# Supplementary material for: The Role of Provenance for the Projected Growth of Juvenile European Beech under Climate Change
Source: MDPI journal article supplement (doi:10.3390/f14010026), 2022-12-23
Supplement: s1 [file s1]

## Supplementary materials

**Table S1** Initial explanatory variables used for construction of neural network model

| Value at original site (1961-1990) |                                     | Ecodistance (origin - new site) |                                     |
|------------------------------------|-------------------------------------|---------------------------------|-------------------------------------|
| bio1                               | Annual mean temperature             | bio1ED                          | Annual mean temperature             |
| bio2                               | Mean diurnal range of temperature   | bio2ED                          | Mean diurnal range of temperature   |
| bio3                               | Isothermality                       | bio3ED                          | Isothermality                       |
| bio4                               | Temperature Seasonality             | bio4ED                          | Temperature Seasonality             |
| bio5                               | Max temperature of warmest month    | bio5ED                          | Max Temperature of warmest month    |
| bio6                               | Min temperature of coldest month    | bio6ED                          | Min temperature of coldest month    |
| bio7                               | Temperature annual range            | bio7ED                          | Temperature annual range            |
| bio8                               | Mean temperature of wettest quarter | bio8ED                          | Mean temeprature of wettest quarter |
| bio9                               | Mean temperature of driest quarter  | bio9ED                          | Mean temperature of driest quarter  |
| bio10                              | Mean temperature of warmest quarter | bio10ED                         | Mean temperature of warmest quarter |
| bio11                              | Mean temperature of coldest quarter | bio11ED                         | Mean temperature of coldest quarter |
| bio12                              | Annual precipitation                | bio12ED                         | Annual precipitation                |
| bio13                              | Precipitation of wettest month      | bio13ED                         | Precipitation of wettest month      |
| bio14                              | Precipitation of diest month        | bio14ED                         | Precipitation of diest month        |
| bio15                              | Precipitation seasonality           | bio15ED                         | Precipitation seasonality           |
| bio16                              | Precipiation of wettest quarter     | bio16ED                         | Precipiation of wettest quarter     |
| bio17                              | precipitation of driest quarter     | bio17ED                         | precipitation of driest quarter     |
| bio18                              | Precipitation of warmest quarter    | bio18ED                         | Precipitation of warmest quarter    |
| bio19                              | Precipitation of coldest quarter    | bio19ED                         | Precipitation of coldest quarter    |
|                                    |                                     | TED                             | Mean temperature                    |
|                                    |                                     | T59ED                           | Mean temperature (May-September)    |
|                                    |                                     | PrecED                          | Precipitation sum                   |
|                                    |                                     | Prec59ED                        | Precipitation sum (May-September)   |
|                                    |                                     | EQED                            | Ellenberg quotient                  |
|                                    |                                     | FAIED                           | Forest Aridity Index                |
|                                    |                                     | xED                             | Latitude                            |
|                                    |                                     | yED                             | Longitude                           |
|                                    |                                     | AltED                           | Altitude                            |

**Table S2** Full country name of provenance abbreviations used in table 3

|       |                   |
|-------|-------------------|
| FR02  | France 02         |
| ESP05 | Spain 05          |
| GER47 | Germany 4         |
| IT78  | Italy 8           |
| IT80  | Italy 80          |
| PL38  | Poland 38         |
| CZ48  | Czech Republic 48 |
| GER85 | Germany 85        |
| PL117 | Poland 117        |
| RO155 | Romania 155       |
| ESP02 | Spain 02          |
| FR23  | France 23         |
| IT37  | Italy 37          |
| IT108 | Italy 108         |
| CR139 | Croatia 139       |
| AU35  | Austria 35        |
| AU36  | Austria 36        |
| CZ51  | Czech Republic 51 |
| AU39  | Austria 39        |
| UA141 | Ukraine 141       |

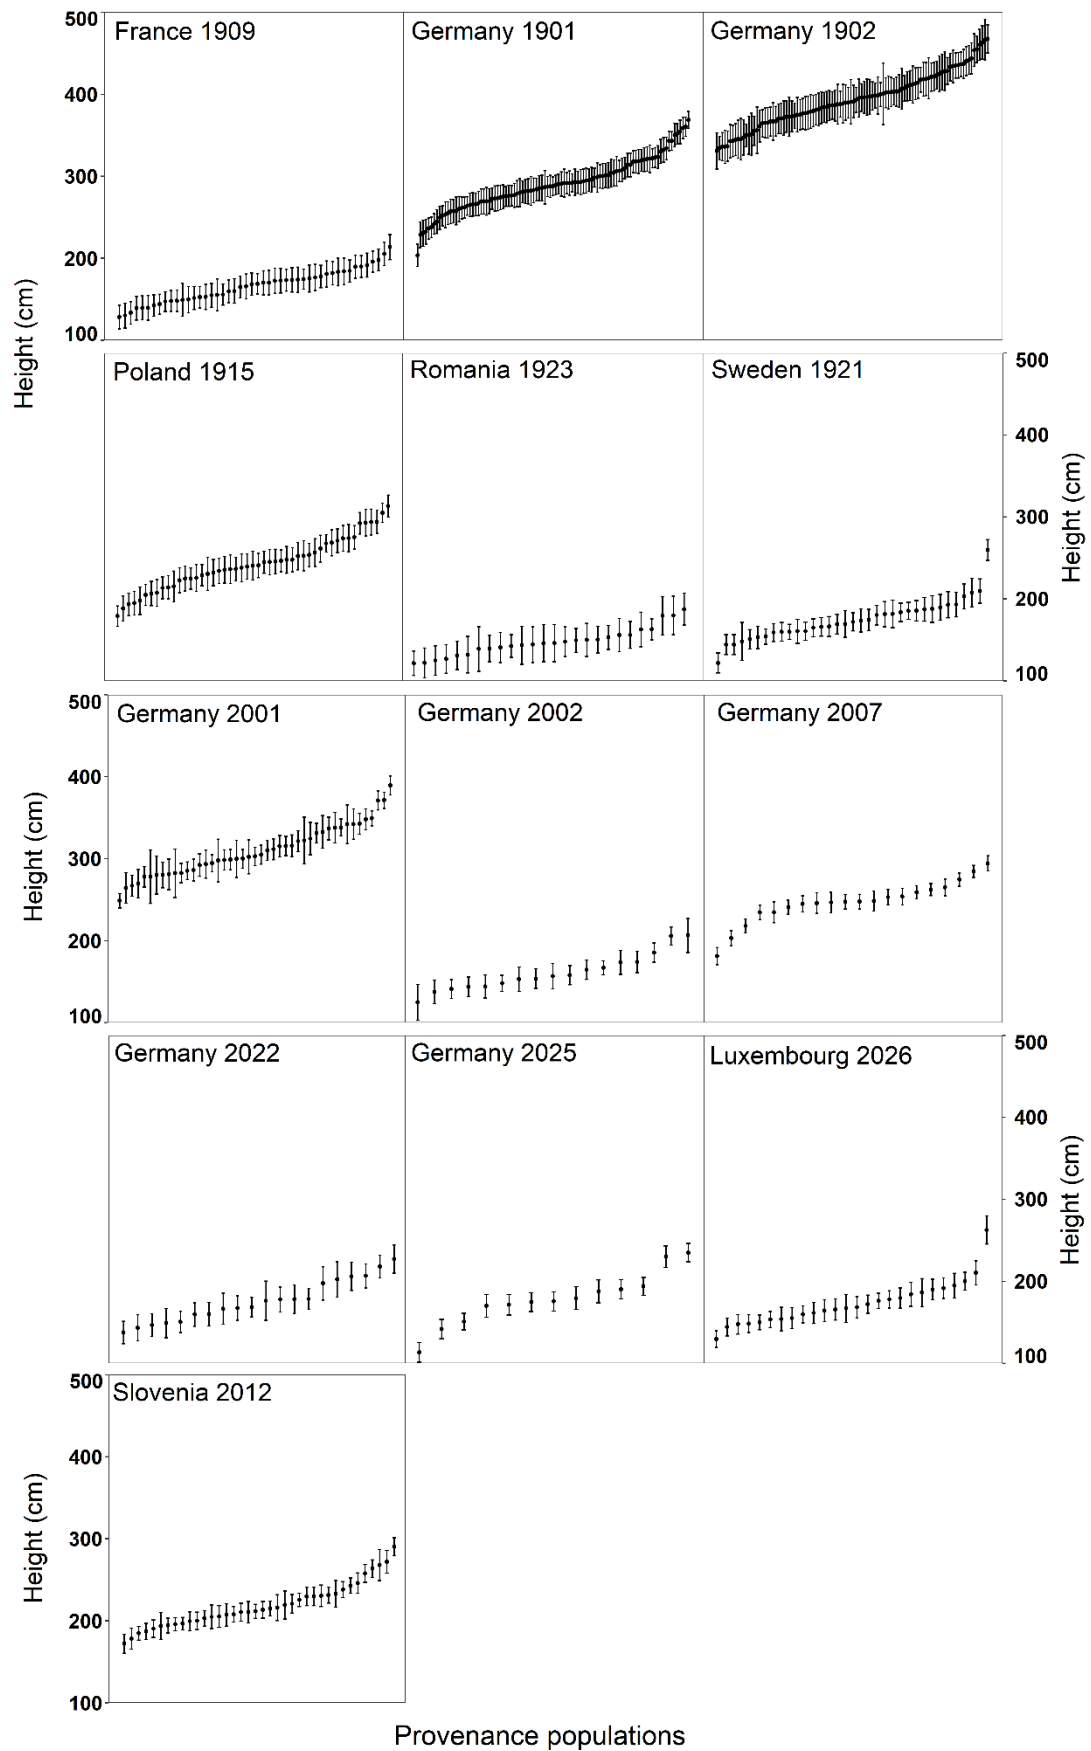

**Figure S1** Variability of height among provenance populations at the 13 common garden sites used for NN development

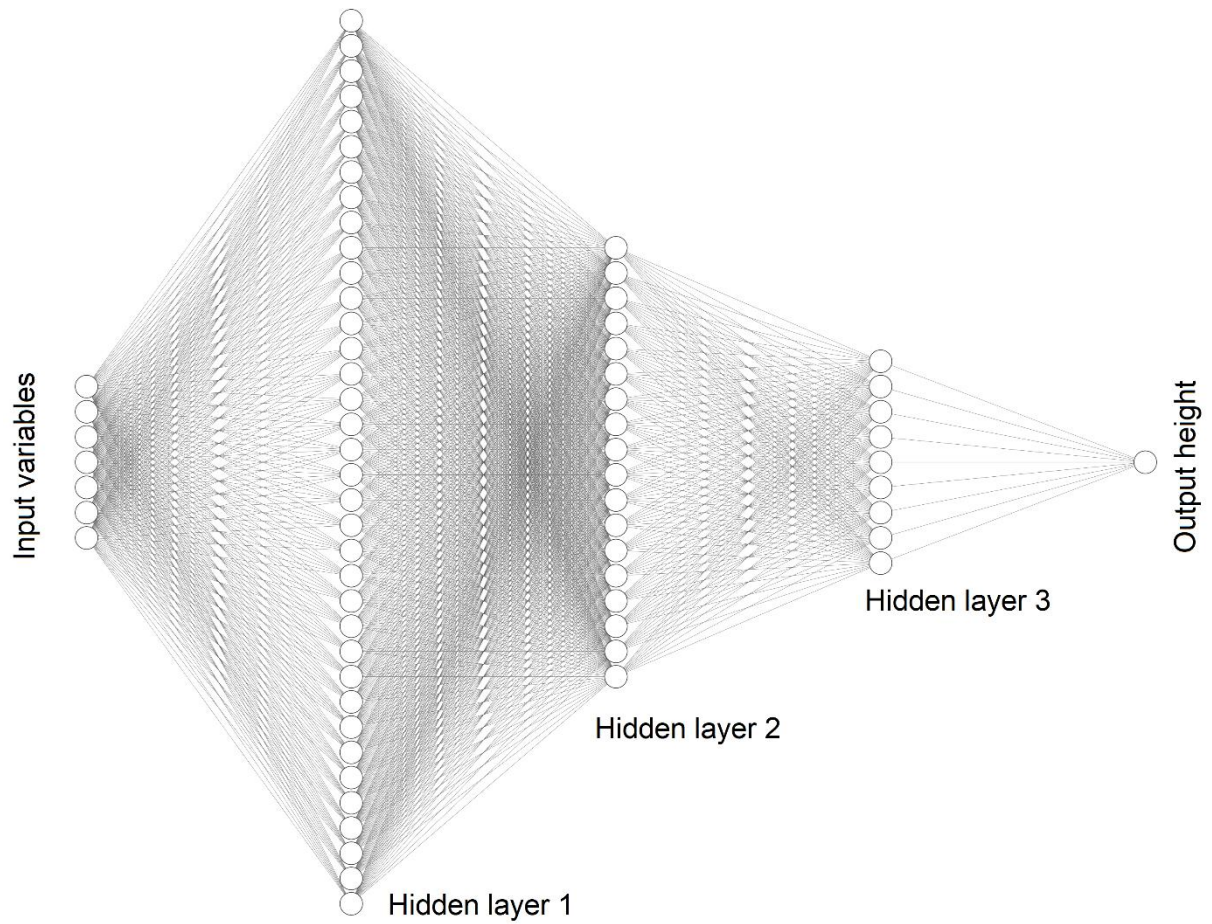

**Figure S2** Final architecture of the neural network model. Input layer has seven neurons (climate variables and ecodistances), which are connected to three hidden layers (36, 18 and 9 neurons) and lead to output height. Each line represents linear or non-linear function between the two connected neurons.
