# Supplementary material for: The Role of Provenance for the Projected Growth of Juvenile European Beech under Climate Change
Source: MDPI journal article supplement (doi:10.3390/f14010026), 2022-12-23
Supplement: s1 [file s1]

| Plot | Provenance | Tree Height | TED        | T59ED | PrecED | Prec59ED | EQED       | FAIED      |
|------|------------|-------------|------------|-------|--------|----------|------------|------------|
| 1901 | 2          | 244.6957    | -17.666663 | -9.8  | -232   | -19      | 4.18307476 | -0.6292553 |
| 1901 | 5          | 273.2653    | -22.666663 | -20.4 | 102    | 86       | -7.6809499 | -3.5205517 |
| 1901 | 7          | 274.0816    | -41.666663 | -38.2 | -62    | 18       | -3.5445855 | -2.3535222 |
| 1901 | 8          | 293.8843    | -22.666663 | -12   | 85     | 79       | -4.1308223 | -2.3296452 |
| 1901 | 9          | 291.5574    | -26.249997 | -13   | -28    | 47       | -0.4967866 | -1.7109963 |
| 1901 | 10         | 241.9835    | -22.166663 | -17.8 | 73     | 52       | -5.0134623 | -1.7037872 |
| 1901 | 11         | 272.6446    | 0.33333667 | 6     | -114   | -83      | 3.68452607 | 0.80892683 |
| 1901 | 12         | 292.5472    | -11.499997 | -7.6  | -51    | -59      | 0.42114481 | 0.2445567  |
| 1901 | 13         | 322.803     | -13.999997 | -14.6 | -129   | -55      | 1.45927741 | -0.0947447 |
| 1901 | 14         | 237.7193    | -22.666663 | -19.8 | -91    | -20      | -0.3412898 | -0.9631239 |
| 1901 | 18         | 275.3636    | -13.333333 | -12.6 | 13     | -7       | -1.7843488 | -0.3306474 |
| 1901 | 20         | 290.2439    | -4.4999967 | -7.2  | -420   | -155     | 7.37167519 | 1.09475    |
| 1901 | 23         | 281.0377    | -17.916663 | -21.2 | -241   | -88      | 3.11949295 | 0.23459189 |
| 1901 | 24         | 282.8333    | -2.333333  | -1    | 151    | 67       | -5.7340889 | -1.3411533 |
| 1901 | 25         | 265.045     | 1.41667    | 3.6   | -56    | -10      | 2.45499895 | 0.08976812 |
| 1901 | 26         | 257.1171    | 2.25000333 | 4     | 117    | 56       | -3.2276607 | -0.9003158 |
| 1901 | 27         | 266.7568    | 4.16667    | 0.4   | 22     | 16       | -1.1050374 | -0.4048642 |
| 1901 | 28         | 228.5185    | 3.00000333 | 0     | 150    | 71       | -6.3701385 | -1.4545861 |
| 1901 | 29         | 257.766     | 1.41667    | 0     | 39     | 17       | -1.2426702 | -0.2093293 |
| 1901 | 30         | 353.9706    | -4.583333  | -9    | 72     | 21       | -4.2183035 | -0.6005861 |
| 1901 | 32         | 343.037     | -0.4166633 | -4.8  | 166    | 40       | -7.8758541 | -0.9149836 |
| 1901 | 36         | 232.5       | -6.833333  | -6.8  | -5     | -20      | -0.3906976 | 0.11248649 |
| 1901 | 37         | 283.7607    | -3.4999967 | -4    | -14    | -22      | 0.01398615 | 0.23770213 |
| 1901 | 38         | 292.6446    | -3.9999967 | -5.4  | -8     | -18      | -0.4341663 | 0.10154348 |
| 1901 | 39         | 343.0147    | -2.833333  | -3.6  | -18    | -27      | 0.2645194  | 0.35516667 |
| 1901 | 40         | 276.3559    | 14.0000033 | -4.2  | 37     | -66      | -2.4649638 | 0.79645455 |
| 1901 | 43         | 263.8095    | -3.083333  | -8.4  | 82     | 15       | -4.4693781 | -0.4328235 |
| 1901 | 44         | 307.75      | 12.41667   | 9     | -92    | -43      | 3.55534642 | 0.82947395 |
| 1901 | 46         | 249.4444    | -4.9166633 | -12.8 | 167    | 47       | -9.1611582 | -1.1280984 |
| 1901 | 48         | 351.7626    | 6.75000333 | 10.2  | -390   | -132     | 8.93242556 | 1.63610101 |
| 1901 | 49         | 299.9074    | 4.58333667 | 7.2   | -244   | -90      | 6.54867797 | 1.25571175 |
| 1901 | 51         | 276.6667    | -14.583333 | -13.8 | -34    | -19      | -0.7099961 | -0.064027  |
| 1901 | 52         | 280         | -14.583333 | -13.8 | -34    | -19      | -0.7099961 | -0.064027  |
| 1901 | 53         | 303.9837    | -12.416663 | -9.2  | -55    | -19      | 0.53130038 | 0.0460542  |
| 1901 | 54         | 323.2558    | 14.7500033 | 15.8  | -400   | -115     | 9.48964533 | 1.49281223 |
| 1901 | 55         | 358.8321    | 2.50000333 | 2     | -201   | -64      | 5.18969051 | 0.77234146 |
| 1901 | 58         | 301.12      | 0.33333667 | 1.6   | -203   | -71      | 5.22591051 | 0.89377251 |
| 1901 | 59         | 230.5556    | 0.33333667 | 1.6   | -203   | -71      | 5.22591051 | 0.89377251 |
| 1901 | 61         | 295.873     | -6.9999967 | -7.6  | -60    | -31      | 0.91900836 | 0.25263185 |
| 1901 | 66         | 282.1818    | -2.7499967 | -4.4  | -86    | -21      | 1.8358225  | 0.10545205 |
| 1901 | 67         | 321.7742    | -12.499997 | -15   | 70     | 28       | -4.5900473 | -0.8928679 |
| 1901 | 68         | 294.72      | 4.91667    | 2.8   | -156   | -61      | 4.33175215 | 0.77514425 |
| 1901 | 69         | 265.5372    | -14.749997 | -19.6 | 84     | 23       | -6.2409487 | -0.9586154 |
| 1901 | 70         | 306.3559    | -14.749997 | -19.6 | 84     | 23       | -6.2409487 | -0.9586154 |
| 1901 | 71         | 318.1301    | -1.833333  | -6.6  | 21     | -3       | -1.6326538 | -0.0915141 |
| 1901 | 72         | 300         | -1.833333  | -6.6  | 21     | -3       | -1.6326538 | -0.0915141 |
| 1901 | 73         | 269.3805    | -1.833333  | -6.6  | 21     | -3       | -1.6326538 | -0.0915141 |
| 1901 | 74         | 321.3043    | 0.33333667 | -4.8  | -8     | -12      | -0.5687558 | 0.05299725 |
| 1901 | 75         | 368.7023    | 3.25000333 | 0.8   | -54    | -36      | 1.77129332 | 0.54436735 |

|      |     |          |            |       |      |      |            |            |
|------|-----|----------|------------|-------|------|------|------------|------------|
| 1901 | 76  | 295.1304 | 10.3333367 | 6.6   | -54  | -21  | 2.40500688 | 0.49266667 |
| 1901 | 77  | 350.2239 | -6.08333   | -14   | 88   | 28   | -5.4892815 | -0.8383963 |
| 1901 | 80  | 287.8788 | 8.66667    | 5.2   | -27  | -22  | 1.44196186 | 0.49442105 |
| 1901 | 83  | 276.1404 | 14.2500033 | 6.6   | 48   | -23  | -0.8216744 | 0.60538144 |
| 1901 | 84  | 261.7273 | 6.58333667 | -1.4  | 70   | -13  | -2.785536  | 0.33280628 |
| 1901 | 87  | 310      | 5.33333667 | 5.6   | -144 | -44  | 4.31566408 | 0.71460759 |
| 1901 | 88  | 265.7143 | -19.999997 | -19   | -12  | -22  | -2.1872532 | -0.1734652 |
| 1901 | 89  | 298.5    | 3.33333667 | 3.8   | -116 | -36  | 3.49296871 | 0.56106494 |
| 1901 | 90  | 285.3782 | -6.08333   | -9    | 71   | 23   | -3.7267445 | -0.6224472 |
| 1901 | 91  | 333.8731 | -4.6666633 | -7.2  | -3   | -9   | -0.9938617 | -0.1325227 |
| 1901 | 92  | 330.2362 | -4.6666633 | -7.2  | -3   | -9   | -0.9938617 | -0.1325227 |
| 1901 | 93  | 286.5094 | -8.4999967 | -10   | 15   | 7    | -1.7120189 | -0.3301404 |
| 1901 | 94  | 287.5781 | -7.4999967 | -11.4 | -223 | -131 | 3.70087835 | 1.05018033 |
| 1901 | 95  | 275.0893 | 5.58333667 | 0.8   | -175 | -145 | 4.15489198 | 1.47785185 |
| 1901 | 97  | 292.069  | -6.33333   | -10.8 | -51  | -75  | -0.2149875 | 0.61207889 |
| 1901 | 98  | 360.315  | -2.08333   | -9.2  | -18  | -76  | -0.9306997 | 0.72827273 |
| 1901 | 99  | 281.7143 | 8.91667    | 4.4   | -198 | -156 | 5.02788822 | 1.61647619 |
| 1901 | 100 | 253.099  | -1.08333   | -8.4  | 59   | 8    | -3.562775  | -0.2875447 |
| 1901 | 101 | 257.2816 | 7.58333667 | 2.6   | -249 | -208 | 5.61182935 | 1.89015094 |
| 1901 | 102 | 269.7297 | 11.0000033 | 1.6   | 49   | -24  | -1.5840629 | 0.51517526 |
| 1901 | 103 | 320.8772 | 14.2500033 | 5     | 44   | -28  | -0.977978  | 0.63365306 |
| 1901 | 104 | 261.4063 | 11.8333367 | 1.2   | -163 | -113 | 3.91406376 | 1.28575104 |
| 1901 | 108 | 285.6364 | -28.499997 | -41   | -345 | -183 | 2.82501815 | 0.72656926 |
| 1901 | 109 | 332.1239 | 42.0000033 | 33.2  | -332 | -258 | 9.80573598 | 2.60107788 |
| 1901 | 110 | 251.8605 | 22.66667   | 15.2  | -4   | -46  | 1.87917041 | 1.04063415 |
| 1901 | 111 | 260      | 21.2500033 | 11.6  | -232 | -176 | 6.3547397  | 1.90527928 |
| 1901 | 114 | 255.0505 | 34.91667   | 23.8  | -200 | -201 | 6.88275235 | 2.26113514 |
| 1901 | 115 | 281.5596 | 14.5000033 | -3    | -9   | -91  | -0.9414096 | 1.06667797 |
| 1901 | 116 | 313.7398 | -4.58333   | -22.8 | 49   | -82  | -5.6656956 | 0.58712311 |
| 1901 | 117 | 269.1935 | 31.5000033 | 25.8  | -22  | -115 | 4.3433165  | 1.87089796 |
| 1901 | 118 | 319.375  | 0.25000333 | -9    | 157  | -21  | -7.4079051 | 0.31127919 |
| 1901 | 120 | 278.7379 | 4.00000333 | -16.2 | 164  | 6    | -10.047298 | -0.3327912 |
| 1901 | 124 | 272.9752 | 0.41667    | -17.6 | 42   | -54  | -4.5186567 | 0.40506977 |
| 1901 | 126 | 291.5385 | -0.1666633 | -14.4 | -26  | -80  | -1.213406  | 0.60549886 |
| 1901 | 127 | 320.2609 | -1.08333   | -18.8 | 6    | -55  | -3.2003591 | 0.32339953 |
| 1901 | 129 | 287.4016 | -2.2499967 | -15.6 | 0    | -71  | -2.3129259 | 0.59885068 |
| 1901 | 130 | 303.9    | -9.4999967 | -23.4 | 63   | -45  | -5.650511  | 0.08054545 |
| 1901 | 132 | 301.2069 | 24.41667   | 13    | -77  | -136 | 3.58081089 | 1.646      |
| 1901 | 135 | 317.7311 | 12.8333367 | -4.6  | -10  | -84  | -1.0446065 | 0.96799134 |
| 1901 | 136 | 236.2832 | 9.16667    | 3.2   | -582 | -275 | 9.6483962  | 1.93560265 |
| 1901 | 137 | 298.3846 | -5.2499967 | -12   | -604 | -247 | 8.65931959 | 1.44418182 |
| 1901 | 138 | 203.5135 | -13.58333  | -27   | -300 | -195 | 3.43290865 | 1.13422669 |
| 1901 | 139 | 290.5983 | -63.916663 | -67.6 | -536 | -130 | 3.60881335 | -1.0778835 |
| 1901 | 141 | 306.1468 | 31.0000033 | 20.6  | -208 | -181 | 7.01250097 | 2.0104732  |
| 1901 | 142 | 313.6752 | 31.0000033 | 20.6  | -208 | -181 | 7.01250097 | 2.0104732  |
| 1901 | 144 | 317.931  | 13.41667   | -2    | -47  | -105 | 1.07712575 | 1.27559016 |
| 1901 | 145 | 269.3269 | -17.83333  | -34.6 | 88   | -7   | -8.7350311 | -0.7838361 |
| 1901 | 146 | 289.2537 | -24.33333  | -42.4 | 127  | 16   | -12.033656 | -1.3827719 |
| 1901 | 150 | 292.7835 | 0.50000333 | -17   | 119  | -39  | -7.0439092 | 0.3658568  |
| 1901 | 158 | 291.6807 | -2.6666633 | -18.2 | 65   | 5    | -5.2858166 | -0.5284944 |

|      |    |          |            |       |      |      |            |            |
|------|----|----------|------------|-------|------|------|------------|------------|
| 1902 | 2  | 355.3333 | 0.66666667 | 5.6   | -189 | -1   | 4.62831476 | -0.4862333 |
| 1902 | 5  | 345.1667 | -4.3333333 | -5    | 145  | 104  | -7.2357099 | -3.3775297 |
| 1902 | 7  | 389.8333 | -23.333333 | -22.8 | -19  | 36   | -3.0993455 | -2.2105002 |
| 1902 | 8  | 410.5    | -4.3333333 | 3.4   | 128  | 97   | -3.6855823 | -2.1866232 |
| 1902 | 9  | 435.1667 | -7.9166667 | 2.4   | 15   | 65   | -0.0515466 | -1.5679743 |
| 1902 | 10 | 393      | -3.8333333 | -2.4  | 116  | 70   | -4.5682223 | -1.5607652 |
| 1902 | 11 | 372.6667 | 18.6666667 | 21.4  | -71  | -65  | 4.12976607 | 0.95194883 |
| 1902 | 13 | 443.6667 | 4.33333333 | 0.8   | -86  | -37  | 1.90451741 | 0.04827732 |
| 1902 | 14 | 367      | -4.3333333 | -4.4  | -48  | -2   | 0.10395019 | -0.8201019 |
| 1902 | 15 | 407.1667 | 6.5        | 1.8   | -99  | -34  | 2.32564478 | 0.08817094 |
| 1902 | 18 | 396.1667 | 5          | 2.8   | 56   | 11   | -1.3391088 | -0.1876254 |
| 1902 | 20 | 391.1667 | 13.8333333 | 8.2   | -377 | -137 | 7.81691519 | 1.237772   |
| 1902 | 21 | 440.3333 | 6.08333333 | 4.4   | -208 | -37  | 5.17789093 | 0.41787696 |
| 1902 | 23 | 375      | 0.41666667 | -5.8  | -198 | -70  | 3.56473295 | 0.37761389 |
| 1902 | 24 | 365      | 16         | 14.4  | 194  | 85   | -5.2888489 | -1.1981313 |
| 1902 | 25 | 379.5    | 19.75      | 19    | -13  | 8    | 2.90023895 | 0.23279012 |
| 1902 | 26 | 342.6667 | 20.5833333 | 19.4  | 160  | 74   | -2.7824207 | -0.7572938 |
| 1902 | 27 | 336      | 22.5       | 15.8  | 65   | 34   | -0.6597974 | -0.2618422 |
| 1902 | 28 | 345.25   | 21.3333333 | 15.4  | 193  | 89   | -5.9248985 | -1.3115641 |
| 1902 | 29 | 417.6667 | 19.75      | 15.4  | 82   | 35   | -0.7974302 | -0.0663073 |
| 1902 | 32 | 423.1667 | 17.9166667 | 10.6  | 209  | 58   | -7.4306141 | -0.7719616 |
| 1902 | 36 | 402.6667 | 11.5       | 8.6   | 38   | -2   | 0.05454243 | 0.25550849 |
| 1902 | 37 | 402.1667 | 14.8333333 | 11.4  | 29   | -4   | 0.45922615 | 0.38072413 |
| 1902 | 38 | 349.8    | 14.3333333 | 10    | 35   | 0    | 0.01107366 | 0.24456548 |
| 1902 | 39 | 463.1667 | 15.5       | 11.8  | 25   | -9   | 0.7097594  | 0.49818867 |
| 1902 | 40 | 411.6667 | 20.5833333 | 16.6  | 0    | -21  | 1.9280226  | 0.77152827 |
| 1902 | 42 | 453.8333 | 32.3333333 | 11.2  | 80   | -48  | -2.0197238 | 0.93947655 |
| 1902 | 43 | 366.6667 | 21.75      | 15    | 59   | 11   | -0.1873476 | 0.32913129 |
| 1902 | 44 | 343      | 15.25      | 7     | 125  | 33   | -4.0241381 | -0.2898015 |
| 1902 | 46 | 373.6667 | 30.75      | 24.4  | -49  | -25  | 4.00058642 | 0.97249595 |
| 1902 | 47 | 433.1667 | 13.4166667 | 2.6   | 210  | 65   | -8.7159182 | -0.9850764 |
| 1902 | 48 | 428.3333 | 11.8333333 | -1.6  | 222  | 71   | -10.111703 | -1.1944331 |
| 1902 | 50 | 467.5    | 25.0833333 | 25.6  | -347 | -114 | 9.37766556 | 1.77912301 |
| 1902 | 51 | 395.3333 | 23.9166667 | 23.2  | -163 | -56  | 6.36281138 | 1.28626338 |
| 1902 | 52 | 441.8333 | 3.75       | 1.6   | 9    | -1   | -0.2647561 | 0.07899505 |
| 1902 | 53 | 375      | 3.75       | 1.6   | 9    | -1   | -0.2647561 | 0.07899505 |
| 1902 | 54 | 427      | 5.91666667 | 6.2   | -12  | -1   | 0.97654038 | 0.1890762  |
| 1902 | 55 | 466.5    | 33.0833333 | 31.2  | -357 | -97  | 9.93488533 | 1.63583423 |
| 1902 | 57 | 435      | 20.8333333 | 17.4  | -158 | -46  | 5.63493051 | 0.91536346 |
| 1902 | 58 | 454.6667 | 13.4166667 | 3.8   | -569 | -227 | 9.25908105 | 1.57905784 |
| 1902 | 59 | 388.5    | 17.9166667 | 16.2  | -161 | -52  | 5.47621011 | 0.99521248 |
| 1902 | 61 | 424.8333 | 18.6666667 | 17    | -160 | -53  | 5.67115051 | 1.03679451 |
| 1902 | 62 | 460.3333 | 18.6666667 | 17    | -160 | -53  | 5.67115051 | 1.03679451 |
| 1902 | 66 | 383.5    | 11.3333333 | 7.8   | -17  | -13  | 1.36424836 | 0.39565385 |
| 1902 | 67 | 402.8333 | 12.25      | 9.8   | -14  | -16  | 1.53625141 | 0.51452329 |
| 1902 | 68 | 370      | 15.5833333 | 11    | -43  | -3   | 2.2810625  | 0.24847405 |
| 1902 | 69 | 413.8333 | 5.83333333 | 0.4   | 113  | 46   | -4.1448073 | -0.7498459 |
| 1902 | 70 | 396.8333 | 23.25      | 18.2  | -113 | -43  | 4.77699215 | 0.91816625 |
| 1902 | 71 | 397.8333 | 3.58333333 | -4.2  | 127  | 41   | -5.7957087 | -0.8155934 |
| 1902 | 72 | 428      | 3.58333333 | -4.2  | 127  | 41   | -5.7957087 | -0.8155934 |

|      |     |          |            |       |      |      |            |            |
|------|-----|----------|------------|-------|------|------|------------|------------|
| 1902 | 73  | 409.8333 | 16.5       | 8.8   | 64   | 15   | -1.1874138 | 0.05150788 |
| 1902 | 74  | 364.5    | 16.5       | 8.8   | 64   | 15   | -1.1874138 | 0.05150788 |
| 1902 | 75  | 434      | 16.5       | 8.8   | 64   | 15   | -1.1874138 | 0.05150788 |
| 1902 | 76  | 403.8333 | 18.6666667 | 10.6  | 35   | 6    | -0.1235158 | 0.19601925 |
| 1902 | 77  | 376.8333 | 21.5833333 | 16.2  | -11  | -18  | 2.21653332 | 0.68738935 |
| 1902 | 80  | 381.1667 | 28.6666667 | 22    | -11  | -3   | 2.85024688 | 0.63568867 |
| 1902 | 83  | 370.5    | 12.25      | 1.4   | 131  | 46   | -5.0440415 | -0.6953743 |
| 1902 | 84  | 372.6667 | 27         | 20.6  | 16   | -4   | 1.88720186 | 0.63744305 |
| 1902 | 86  | 400.5    | 32.5833333 | 22    | 91   | -5   | -0.3764344 | 0.74840344 |
| 1902 | 87  | 403      | 24.9166667 | 14    | 113  | 5    | -2.340296  | 0.47582828 |
| 1902 | 88  | 419.5    | 23.6666667 | 21    | -101 | -26  | 4.76090408 | 0.85762959 |
| 1902 | 89  | 386.3333 | -1.6666667 | -3.6  | 31   | -4   | -1.7420132 | -0.0304432 |
| 1902 | 90  | 396.5    | 21.6666667 | 19.2  | -73  | -18  | 3.93820871 | 0.70408694 |
| 1902 | 91  | 418.4746 | 12.25      | 6.4   | 114  | 41   | -3.2815045 | -0.4794252 |
| 1902 | 92  | 386.1667 | 13.6666667 | 8.2   | 40   | 9    | -0.5486217 | 0.01049927 |
| 1902 | 93  | 370.8333 | 13.6666667 | 8.2   | 40   | 9    | -0.5486217 | 0.01049927 |
| 1902 | 94  | 421.3333 | 9.83333333 | 5.4   | 58   | 25   | -1.2667789 | -0.1871184 |
| 1902 | 95  | 437      | 10.8333333 | 4     | -180 | -113 | 4.14611835 | 1.19320233 |
| 1902 | 97  | 389.8333 | 23.9166667 | 16.2  | -132 | -127 | 4.60013198 | 1.62087385 |
| 1902 | 99  | 373      | 12         | 4.6   | -8   | -57  | 0.23025249 | 0.75510089 |
| 1902 | 100 | 376.3333 | 27.25      | 19.8  | -155 | -138 | 5.47312822 | 1.75949819 |
| 1902 | 101 | 330.8333 | 17.25      | 7     | 102  | 26   | -3.117535  | -0.1445227 |
| 1902 | 102 | 361      | 25.9166667 | 18    | -206 | -190 | 6.05706935 | 2.03317294 |
| 1902 | 104 | 336.6667 | 29.3333333 | 17    | 92   | -6   | -1.1388229 | 0.65819726 |
| 1902 | 108 | 401.8333 | 30.1666667 | 16.6  | -120 | -95  | 4.35930376 | 1.42877304 |
| 1902 | 109 | 381.5    | -10.166667 | -25.6 | -302 | -165 | 3.27025815 | 0.86959126 |
| 1902 | 110 | 365.1667 | 60.3333333 | 48.6  | -289 | -240 | 10.250976  | 2.74409988 |
| 1902 | 111 | 387.8689 | 41         | 30.6  | 39   | -28  | 2.32441041 | 1.18365615 |
| 1902 | 114 | 344.5    | 39.5833333 | 27    | -189 | -158 | 6.7999797  | 2.04830128 |
| 1902 | 116 | 379      | 53.25      | 39.2  | -157 | -183 | 7.32799235 | 2.40415714 |
| 1902 | 117 | 399.625  | 13.75      | -7.4  | 92   | -64  | -5.2204556 | 0.73014511 |
| 1902 | 118 | 390.6667 | 49.8333333 | 41.2  | 21   | -97  | 4.7885565  | 2.01391996 |
| 1902 | 120 | 351      | 18.5833333 | 6.4   | 200  | -3   | -6.9626651 | 0.45430119 |
| 1902 | 124 | 412.8333 | 22.3333333 | -0.8  | 207  | 24   | -9.6020581 | -0.1897692 |
| 1902 | 125 | 366.6667 | 18.75      | -2.2  | 85   | -36  | -4.0734167 | 0.54809177 |
| 1902 | 126 | 350      | 14.4166667 | -2.4  | 50   | -61  | -2.37789   | 0.70581658 |
| 1902 | 127 | 418.1667 | 18.1666667 | 1     | 17   | -62  | -0.768166  | 0.74852086 |
| 1902 | 129 | 356      | 17.25      | -3.4  | 49   | -37  | -2.7551191 | 0.46642153 |
| 1902 | 130 | 395.8333 | 16.0833333 | -0.2  | 43   | -53  | -1.8676859 | 0.74187268 |
| 1902 | 132 | 386.3333 | 8.83333333 | -8    | 106  | -27  | -5.205271  | 0.22356745 |
| 1902 | 135 | 377.5    | 42.75      | 28.4  | -34  | -118 | 4.02605089 | 1.789022   |
| 1902 | 136 | 334.3333 | 31.1666667 | 10.8  | 33   | -66  | -0.5993665 | 1.11101334 |
| 1902 | 137 | 347.3333 | 27.5       | 18.6  | -539 | -257 | 10.0936362 | 2.07862465 |
| 1902 | 138 | 336      | 13.0833333 | 3.4   | -561 | -229 | 9.10455959 | 1.58720382 |
| 1902 | 141 | 421      | 4.75       | -11.6 | -257 | -177 | 3.87814865 | 1.27724869 |
| 1902 | 144 | 384      | 49.3333333 | 36    | -165 | -163 | 7.45774097 | 2.1534952  |
| 1902 | 146 | 387.75   | 31.75      | 13.4  | -4   | -87  | 1.52236575 | 1.41861216 |
| 1902 | 148 | 406.5    | -6         | -27   | 170  | 34   | -11.588416 | -1.2397499 |
| 1902 | 150 | 398.3333 | 30.25      | 17.2  | -39  | -107 | 2.91586765 | 1.57457756 |
| 1902 | 155 | 436.5    | 18.8333333 | -1.6  | 162  | -21  | -6.5986692 | 0.5088788  |

|      |     |          |            |       |      |      |            |            |
|------|-----|----------|------------|-------|------|------|------------|------------|
| 1902 | 158 | 398.5    | 24         | -0.4  | 195  | -7   | -8.5957288 | 0.294022   |
| 1902 | 161 | 384.3333 | 15.6666667 | -2.8  | 108  | 23   | -4.8405766 | -0.3854724 |
| 1909 | 2   | 133.4851 | -0.5833333 | -1    | -262 | -72  | 5.97783476 | 0.84582774 |
| 1909 | 5   | 173.5424 | -5.5833333 | -11.6 | 72   | 33   | -5.8861899 | -2.0454687 |
| 1909 | 9   | 183.3725 | -9.1666667 | -4.2  | -58  | -6   | 1.29797338 | -0.2359133 |
| 1909 | 12  | 149.25   | 5.5833333  | 1.2   | -81  | -112 | 2.21590481 | 1.7196397  |
| 1909 | 15  | 195.7923 | 5.25       | -4.8  | -172 | -105 | 3.67516478 | 1.42023194 |
| 1909 | 19  | 159.7018 | 16.25      | 6.6   | -303 | -140 | 7.10655063 | 1.84981396 |
| 1909 | 24  | 139.1124 | 14.75      | 7.8   | 121  | 14   | -3.9393289 | 0.13392972 |
| 1909 | 25  | 142.3929 | 18.5       | 12.4  | -86  | -63  | 4.24975895 | 1.56485112 |
| 1909 | 26  | 152.9    | 19.3333333 | 12.8  | 87   | 3    | -1.4329007 | 0.57476721 |
| 1909 | 36  | 173.3145 | 10.25      | 2     | -35  | -73  | 1.40406243 | 1.58756949 |
| 1909 | 37  | 173.8818 | 13.5833333 | 4.8   | -44  | -75  | 1.80874615 | 1.71278513 |
| 1909 | 40  | 165.6696 | 31.0833333 | 4.6   | 7    | -119 | -0.6702038 | 2.27153755 |
| 1909 | 43  | 168.4463 | 14         | 0.4   | 52   | -38  | -2.6746181 | 1.04225947 |
| 1909 | 44  | 128.2474 | 29.5       | 17.8  | -122 | -96  | 5.35010642 | 2.30455695 |
| 1909 | 46  | 176.6509 | 12.1666667 | -4    | 137  | -6   | -7.3663982 | 0.34698464 |
| 1909 | 66  | 155.7458 | 14.3333333 | 4.4   | -116 | -74  | 3.6305825  | 1.58053505 |
| 1909 | 67  | 168.8788 | 4.5833333  | -6.2  | 40   | -25  | -2.7952873 | 0.58221508 |
| 1909 | 69  | 164.9    | 2.3333333  | -10.8 | 54   | -30  | -4.4461887 | 0.51646762 |
| 1909 | 70  | 184.036  | 2.3333333  | -10.8 | 54   | -30  | -4.4461887 | 0.51646762 |
| 1909 | 72  | 148.1442 | 15.25      | 2.2   | -9   | -56  | 0.16210619 | 1.38356888 |
| 1909 | 74  | 175.2213 | 17.4166667 | 4     | -38  | -65  | 1.22600416 | 1.52808025 |
| 1909 | 76  | 191.5547 | 27.4166667 | 15.4  | -84  | -74  | 4.19976688 | 1.96774967 |
| 1909 | 77  | 151.5351 | 11         | -5.2  | 58   | -25  | -3.6945215 | 0.63668672 |
| 1909 | 80  | 177.7826 | 25.75      | 14    | -57  | -75  | 3.23672186 | 1.96950405 |
| 1909 | 83  | 139.5377 | 31.3333333 | 15.4  | 18   | -76  | 0.9730856  | 2.08046444 |
| 1909 | 84  | 147.1964 | 23.6666667 | 7.4   | 40   | -66  | -0.990776  | 1.80788928 |
| 1909 | 87  | 160.0328 | 22.4166667 | 14.4  | -174 | -97  | 6.11042408 | 2.18969059 |
| 1909 | 88  | 154.7453 | -2.9166667 | -10.2 | -42  | -75  | -0.3924932 | 1.30161776 |
| 1909 | 89  | 155.3544 | 20.4166667 | 12.6  | -146 | -89  | 5.28772871 | 2.03614794 |
| 1909 | 90  | 170.2182 | 11         | -0.2  | 41   | -30  | -1.9319845 | 0.8526358  |
| 1909 | 92  | 184.4915 | 12.4166667 | 1.6   | -33  | -62  | 0.80089829 | 1.34256027 |
| 1909 | 93  | 172.5248 | 8.5833333  | -1.2  | -15  | -46  | 0.08274111 | 1.14494265 |
| 1909 | 94  | 205.35   | 9.5833333  | -2.6  | -253 | -184 | 5.49563835 | 2.52526333 |
| 1909 | 97  | 198.0081 | 10.75      | -2    | -81  | -128 | 1.57977249 | 2.08716189 |
| 1909 | 99  | 180.7128 | 26         | 13.2  | -228 | -209 | 6.82264822 | 3.09155919 |
| 1909 | 100 | 148.0588 | 16         | 0.4   | 29   | -45  | -1.768015  | 1.18753833 |
| 1909 | 101 | 170.0734 | 24.6666667 | 11.4  | -279 | -261 | 7.40658935 | 3.36523394 |
| 1909 | 102 | 130.1375 | 28.0833333 | 10.4  | 19   | -77  | 0.21069706 | 1.99025826 |
| 1909 | 104 | 152.569  | 28.9166667 | 10    | -193 | -166 | 5.70882376 | 2.76083404 |
| 1909 | 108 | 172.6981 | -11.416667 | -32.2 | -375 | -236 | 4.61977815 | 2.20165226 |
| 1909 | 110 | 143.9554 | 39.75      | 24    | -34  | -99  | 3.67393041 | 2.51571715 |
| 1909 | 111 | 139.5673 | 38.3333333 | 20.4  | -262 | -229 | 8.1494997  | 3.38036228 |
| 1909 | 115 | 181.7951 | 31.5833333 | 5.8   | -39  | -144 | 0.85335043 | 2.54176097 |
| 1909 | 124 | 189.8943 | 17.5       | -8.8  | 12   | -107 | -2.7238967 | 1.88015277 |
| 1909 | 129 | 174.4403 | 14.8333333 | -6.8  | -30  | -124 | -0.5181659 | 2.07393368 |
| 1909 | 130 | 213.5328 | 7.5833333  | -14.6 | 33   | -98  | -3.855751  | 1.55562845 |
| 1909 | 132 | 149.6814 | 41.5       | 21.8  | -107 | -189 | 5.37557089 | 3.121083   |
| 1909 | 146 | 189.5323 | -7.25      | -33.6 | 97   | -37  | -10.238896 | 0.09231107 |

|      |     |          |            |       |      |      |            |            |
|------|-----|----------|------------|-------|------|------|------------|------------|
| 1915 | 2   | 234.4    | -21.916663 | 2.8   | -358 | 10   | 11.0702448 | -0.8822553 |
| 1915 | 9   | 247.8083 | -30.499997 | -0.4  | -154 | 76   | 6.39038338 | -1.9639963 |
| 1915 | 10  | 225.9182 | -26.416663 | -5.2  | -53  | 81   | 1.87370767 | -1.9567872 |
| 1915 | 12  | 271.1203 | -15.749997 | 5     | -177 | -30  | 7.30831481 | -0.0084433 |
| 1915 | 15  | 246.6087 | -16.08333  | -1    | -268 | -23  | 8.76757478 | -0.3078511 |
| 1915 | 24  | 235.6842 | -6.58333   | 11.6  | 25   | 96   | 1.1530811  | -1.5941533 |
| 1915 | 25  | 225.068  | -2.83333   | 16.2  | -182 | 19   | 9.34216895 | -0.1632319 |
| 1915 | 26  | 213.5798 | -1.9999967 | 16.6  | -9   | 85   | 3.65950926 | -1.1533158 |
| 1915 | 35  | 305.1857 | -12.08333  | 5.6   | -144 | 7    | 6.75328303 | -0.1162473 |
| 1915 | 36  | 225.0847 | -11.08333  | 5.8   | -131 | 9    | 6.49647243 | -0.1405135 |
| 1915 | 37  | 252.8132 | -7.7499967 | 8.6   | -140 | 7    | 6.90115615 | -0.0152979 |
| 1915 | 38  | 240.7876 | -8.2499967 | 7.2   | -134 | 11   | 6.45300366 | -0.1514565 |
| 1915 | 40  | 245.7297 | -1.9999967 | 13.8  | -169 | -10  | 8.3699526  | 0.37550627 |
| 1915 | 43  | 274.256  | 9.75000333 | 8.4   | -89  | -37  | 4.42220619 | 0.54345455 |
| 1915 | 44  | 193.6261 | -7.33333   | 4.2   | -44  | 44   | 2.41779191 | -0.6858235 |
| 1915 | 66  | 241.0565 | 8.16667    | 21.6  | -218 | -14  | 10.4425164 | 0.57647395 |
| 1915 | 67  | 238.11   | -6.9999967 | 8.2   | -212 | 8    | 8.7229925  | -0.1475479 |
| 1915 | 69  | 275.3594 | -16.749997 | -2.4  | -56  | 57   | 2.29712271 | -1.1458679 |
| 1915 | 70  | 294.0268 | -18.999997 | -7    | -42  | 52   | 0.64622126 | -1.2116154 |
| 1915 | 72  | 215.4545 | -18.999997 | -7    | -42  | 52   | 0.64622126 | -1.2116154 |
| 1915 | 74  | 293.2239 | -6.08333   | 6     | -105 | 26   | 5.25451619 | -0.3445141 |
| 1915 | 76  | 313.4662 | -3.9166633 | 7.8   | -134 | 17   | 6.31841416 | -0.2000028 |
| 1915 | 77  | 214.2653 | 6.08333667 | 19.2  | -180 | 8    | 9.29217688 | 0.23966667 |
| 1915 | 80  | 222.9048 | -10.33333  | -1.4  | -38  | 57   | 1.39788853 | -1.0913963 |
| 1915 | 83  | 230.7326 | 4.41667    | 17.8  | -153 | 7    | 8.32913186 | 0.24142105 |
| 1915 | 84  | 236.8291 | 10.0000033 | 19.2  | -78  | 6    | 6.0654956  | 0.35238144 |
| 1915 | 87  | 197.951  | 2.33333667 | 11.2  | -56  | 16   | 4.10163398 | 0.07980628 |
| 1915 | 88  | 274.0244 | 1.08333667 | 18.2  | -270 | -15  | 11.2028341 | 0.46160759 |
| 1915 | 89  | 261.5726 | -24.249997 | -6.4  | -138 | 7    | 4.69991684 | -0.4264652 |
| 1915 | 90  | 267.9134 | -0.9166633 | 16.4  | -242 | -7   | 10.3801387 | 0.30806494 |
| 1915 | 92  | 207.5789 | -10.33333  | 3.6   | -55  | 52   | 3.16042554 | -0.8754472 |
| 1915 | 93  | 256.7522 | -8.9166633 | 5.4   | -129 | 20   | 5.89330829 | -0.3855227 |
| 1915 | 94  | 195.1782 | -12.749997 | 2.6   | -111 | 36   | 5.17515111 | -0.5831404 |
| 1915 | 97  | 268.7018 | -11.749997 | 1.2   | -349 | -102 | 10.5880484 | 0.79718033 |
| 1915 | 99  | 239.5691 | -10.58333  | 1.8   | -177 | -46  | 6.67218249 | 0.35907889 |
| 1915 | 101 | 236.3282 | 4.66667    | 17    | -324 | -127 | 11.9150582 | 1.36347619 |
| 1915 | 102 | 207      | 3.33333667 | 15.2  | -375 | -179 | 12.4989993 | 1.63715094 |
| 1915 | 104 | 179.3905 | 6.75000333 | 14.2  | -77  | 5    | 5.30310706 | 0.26217526 |
| 1915 | 108 | 205.2295 | 7.58333667 | 13.8  | -289 | -84  | 10.8012338 | 1.03275104 |
| 1915 | 110 | 229.4035 | -32.749997 | -28.4 | -471 | -154 | 9.71218815 | 0.47356926 |
| 1915 | 111 | 292.442  | 18.41667   | 27.8  | -130 | -17  | 8.76634041 | 0.78763415 |
| 1915 | 114 | 188.5328 | 17.0000033 | 24.2  | -358 | -147 | 13.2419097 | 1.65227928 |
| 1915 | 124 | 252.3545 | 30.66667   | 36.4  | -326 | -172 | 13.7699224 | 2.00813514 |
| 1915 | 125 | 253.8448 | -3.83333   | -5    | -84  | -25  | 2.3685133  | 0.15206977 |
| 1915 | 129 | 294.2246 | -8.1666633 | -5.2  | -119 | -50  | 4.06404    | 0.30979458 |
| 1915 | 130 | 244.932  | -6.4999967 | -3    | -126 | -42  | 4.57424408 | 0.34585068 |
| 1915 | 132 | 247.9292 | -13.749997 | -10.8 | -63  | -16  | 1.23665905 | -0.1724545 |
| 1915 | 135 | 232.1897 | 20.16667   | 25.6  | -203 | -107 | 10.4679809 | 1.393      |
| 1915 | 161 | 245.1638 | 8.58333667 | 8     | -136 | -55  | 5.84256349 | 0.71499134 |
| 1921 | 11  | 203.2564 | -29.666663 | -13   | -191 | -98  | 4.30400607 | 0.68757083 |

|      |     |          |            |       |      |      |            |            |
|------|-----|----------|------------|-------|------|------|------------|------------|
| 1921 | 14  | 154.3462 | -52.666663 | -38.8 | -168 | -35  | 0.27819019 | -1.0844799 |
| 1921 | 18  | 189.9307 | -43.33333  | -31.6 | -64  | -22  | -1.1648688 | -0.4520034 |
| 1921 | 26  | 172.1429 | -27.749997 | -15   | 40   | 41   | -2.6081807 | -1.0216718 |
| 1921 | 28  | 144.5062 | -26.999997 | -19   | 73   | 56   | -5.7506585 | -1.5759421 |
| 1921 | 36  | 174.6446 | -36.83333  | -25.8 | -82  | -35  | 0.22878243 | -0.0088695 |
| 1921 | 37  | 173.9552 | -33.499997 | -23   | -91  | -37  | 0.63346615 | 0.11634613 |
| 1921 | 38  | 185.6829 | -33.999997 | -24.4 | -85  | -33  | 0.18531366 | -0.0198125 |
| 1921 | 39  | 259.9316 | -32.83333  | -22.6 | -95  | -42  | 0.8839994  | 0.23381067 |
| 1921 | 40  | 166.5586 | -15.999997 | -23.2 | -40  | -81  | -1.8454838 | 0.67509855 |
| 1921 | 43  | 153.2348 | -33.08333  | -27.4 | 5    | 0    | -3.8498981 | -0.5541795 |
| 1921 | 44  | 160.2155 | -17.58333  | -10   | -169 | -58  | 4.17482642 | 0.70811795 |
| 1921 | 51  | 169.7544 | -44.58333  | -32.8 | -111 | -34  | -0.0905161 | -0.185383  |
| 1921 | 66  | 207.973  | -32.749997 | -23.4 | -163 | -36  | 2.4553025  | -0.0159039 |
| 1921 | 67  | 180.4536 | -42.499997 | -34   | -7   | 13   | -3.9705673 | -1.0142239 |
| 1921 | 69  | 160.8276 | -44.749997 | -38.6 | 7    | 8    | -5.6214687 | -1.0799714 |
| 1921 | 70  | 166.1441 | -44.749997 | -38.6 | 7    | 8    | -5.6214687 | -1.0799714 |
| 1921 | 73  | 183.8131 | -31.83333  | -25.6 | -56  | -18  | -1.0131738 | -0.2128701 |
| 1921 | 77  | 187.9714 | -36.08333  | -33   | 11   | 13   | -4.8698015 | -0.9597523 |
| 1921 | 80  | 160.0928 | -21.33333  | -13.8 | -104 | -37  | 2.06144186 | 0.37306505 |
| 1921 | 87  | 181.963  | -24.666663 | -13.4 | -221 | -59  | 4.93514408 | 0.59325159 |
| 1921 | 88  | 148.3846 | -49.999997 | -38   | -89  | -37  | -1.5677732 | -0.2948212 |
| 1921 | 90  | 169.4144 | -36.08333  | -28   | -6   | 8    | -3.1072645 | -0.7438032 |
| 1921 | 92  | 151.0652 | -34.666663 | -26.2 | -80  | -24  | -0.3743817 | -0.2538787 |
| 1921 | 93  | 160.729  | -38.499997 | -29   | -62  | -8   | -1.0925389 | -0.4514964 |
| 1921 | 94  | 193.3182 | -37.499997 | -30.4 | -300 | -146 | 4.32035835 | 0.92882433 |
| 1921 | 99  | 193.1714 | -21.08333  | -14.6 | -275 | -171 | 5.64736822 | 1.49512019 |
| 1921 | 104 | 122.1071 | -18.166663 | -17.8 | -240 | -128 | 4.53354376 | 1.16439504 |
| 1921 | 129 | 181.6154 | -32.249997 | -34.6 | -77  | -86  | -1.6934459 | 0.47749468 |
| 1921 | 130 | 159.2623 | -39.499997 | -42.4 | -14  | -60  | -5.031031  | -0.0408105 |
| 1921 | 135 | 187.4405 | -17.166663 | -23.6 | -87  | -99  | -0.4251265 | 0.84663534 |
| 1921 | 137 | 209.7788 | -35.249997 | -31   | -681 | -262 | 9.27879959 | 1.32282582 |
| 1921 | 138 | 164.96   | -43.58333  | -46   | -377 | -210 | 4.05238865 | 1.01287069 |
| 1921 | 144 | 185.8738 | -16.58333  | -21   | -124 | -120 | 1.69660575 | 1.15423416 |
| 1921 | 150 | 144.4884 | -29.499997 | -36   | 42   | -54  | -6.4244292 | 0.2445008  |
| 1923 | 11  | 141.1    | -12.500333 | 7.8   | -83  | 11   | 3.04812607 | 0.93992683 |
| 1923 | 18  | 131.4333 | -26.167    | -10.8 | 44   | 87   | -2.4207488 | -0.1996474 |
| 1923 | 23  | 146.3333 | -30.750333 | -19.4 | -210 | 6    | 2.48309295 | 0.36559189 |
| 1923 | 26  | 148.1    | -10.583667 | 5.8   | 148  | 150  | -3.8640607 | -0.7693158 |
| 1923 | 28  | 125.1333 | -9.8336667 | 1.8   | 181  | 165  | -7.0065385 | -1.3235861 |
| 1923 | 36  | 127.0333 | -19.667    | -5    | 26   | 74   | -1.0270976 | 0.24348649 |
| 1923 | 40  | 150.6667 | 1.16633333 | -2.4  | 68   | 28   | -3.1013638 | 0.92745455 |
| 1923 | 44  | 149.6333 | -0.417     | 10.8  | -61  | 51   | 2.91894642 | 0.96047395 |
| 1923 | 51  | 156.2667 | -27.417    | -12   | -3   | 75   | -1.3463961 | 0.06697305 |
| 1923 | 66  | 121.8    | -15.583667 | -2.6  | -55  | 73   | 1.1994225  | 0.23645205 |
| 1923 | 69  | 180.15   | -27.583667 | -17.8 | 115  | 117  | -6.8773487 | -0.8276154 |
| 1923 | 73  | 143.6667 | -14.667    | -4.8  | 52   | 91   | -2.2690538 | 0.03948588 |
| 1923 | 77  | 139.74   | -18.917    | -12.2 | 119  | 122  | -6.1256815 | -0.7073963 |
| 1923 | 80  | 187.7333 | -4.167     | 7     | 4    | 72   | 0.80556186 | 0.62542105 |
| 1923 | 87  | 163.0667 | -7.5003333 | 7.4   | -113 | 50   | 3.67926408 | 0.84560759 |
| 1923 | 92  | 122.2    | -17.500333 | -5.4  | 28   | 85   | -1.6302617 | -0.0015227 |

|      |     |          |            |       |      |      |            |            |
|------|-----|----------|------------|-------|------|------|------------|------------|
| 1923 | 93  | 132.3333 | -21.333667 | -8.2  | 46   | 101  | -2.3484189 | -0.1991404 |
| 1923 | 94  | 139.25   | -20.333667 | -9.6  | -192 | -37  | 3.06447835 | 1.18118033 |
| 1923 | 99  | 146.2    | -3.917     | 6.2   | -167 | -62  | 4.39148822 | 1.74747619 |
| 1923 | 104 | 144.5333 | -1.0003333 | 3     | -132 | -19  | 3.27766376 | 1.41675104 |
| 1923 | 129 | 142.7    | -15.083667 | -13.8 | 31   | 23   | -2.9493259 | 0.72985068 |
| 1923 | 130 | 163.2    | -22.333667 | -21.6 | 94   | 49   | -6.286911  | 0.21154545 |
| 1923 | 135 | 150.3    | -0.0003333 | -2.8  | 21   | 10   | -1.6810065 | 1.09899134 |
| 1923 | 137 | 179.5667 | -18.083667 | -10.2 | -573 | -153 | 8.02291959 | 1.57518182 |
| 1923 | 144 | 153.3    | 0.583      | -0.2  | -16  | -11  | 0.44072575 | 1.40659016 |
| 1923 | 150 | 156.1    | -12.333667 | -15.2 | 150  | 55   | -7.6803092 | 0.4968568  |
| 2001 | 1   | 347.9389 | -21.499997 | -13.6 | 44   | 64   | -3.2934629 | -1.9149164 |
| 2001 | 2   | 264.3878 | -25.499997 | -14.6 | 53   | 72   | -3.482954  | -2.3257542 |
| 2001 | 3   | 322.093  | -17.999997 | -13.4 | 79   | 48   | -4.4999593 | -1.4188592 |
| 2001 | 4   | 282.2581 | -30.416663 | -27.8 | -60  | -3   | -2.2256457 | -1.5200598 |
| 2001 | 6   | 269.5747 | -9.1666633 | -12.4 | -362 | -128 | 5.9507989  | 0.68907682 |
| 2001 | 8   | 299.9275 | -46.499997 | -43.2 | -35  | 34   | -5.0958573 | -2.9641427 |
| 2001 | 11  | 309.9281 | -1.08333   | 0.4   | -148 | -41  | 3.83032413 | 0.56078043 |
| 2001 | 13  | 293.3654 | -20.166663 | -16.4 | -77  | -6   | 0.74829857 | -0.3591952 |
| 2001 | 14  | 280.8861 | -14.999997 | -11   | -51  | -17  | 0.29391835 | -0.0203021 |
| 2001 | 15  | 324.4681 | -9.33333   | -3.6  | -69  | -19  | 1.90323816 | 0.11120154 |
| 2001 | 16  | 341.9444 | -30.33333  | -43.2 | 189  | 126  | -16.467819 | -4.8104999 |
| 2001 | 17  | 315.7377 | 20.7500033 | 37.8  | -185 | -30  | 8.58991348 | 1.19506445 |
| 2001 | 18  | 304.8252 | -12.08333  | 2.4   | 29   | 46   | -0.3443765 | -1.0570162 |
| 2001 | 20  | 297.7273 | 3.16667    | 17.6  | -328 | -68  | 8.63030368 | 0.87312135 |
| 2001 | 21  | 285.1471 | 1.41667    | 3.6   | -56  | -10  | 2.45499895 | 0.09020512 |
| 2001 | 22  | 298.4496 | -1.1666633 | -1.2  | 135  | 62   | -5.1564633 | -1.248563  |
| 2001 | 23  | 331.1888 | 1.58333667 | -0.6  | 101  | 53   | -3.8483666 | -1.0704271 |
| 2001 | 24  | 332.5532 | 4.16667    | 1.2   | 139  | 65   | -5.675479  | -1.248563  |
| 2001 | 25  | 267.0161 | 11.5833367 | 5     | -12  | 3    | 0.75786063 | -0.2803953 |
| 2001 | 26  | 370.9091 | -4.33333   | -8.6  | 68   | 21   | -3.9100865 | -0.5850434 |
| 2001 | 27  | 337.7273 | 1.75000333 | 2.6   | -210 | -75  | 5.45729328 | 0.94408406 |
| 2001 | 28  | 311.4844 | 3.00000333 | -2.2  | -44  | -25  | 0.86749901 | 0.29133062 |
| 2001 | 30  | 342.1739 | -5.9999967 | -13.6 | 174  | 53   | -9.5521853 | -1.2963818 |
| 2001 | 31  | 389.3056 | 5.25000333 | 0.6   | -154 | -132 | 3.72917596 | 1.38346511 |
| 2001 | 32  | 299.7959 | -0.4999967 | -8    | 50   | 4    | -3.0786045 | -0.2307059 |
| 2001 | 34  | 337.9643 | -11.166663 | -14.6 | -163 | -113 | 2.13232657 | 0.78444566 |
| 2001 | 35  | 315.1563 | 56.41667   | 50.8  | -789 | -452 | 14.696555  | 3.29905605 |
| 2001 | 36  | 321.295  | 40.2500033 | 30.4  | -449 | -318 | 10.774843  | 2.74966646 |
| 2001 | 37  | 349.1216 | -42.916663 | -49.6 | -516 | -231 | 4.8307469  | 0.60021977 |
| 2001 | 38  | 248.75   | 21.3333367 | 10.4  | 111  | 3    | -2.82313   | 0.21551746 |
| 2001 | 39  | 342.5362 | 7.75000333 | -6.6  | -140 | -182 | 2.40544143 | 1.59262917 |
| 2001 | 40  | 278.125  | 24.16667   | 15.6  | -130 | -98  | 4.95143647 | 1.46229013 |
| 2001 | 46  | 292.1488 | 2.25000333 | 1.2   | -43  | -39  | 1.4827826  | 0.62894327 |
| 2001 | 48  | 280.1626 | 36.5833367 | 31    | -34  | -79  | 5.01172046 | 1.72178068 |
| 2001 | 49  | 302.8226 | 11.7500033 | 0.4   | -80  | -127 | 2.17687    | 1.35057493 |
| 2001 | 50  | 280      | 29.66667   | 23.4  | -82  | -76  | 5.04100709 | 1.48164062 |
| 2001 | 51  | 294.4697 | 34.5000033 | 26.4  | -389 | -232 | 9.89928993 | 2.3969288  |
| 2001 | 52  | 336.8345 | -14.416663 | -30.2 | 47   | -18  | -6.1661533 | -0.6045413 |
| 2001 | 53  | 315.5319 | 12.16667   | 6.8   | -610 | -248 | 10.2066098 | 1.82327356 |
| 2001 | 59  | 371.2838 | 10.0833367 | -12.8 | 114  | -32  | -6.6476067 | 0.27320317 |



|      |    |          |            |       |      |      |            |            |
|------|----|----------|------------|-------|------|------|------------|------------|
| 2001 | 60 | 277.9259 | 21.0833367 | 6.2   | -47  | -109 | 1.84438918 | 1.40627239 |
| 2001 | 64 | 282.5191 | 4.91667    | -6.4  | 177  | 3    | -8.4682913 | -0.0688539 |
| 2001 | 67 | 286.0714 | 21.3333367 | 10.4  | 111  | 3    | -2.82313   | 0.21551746 |
| 2001 | 70 | 302.2222 | 4.58333667 | -7    | 47   | -68  | -2.5324323 | 0.76798951 |
| 2001 | 71 | 298.7879 | -4.4166633 | -8.2  | 139  | 44   | -6.8499756 | -1.0129073 |
| 2002 | 6  | 132.1717 | -4.7500033 | -4.2  | -501 | -172 | 12.7939289 | 1.70198382 |
| 2002 | 8  | 166.0119 | -42.083337 | -35   | -174 | -10  | 1.74727273 | -1.9512357 |
| 2002 | 13 | 148.1633 | -15.750003 | -8.2  | -216 | -50  | 7.59142857 | 0.65371182 |
| 2002 | 14 | 177.5735 | -10.583337 | -2.8  | -190 | -61  | 7.13704835 | 0.99260487 |
| 2002 | 17 | 128.5616 | 25.1666633 | 46    | -324 | -74  | 15.4330435 | 2.20797145 |
| 2002 | 21 | 144.3333 | 5.83333    | 11.8  | -195 | -54  | 9.29812895 | 1.10311212 |
| 2002 | 23 | 139.1573 | 5.99999667 | 7.6   | -38  | 9    | 2.99476341 | -0.0575201 |
| 2002 | 26 | 156.3043 | 0.08333    | -0.4  | -71  | -23  | 2.93304348 | 0.42786364 |
| 2002 | 31 | 198.3475 | 9.66666333 | 8.8   | -293 | -176 | 10.572306  | 2.39637211 |
| 2002 | 35 | 134.8193 | 60.83333   | 59    | -928 | -496 | 21.539685  | 4.31196305 |
| 2002 | 64 | 149.3382 | 40.9999967 | 39.2  | -173 | -123 | 11.8548505 | 2.73468768 |
| 2002 | 48 | 165.339  | 38.9166633 | 34.6  | -528 | -276 | 16.7424199 | 3.4098358  |
| 2002 | 51 | 145.0962 | 16.58333   | 15    | -749 | -292 | 17.0497398 | 2.83618056 |
| 2002 | 53 | 158.6957 | 25.4999967 | 14.4  | -186 | -153 | 8.68751918 | 2.41917939 |
| 2002 | 60 | 135.2913 | 9.33333    | 1.8   | 38   | -41  | -1.6251613 | 0.94405314 |
| 2002 | 67 | 115.5    | 25.7499967 | 18.6  | -28  | -41  | 4.02       | 1.22842446 |
| 2002 | 71 | 199.1489 | -3.333E-06 | 0     | 0    | 0    | -0.0068456 | -2.623E-07 |
| 2007 | 1  | 240.1681 | -20.499997 | -12   | 27   | 60   | -2.4898329 | -1.7920904 |
| 2007 | 2  | 234.375  | -24.499997 | -13   | 36   | 68   | -2.679324  | -2.2029282 |
| 2007 | 3  | 242.1138 | -16.999997 | -11.8 | 62   | 44   | -3.6963293 | -1.2960332 |
| 2007 | 4  | 173.2075 | -29.416663 | -26.2 | -77  | -7   | -1.4220157 | -1.3972338 |
| 2007 | 5  | 247.6515 | -28.33333  | -10.2 | -37  | 48   | 0.59639404 | -1.6469634 |
| 2007 | 6  | 238.5345 | -8.1666633 | -10.8 | -379 | -132 | 6.7544289  | 0.81190282 |
| 2007 | 19 | 227.9286 | -19.58333  | -6.2  | -104 | 41   | 2.29923479 | -1.5428718 |
| 2007 | 20 | 239.3913 | 4.16667    | 19.2  | -345 | -72  | 9.43393368 | 0.99594735 |
| 2007 | 23 | 241.1189 | 2.58333667 | 1     | 84   | 49   | -3.0447366 | -0.9476011 |
| 2007 | 25 | 210.96   | 12.5833367 | 6.6   | -29  | -1   | 1.56149063 | -0.1575693 |
| 2007 | 26 | 228      | -3.33333   | -7    | 51   | 17   | -3.1064565 | -0.4622174 |
| 2007 | 30 | 241.3077 | -4.9999967 | -12   | 157  | 49   | -8.7485553 | -1.1735558 |
| 2007 | 31 | 246.8367 | 6.25000333 | 2.2   | -171 | -136 | 4.53280596 | 1.50629111 |
| 2007 | 36 | 259.1129 | 41.2500033 | 32    | -466 | -322 | 11.578473  | 2.87249246 |
| 2007 | 37 | 289.1034 | -41.916663 | -48   | -533 | -235 | 5.6343769  | 0.72304577 |
| 2007 | 38 | 279.0625 | 22.3333367 | 12    | 94   | -1   | -2.0195    | 0.33834346 |
| 2007 | 43 | 252.8906 | 22.0833367 | 7.8   | -64  | -113 | 2.64801918 | 1.52909839 |
| 2007 | 49 | 268.8722 | 12.7500033 | 2     | -97  | -131 | 2.9805     | 1.47340093 |
| 2007 | 51 | 256.3281 | 35.5000033 | 28    | -406 | -236 | 10.7029199 | 2.5197548  |
| 2007 | 65 | 195.6296 | 0.91667    | -15.4 | 7    | -102 | -2.8985436 | 0.98884633 |
| 2012 | 1  | 271.7654 | 0.08333333 | 18.8  | 570  | 271  | -9.6099029 | -2.7627274 |
| 2012 | 2  | 193.5246 | -3.9166667 | 17.8  | 579  | 279  | -9.799394  | -3.1735652 |
| 2012 | 5  | 199.8929 | -7.75      | 20.6  | 506  | 259  | -6.523676  | -2.6176004 |
| 2012 | 6  | 219.2432 | 12.4166667 | 20    | 164  | 79   | -0.3656411 | -0.1587342 |
| 2012 | 8  | 263.5556 | -24.916667 | -10.8 | 491  | 241  | -11.412297 | -3.8119537 |
| 2012 | 11 | 190.32   | 20.5       | 32.8  | 378  | 166  | -2.4861159 | -0.2870306 |
| 2012 | 13 | 211.4823 | 1.41666667 | 16    | 449  | 201  | -5.5681414 | -1.2070062 |
| 2012 | 14 | 225.4783 | 6.58333333 | 21.4  | 475  | 190  | -6.0225217 | -0.8681131 |

|      |    |          |            |       |      |      |            |            |
|------|----|----------|------------|-------|------|------|------------|------------|
| 2012 | 15 | 213.2927 | 12.25      | 28.8  | 457  | 188  | -4.4132018 | -0.7366095 |
| 2012 | 17 | 194.3333 | 42.3333333 | 70.2  | 341  | 177  | 2.27347348 | 0.34725345 |
| 2012 | 21 | 178.0806 | 23         | 36    | 470  | 197  | -3.861441  | -0.7576059 |
| 2012 | 23 | 184.6522 | 23.1666667 | 31.8  | 627  | 260  | -10.164807 | -1.9182381 |
| 2012 | 27 | 196.4265 | 23.3333333 | 35    | 316  | 132  | -0.8591467 | 0.09627306 |
| 2012 | 31 | 195.8136 | 26.8333333 | 33    | 372  | 75   | -2.587264  | 0.53565411 |
| 2012 | 32 | 229.6207 | 21.0833333 | 24.4  | 576  | 211  | -9.3950445 | -1.0785169 |
| 2012 | 34 | 257.7273 | 10.4166667 | 17.8  | 363  | 94   | -4.1841134 | -0.0633653 |
| 2012 | 35 | 210.3929 | 78         | 83.2  | -263 | -245 | 8.38011504 | 2.45124505 |
| 2012 | 36 | 237.9697 | 61.8333333 | 62.8  | 77   | -111 | 4.45840297 | 1.90185546 |
| 2012 | 37 | 290.2941 | -21.333333 | -17.2 | 10   | -24  | -1.4856931 | -0.2475912 |
| 2012 | 38 | 207.7292 | 42.9166667 | 42.8  | 637  | 210  | -9.13957   | -0.6322935 |
| 2012 | 39 | 267.8966 | 29.3333333 | 25.8  | 386  | 25   | -3.9109986 | 0.74481817 |
| 2012 | 40 | 232.8772 | 23.8333333 | 33.6  | 483  | 168  | -4.8336574 | -0.2188677 |
| 2012 | 43 | 230.4426 | 42.6666667 | 38.6  | 479  | 98   | -4.4720508 | 0.55846139 |
| 2012 | 46 | 215.9815 | 45.75      | 48    | 396  | 109  | -1.3650035 | 0.61447913 |
| 2012 | 48 | 205.129  | 58.1666667 | 63.4  | 492  | 128  | -1.3047195 | 0.87396968 |
| 2012 | 49 | 231.3671 | 33.3333333 | 32.8  | 446  | 80   | -4.13957   | 0.50276393 |
| 2012 | 51 | 214.9383 | 56.0833333 | 58.8  | 137  | -25  | 3.58284993 | 1.5491178  |
| 2012 | 53 | 242.8426 | 33.75      | 39.2  | -84  | -41  | 3.89016978 | 0.97546256 |
| 2012 | 54 | 246.029  | 30.75      | 35.6  | -56  | -68  | 3.3319562  | 1.08822865 |
| 2012 | 55 | 207.1538 | 16.6666667 | 20.8  | -86  | -38  | 2.49740105 | 0.58866184 |
| 2012 | 61 | 172.1084 | 42.6666667 | 38.6  | 479  | 98   | -4.4720508 | 0.55846139 |
| 2012 | 64 | 220.6962 | 26.5       | 26    | 703  | 210  | -14.784731 | -0.9166649 |
| 2012 | 65 | 204.7097 | 21.5       | 15.4  | 550  | 109  | -10.018614 | 0.01820933 |
| 2012 | 67 | 210.5238 | 42.9166667 | 42.8  | 637  | 210  | -9.13957   | -0.6322935 |
| 2012 | 69 | 229.6706 | 31.0833333 | 27.8  | 367  | 13   | -3.2670868 | 0.85688687 |
| 2012 | 77 | 199.4304 | 17.9166667 | 26.6  | 454  | 260  | -5.7009083 | -3.0307125 |
| 2012 | 84 | 202.8451 | 11.9166667 | 7.6   | 602  | 196  | -12.667643 | -1.330963  |
| 2022 | 2  | 146.6964 | -5.3366667 | 10.2  | 98   | 145  | -1.259824  | -2.5286622 |
| 2022 | 4  | 143.3019 | -10.253333 | -3    | -15  | 70   | -0.0025157 | -1.7229678 |
| 2022 | 6  | 178.6207 | 10.9966667 | 12.4  | -317 | -55  | 8.1739289  | 0.48616882 |
| 2022 | 13 | 160.0769 | -0.0033333 | 8.4   | -32  | 67   | 2.97142857 | -0.5621032 |
| 2022 | 14 | 159.6032 | 5.16333333 | 13.8  | -6   | 56   | 2.51704835 | -0.2232101 |
| 2022 | 16 | 202.3881 | -10.17     | -18.4 | 234  | 199  | -14.244689 | -5.0134079 |
| 2022 | 17 | 149.0164 | 40.9133333 | 62.6  | -140 | 43   | 10.8130435 | 0.99215645 |
| 2022 | 21 | 167.5373 | 21.58      | 28.4  | -11  | 63   | 4.67812895 | -0.1127029 |
| 2022 | 23 | 137.6667 | 21.7466667 | 24.2  | 146  | 126  | -1.6252366 | -1.2733351 |
| 2022 | 26 | 197.5    | 15.83      | 16.2  | 113  | 94   | -1.6869565 | -0.7879514 |
| 2022 | 31 | 206.6667 | 25.4133333 | 25.4  | -109 | -59  | 5.95230596 | 1.18055711 |
| 2022 | 34 | 227.197  | 8.99666667 | 10.2  | -118 | -40  | 4.35545657 | 0.58153766 |
| 2022 | 35 | 218.0303 | 76.58      | 75.6  | -744 | -379 | 16.919685  | 3.09614805 |
| 2022 | 48 | 176.2295 | 56.7466667 | 55.8  | 11   | -6   | 7.23485046 | 1.51887268 |
| 2022 | 51 | 168.6364 | 54.6633333 | 51.2  | -344 | -159 | 12.1224199 | 2.1940208  |
| 2022 | 52 | 206.1268 | 5.74666667 | -5.4  | 92   | 55   | -3.9430233 | -0.8074493 |
| 2022 | 53 | 150.6452 | 32.33      | 31.6  | -565 | -175 | 12.4297398 | 1.62036556 |
| 2022 | 60 | 177.971  | 41.2466667 | 31    | -2   | -36  | 4.06751918 | 1.20336439 |
| 2022 | 64 | 178.3065 | 25.08      | 18.4  | 222  | 76   | -6.2451613 | -0.2717619 |
| 2022 | 67 | 166.5909 | 41.4966667 | 35.2  | 156  | 76   | -0.6       | 0.01260946 |
| 2025 | 5  | 234.918  | -21.4167   | 3.6   | -218 | -9   | 11.135444  | -0.2197554 |

|      |    |          |            |       |      |      |            |            |
|------|----|----------|------------|-------|------|------|------------|------------|
| 2025 | 6  | 175.566  | -1.2500333 | 3     | -560 | -189 | 17.2934789 | 2.23911082 |
| 2025 | 13 | 150.9474 | -12.250033 | -1    | -275 | -67  | 12.0909786 | 1.19083882 |
| 2025 | 17 | 179.4949 | 28.6666333 | 53.2  | -383 | -91  | 19.9325935 | 2.74509845 |
| 2025 | 19 | 170.198  | -12.6667   | 7.6   | -285 | -16  | 12.8382848 | -0.1156638 |
| 2025 | 23 | 106.1194 | 9.49996667 | 14.8  | -97  | -8   | 7.49431341 | 0.47960689 |
| 2025 | 25 | 174.7619 | 19.4999667 | 20.4  | -210 | -58  | 12.1005406 | 1.2696387  |
| 2025 | 30 | 171.3559 | 1.91663333 | 1.8   | -24  | -8   | 1.79049474 | 0.25365221 |
| 2025 | 31 | 141.8605 | 13.1666333 | 16    | -352 | -193 | 15.071856  | 2.93349911 |
| 2025 | 38 | 187.8723 | 29.2499667 | 25.8  | -87  | -58  | 8.51955    | 1.76555146 |
| 2025 | 49 | 193.8525 | 7.8333     | -1.6  | -174 | -159 | 7.6405064  | 2.41605433 |
| 2025 | 51 | 190.2655 | 19.6666333 | 15.8  | -278 | -188 | 13.51955   | 2.90060893 |
| 2025 | 65 | 230.155  | 42.4166333 | 41.8  | -587 | -293 | 21.2419699 | 3.9469628  |
| 2026 | 5  | 186.2069 | -27.67     | -11.4 | 222  | 115  | -5.802736  | -2.4597964 |
| 2026 | 7  | 190      | -18.503333 | -16   | 165  | 57   | -4.8472014 | -1.0492022 |
| 2026 | 9  | 194.7748 | -6.7533333 | -8.6  | 136  | 43   | -3.9893791 | -0.7467656 |
| 2026 | 12 | 129.6262 | -13.336667 | -10.6 | 191  | 46   | -5.3015817 | -0.7103091 |
| 2026 | 13 | 179.7479 | -7.67      | -3.2  | 173  | 44   | -3.6922618 | -0.5788055 |
| 2026 | 14 | 168.3838 | -10.42     | 2.8   | 271  | 109  | -5.9398765 | -1.7470232 |
| 2026 | 15 | 200.0704 | 3.24666667 | -0.2  | 343  | 116  | -9.4438666 | -1.7604341 |
| 2026 | 18 | 191.5596 | 13.2466667 | 5.4   | 230  | 66   | -4.8376394 | -0.9704023 |
| 2026 | 23 | 159.68   | 3.41333333 | 3     | 32   | -12  | -0.1382067 | 0.25407706 |
| 2026 | 25 | 153.9063 | 4.66333333 | -1.8  | 198  | 38   | -4.728001  | -0.3986764 |
| 2026 | 27 | 148.3636 | -4.7533333 | -8.4  | 202  | 56   | -5.4831461 | -0.8926298 |
| 2026 | 28 | 167.1053 | 6.91333333 | 1     | 88   | -69  | -1.866324  | 0.69345811 |
| 2026 | 29 | 147.6344 | 22.9966667 | 10.8  | 353  | 66   | -8.41863   | -0.4744895 |
| 2026 | 31 | 149.8925 | 22.08      | 11.2  | 51   | -110 | -0.0492995 | 1.20261705 |
| 2026 | 38 | 153.5593 | 22.6633333 | 13.2  | 268  | -16  | -4.5751885 | 0.64347846 |
| 2026 | 41 | 165.6881 | 5.16333333 | -6    | 403  | 49   | -13.209571 | -0.5138318 |
| 2026 | 42 | 210.3509 | 6.24666667 | -6.6  | 289  | -5   | -8.1279323 | 0.07798251 |
| 2026 | 44 | 144.4681 | -9.67      | -27   | 307  | 89   | -12.672361 | -2.1992167 |
| 2026 | 45 | 155.0943 | -2.0033333 | -5.4  | 170  | 116  | -4.9799683 | -2.8729085 |
| 2026 | 47 | 164.2857 | -56.42     | -55.8 | 382  | 279  | -21.233756 | -2.4007793 |
| 2026 | 61 | 161.4414 | -6.8366667 | -23   | 418  | 103  | -17.229006 | -1.8735388 |
| 2026 | 70 | 176.2879 | 22.7466667 | 6.6   | 195  | -46  | -3.7511108 | 0.71626539 |
| 2026 | 78 | 172.126  | -9.8366667 | -7.2  | 191  | 4    | -5.1743552 | -0.4450133 |
| 2026 | 81 | 177.9412 | 1.83       | 5.2   | 170  | 0    | -3.245148  | -0.182741  |

| xED       | yED      | LatED | bio1 | bio2 | bio3 | bio4 | bio5 | bio6 |
|-----------|----------|-------|------|------|------|------|------|------|
| 12.53     | 11.48333 | -1160 | 98   | 97   | 39   | 5254 | 239  | -6   |
| 13.03     | 12.05    | -400  | 103  | 105  | 38   | 5766 | 260  | -11  |
| 7.91333   | 11.38333 | -910  | 122  | 88   | 35   | 5663 | 260  | 10   |
| 8.39667   | 4.05     | -630  | 103  | 70   | 34   | 5001 | 215  | 10   |
| 11.44667  | 5.91667  | -28   | 106  | 81   | 38   | 4712 | 223  | 15   |
| 7.68      | 5.01667  | -480  | 102  | 85   | 36   | 5538 | 234  | -2   |
| 7.59667   | 8.7      | -120  | 80   | 97   | 39   | 5437 | 218  | -29  |
| 7.33      | 8.11667  | -860  | 92   | 98   | 39   | 5595 | 231  | -20  |
| 5.91333   | 7.41667  | -535  | 94   | 76   | 31   | 6048 | 225  | -17  |
| 7.64667   | 10.15    | -495  | 103  | 101  | 38   | 5709 | 251  | -11  |
| 5.01333   | 5.68333  | -210  | 94   | 86   | 34   | 5925 | 226  | -20  |
| 4.03      | 7.1      | -1310 | 85   | 87   | 33   | 6240 | 226  | -33  |
| 3.81333   | 6.71667  | -240  | 98   | 95   | 35   | 6290 | 246  | -22  |
| -0.65333  | -0.83333 | -280  | 83   | 47   | 22   | 5893 | 193  | -14  |
| 0.69667   | -0.61667 | 20    | 79   | 60   | 27   | 5758 | 195  | -22  |
| -0.40333  | -0.88333 | -10   | 78   | 51   | 24   | 5831 | 191  | -18  |
| -2.97     | -1.75    | -30   | 76   | 62   | 26   | 6264 | 202  | -34  |
| -4.32     | -1.78333 | -120  | 77   | 60   | 25   | 6240 | 205  | -26  |
| -0.47     | 0.1      | -50   | 79   | 66   | 28   | 6126 | 203  | -31  |
| -0.38667  | 0.7      | -40   | 85   | 79   | 31   | 6368 | 225  | -28  |
| -2.22     | 0.55     | -720  | 81   | 66   | 26   | 6363 | 211  | -35  |
| 1.48      | 1.06667  | 15    | 87   | 79   | 33   | 5948 | 217  | -19  |
| 0.78      | 2.05     | 15    | 84   | 80   | 33   | 6004 | 215  | -25  |
| 0.74667   | 1        | -1010 | 84   | 82   | 33   | 6107 | 219  | -27  |
| 0.58      | 2.5      | -3    | 83   | 81   | 33   | 6056 | 215  | -28  |
| -12.05333 | 4.83333  | -366  | 78   | 82   | 33   | 6107 | 211  | -34  |
| -0.23667  | 1.06667  | -265  | 83   | 84   | 32   | 6449 | 228  | -32  |
| -0.55333  | 2.63333  | -35   | 68   | 74   | 30   | 6245 | 200  | -42  |
| -2.88667  | 1.3      | -110  | 85   | 77   | 29   | 6707 | 227  | -33  |
| 4.03      | 3.75     | -30   | 73   | 68   | 31   | 5640 | 190  | -28  |
| 3.68      | 3.78333  | -500  | 76   | 70   | 31   | 5718 | 196  | -27  |
| 2.83      | 3.53333  | -495  | 95   | 81   | 33   | 5870 | 226  | -13  |
| 2.83      | 3.53333  | -265  | 95   | 81   | 33   | 5870 | 226  | -13  |
| 2.78      | 2.16667  | -260  | 93   | 77   | 33   | 5669 | 218  | -10  |
| 1.96333   | 3.2      | -5    | 65   | 67   | 29   | 5874 | 189  | -39  |
| 1.54667   | 3.1      | -585  | 78   | 72   | 30   | 6013 | 207  | -31  |
| 1.58      | 2.76667  | -285  | 80   | 71   | 30   | 5831 | 206  | -26  |
| 1.58      | 2.76667  | -400  | 80   | 71   | 30   | 5831 | 206  | -26  |
| 1.19667   | 2.76667  | -340  | 87   | 75   | 31   | 6015 | 218  | -23  |
| 2.01333   | 3.56667  | -340  | 83   | 76   | 31   | 6111 | 216  | -26  |
| 2.21333   | 3.85     | -460  | 93   | 80   | 32   | 6183 | 229  | -19  |
| 1.18      | 3.26667  | -178  | 75   | 76   | 31   | 6199 | 208  | -37  |
| 1.16333   | 4.01667  | -10   | 95   | 87   | 32   | 6462 | 239  | -25  |
| 1.16333   | 4.01667  | -158  | 95   | 87   | 32   | 6462 | 239  | -25  |
| 0.64667   | 3.98333  | -185  | 82   | 87   | 32   | 6476 | 224  | -40  |
| 0.64667   | 3.98333  | -385  | 82   | 87   | 32   | 6476 | 224  | -40  |
| 0.64667   | 3.98333  | -390  | 82   | 87   | 32   | 6476 | 224  | -40  |
| 0.61333   | 3.96667  | -425  | 80   | 88   | 33   | 6509 | 223  | -43  |
| 0.61333   | 3.16667  | -450  | 77   | 82   | 32   | 6226 | 212  | -37  |

|           |          |       |     |     |    |      |     |     |
|-----------|----------|-------|-----|-----|----|------|-----|-----|
| 0.19667   | 3.56667  | -318  | 70  | 89  | 34 | 6279 | 212 | -47 |
| 0.19667   | 4.21667  | -515  | 86  | 91  | 32 | 6713 | 238 | -38 |
| -0.22     | 2.96667  | -575  | 72  | 81  | 32 | 6271 | 207 | -42 |
| -2.93667  | 3.63333  | -440  | 66  | 73  | 28 | 6685 | 205 | -51 |
| -3.28667  | 3.35     | -500  | 74  | 73  | 28 | 6734 | 213 | -44 |
| 3.46333   | 4.61667  | -325  | 75  | 81  | 33 | 5928 | 208 | -34 |
| 3.28      | 3.55     | -500  | 100 | 83  | 34 | 5818 | 233 | -8  |
| 3.33      | 4.65     | -620  | 77  | 85  | 34 | 5898 | 213 | -32 |
| 2.26333   | 4.63333  | -610  | 86  | 83  | 32 | 6231 | 224 | -29 |
| 2.33      | 4.93333  | -360  | 85  | 85  | 33 | 6220 | 223 | -32 |
| 2.33      | 4.93333  | -400  | 85  | 85  | 33 | 6220 | 223 | -32 |
| 2.44667   | 3.86667  | -365  | 89  | 78  | 32 | 6092 | 222 | -21 |
| 2.36333   | 6.1      | 0     | 88  | 83  | 32 | 6330 | 229 | -29 |
| 0.84667   | 5.9      | -405  | 75  | 85  | 32 | 6401 | 217 | -44 |
| 1.28      | 5.63333  | -690  | 87  | 87  | 33 | 6379 | 229 | -33 |
| 0.03      | 5.68333  | -460  | 82  | 85  | 31 | 6658 | 227 | -39 |
| 0.78      | 5.9      | -510  | 71  | 84  | 32 | 6383 | 213 | -46 |
| -0.27     | 4.43333  | -580  | 81  | 89  | 32 | 6648 | 230 | -41 |
| -0.30333  | 6.38333  | -350  | 73  | 86  | 32 | 6437 | 213 | -50 |
| -2.07     | 4.68333  | -660  | 69  | 82  | 30 | 6920 | 214 | -58 |
| -2.22     | 4.63333  | -620  | 66  | 81  | 29 | 6876 | 212 | -59 |
| -2.95333  | 5.28333  | -598  | 68  | 90  | 31 | 7023 | 219 | -66 |
| -1.93667  | 8.16667  | 15    | 109 | 104 | 33 | 7187 | 270 | -40 |
| -5.18667  | 6.55     | -1110 | 38  | 86  | 31 | 6774 | 186 | -90 |
| -2.33667  | 4.26667  | -1010 | 58  | 78  | 29 | 6671 | 200 | -61 |
| -3.97     | 5.45     | -650  | 59  | 90  | 32 | 6866 | 209 | -71 |
| -10.62    | 4.88333  | -480  | 45  | 86  | 29 | 7138 | 194 | -97 |
| -11.38667 | 4.78333  | -810  | 66  | 88  | 27 | 7925 | 225 | -91 |
| -10.35333 | 4.31667  | -620  | 85  | 92  | 28 | 8037 | 246 | -77 |
| -6.55333  | 4.05     | -310  | 49  | 77  | 29 | 6572 | 184 | -75 |
| -6.68667  | 3.65     | -925  | 80  | 89  | 31 | 6920 | 228 | -53 |
| -9.32     | 2.46667  | -715  | 76  | 82  | 26 | 8206 | 237 | -77 |
| -11.27194 | 5.40047  | -140  | 80  | 94  | 29 | 7835 | 243 | -75 |
| -8.30827  | 5.46614  | -380  | 80  | 99  | 31 | 7470 | 242 | -69 |
| -12.11179 | 5.40078  | -178  | 81  | 90  | 28 | 7866 | 240 | -74 |
| -7.08667  | 5.81667  | -302  | 82  | 92  | 30 | 7270 | 241 | -56 |
| -7.72     | 5.41667  | -168  | 90  | 96  | 31 | 7388 | 250 | -55 |
| -9.78667  | 5.55     | -335  | 56  | 94  | 31 | 7179 | 207 | -91 |
| -11.55333 | 5.01667  | -560  | 67  | 89  | 28 | 7900 | 227 | -89 |
| -3.62     | 8.3      | -903  | 71  | 83  | 30 | 6544 | 216 | -54 |
| -4.03667  | 8.55     | -835  | 85  | 79  | 29 | 6602 | 231 | -35 |
| -5.32     | 8        | -1060 | 94  | 96  | 31 | 7290 | 253 | -51 |
| -4.02     | 8.96667  | -380  | 144 | 74  | 29 | 6301 | 283 | 32  |
| -9.22     | 5.66667  | -362  | 49  | 90  | 30 | 7061 | 198 | -93 |
| -9.22     | 5.66667  | -1124 | 49  | 90  | 30 | 7061 | 198 | -93 |
| -13.91958 | 6.25031  | -390  | 67  | 92  | 30 | 7542 | 220 | -85 |
| -11.87    | 7.81667  | -495  | 98  | 97  | 31 | 7672 | 260 | -52 |
| -11.98667 | 7.61667  | -535  | 105 | 100 | 31 | 7808 | 269 | -49 |
| -14.72    | 7.71667  | -135  | 80  | 105 | 32 | 7818 | 240 | -88 |
| -13.98667 | 11.38333 | -960  | 83  | 96  | 31 | 7516 | 244 | -64 |

|           |          |       |     |     |    |      |     |     |
|-----------|----------|-------|-----|-----|----|------|-----|-----|
| 8.63      | 8.83333  | -1160 | 98  | 97  | 39 | 5254 | 239 | -6  |
| 9.13      | 9.4      | -400  | 103 | 105 | 38 | 5766 | 260 | -11 |
| 4.01333   | 8.73333  | -910  | 122 | 88  | 35 | 5663 | 260 | 10  |
| 4.49667   | 1.4      | -630  | 103 | 70  | 34 | 5001 | 215 | 10  |
| 7.54667   | 3.26667  | -28   | 106 | 81  | 38 | 4712 | 223 | 15  |
| 3.78      | 2.36667  | -480  | 102 | 85  | 36 | 5538 | 234 | -2  |
| 3.69667   | 6.05     | -120  | 80  | 97  | 39 | 5437 | 218 | -29 |
| 2.01333   | 4.76667  | -535  | 94  | 76  | 31 | 6048 | 225 | -17 |
| 3.74667   | 7.5      | -495  | 103 | 101 | 38 | 5709 | 251 | -11 |
| 1.18      | 3.96667  | -810  | 92  | 80  | 32 | 6161 | 228 | -21 |
| 1.11333   | 3.03333  | -210  | 94  | 86  | 34 | 5925 | 226 | -20 |
| 0.13      | 4.45     | -1310 | 85  | 87  | 33 | 6240 | 226 | -33 |
| 1.01333   | 2.05     | -100  | 92  | 82  | 34 | 5814 | 223 | -14 |
| -0.08667  | 4.06667  | -240  | 98  | 95  | 35 | 6290 | 246 | -22 |
| -4.55333  | -3.48333 | -280  | 83  | 47  | 22 | 5893 | 193 | -14 |
| -3.20333  | -3.26667 | 20    | 79  | 60  | 27 | 5758 | 195 | -22 |
| -4.30333  | -3.53333 | -10   | 78  | 51  | 24 | 5831 | 191 | -18 |
| -6.87     | -4.4     | -30   | 76  | 62  | 26 | 6264 | 202 | -34 |
| -8.22     | -4.43333 | -120  | 77  | 60  | 25 | 6240 | 205 | -26 |
| -4.37     | -2.55    | -50   | 79  | 66  | 28 | 6126 | 203 | -31 |
| -6.12     | -2.1     | -720  | 81  | 66  | 26 | 6363 | 211 | -35 |
| -2.42     | -1.58333 | 15    | 87  | 79  | 33 | 5948 | 217 | -19 |
| -3.12     | -0.6     | 15    | 84  | 80  | 33 | 6004 | 215 | -25 |
| -3.15333  | -1.65    | -1010 | 84  | 82  | 33 | 6107 | 219 | -27 |
| -3.32     | -0.15    | -3    | 83  | 81  | 33 | 6056 | 215 | -28 |
| -3.45333  | 0.15     | -320  | 78  | 82  | 33 | 6107 | 211 | -34 |
| -15.95333 | 2.18333  | -366  | 77  | 79  | 31 | 6296 | 212 | -36 |
| -4.25333  | 0.05     | -265  | 83  | 84  | 32 | 6449 | 228 | -32 |
| -4.13667  | -1.58333 | -265  | 68  | 74  | 30 | 6245 | 200 | -42 |
| -4.45333  | -0.01667 | -35   | 85  | 77  | 29 | 6707 | 227 | -33 |
| -6.78667  | -1.35    | -110  | 87  | 78  | 28 | 7005 | 232 | -39 |
| -7.52     | -1.23333 | -30   | 73  | 68  | 31 | 5640 | 190 | -28 |
| 0.13      | 1.1      | -30   | 75  | 70  | 31 | 5751 | 195 | -29 |
| -0.25333  | 1.26667  | -455  | 95  | 81  | 33 | 5870 | 226 | -13 |
| -1.07     | 0.88333  | -495  | 95  | 81  | 33 | 5870 | 226 | -13 |
| -1.07     | 0.88333  | -265  | 93  | 77  | 33 | 5669 | 218 | -10 |
| -1.12     | -0.48333 | -260  | 65  | 67  | 29 | 5874 | 189 | -39 |
| -1.93667  | 0.55     | -5    | 78  | 72  | 30 | 6013 | 207 | -31 |
| -2.35333  | 0.45     | -585  | 81  | 71  | 30 | 5818 | 207 | -24 |
| -7.97     | 5.91667  | -273  | 80  | 71  | 30 | 5831 | 206 | -26 |
| -2.12     | 0.15     | -10   | 80  | 71  | 30 | 5831 | 206 | -26 |
| -2.32     | 0.11667  | -285  | 87  | 75  | 31 | 6015 | 218 | -23 |
| -2.32     | 0.11667  | -400  | 86  | 76  | 31 | 5909 | 215 | -23 |
| -2.70333  | 0.11667  | -340  | 83  | 76  | 31 | 6111 | 216 | -26 |
| -2.72     | -0.26667 | -265  | 93  | 80  | 32 | 6183 | 229 | -19 |
| -1.88667  | 0.91667  | -340  | 75  | 76  | 31 | 6199 | 208 | -37 |
| -1.68667  | 1.2      | -460  | 95  | 87  | 32 | 6462 | 239 | -25 |
| -2.72     | 0.61667  | -178  | 95  | 87  | 32 | 6462 | 239 | -25 |
| -2.73667  | 1.36667  | -10   | 82  | 87  | 32 | 6476 | 224 | -40 |
| -2.73667  | 1.36667  | -158  | 82  | 87  | 32 | 6476 | 224 | -40 |

|           |          |       |     |     |    |      |     |     |
|-----------|----------|-------|-----|-----|----|------|-----|-----|
| -3.25333  | 1.33333  | -185  | 82  | 87  | 32 | 6476 | 224 | -40 |
| -3.25333  | 1.33333  | -385  | 80  | 88  | 33 | 6509 | 223 | -43 |
| -3.25333  | 1.33333  | -390  | 77  | 82  | 32 | 6226 | 212 | -37 |
| -3.28667  | 1.31667  | -425  | 70  | 89  | 34 | 6279 | 212 | -47 |
| -3.28667  | 0.51667  | -450  | 86  | 91  | 32 | 6713 | 238 | -38 |
| -3.70333  | 0.91667  | -318  | 72  | 81  | 32 | 6271 | 207 | -42 |
| -3.70333  | 1.56667  | -515  | 66  | 73  | 28 | 6685 | 205 | -51 |
| -4.12     | 0.31667  | -575  | 74  | 73  | 28 | 6734 | 213 | -44 |
| -6.83667  | 0.98333  | -440  |     |     |    |      |     |     |
| -7.18667  | 0.7      | -500  | 75  | 81  | 33 | 5928 | 208 | -34 |
| -0.43667  | 1.96667  | -325  | 100 | 83  | 34 | 5818 | 233 | -8  |
| -0.62     | 0.9      | -500  | 77  | 85  | 34 | 5898 | 213 | -32 |
| -0.57     | 2        | -620  | 86  | 83  | 32 | 6231 | 224 | -29 |
| -1.63667  | 1.98333  | -610  | 85  | 85  | 33 | 6220 | 223 | -32 |
| -1.57     | 2.28333  | -360  | 85  | 85  | 33 | 6220 | 223 | -32 |
| -1.57     | 2.28333  | -400  | 89  | 78  | 32 | 6092 | 222 | -21 |
| -1.45333  | 1.21667  | -365  | 88  | 83  | 32 | 6330 | 229 | -29 |
| -1.53667  | 3.45     | 0     | 75  | 85  | 32 | 6401 | 217 | -44 |
| -3.05333  | 3.25     | -405  | 87  | 87  | 33 | 6379 | 229 | -33 |
| -2.62     | 2.98333  | -690  | 71  | 84  | 32 | 6383 | 213 | -46 |
| -3.12     | 3.25     | -510  | 81  | 89  | 32 | 6648 | 230 | -41 |
| -4.17     | 1.78333  | -580  | 73  | 86  | 32 | 6437 | 213 | -50 |
| -4.20333  | 3.73333  | -350  | 69  | 82  | 30 | 6920 | 214 | -58 |
| -5.97     | 2.03333  | -660  | 68  | 90  | 31 | 7023 | 219 | -66 |
| -6.85333  | 2.63333  | -598  | 109 | 104 | 33 | 7187 | 270 | -40 |
| -5.83667  | 5.51667  | 15    | 38  | 86  | 31 | 6774 | 186 | -90 |
| -9.08667  | 3.9      | -1110 | 58  | 78  | 29 | 6671 | 200 | -61 |
| -6.23667  | 1.61667  | -1010 | 59  | 90  | 32 | 6866 | 209 | -71 |
| -7.87     | 2.8      | -650  | 45  | 86  | 29 | 7138 | 194 | -97 |
| -14.52    | 2.23333  | -480  | 85  | 92  | 28 | 8037 | 246 | -77 |
| -14.25333 | 1.66667  | -620  | 49  | 77  | 29 | 6572 | 184 | -75 |
| -10.45333 | 1.4      | -310  | 80  | 89  | 31 | 6920 | 228 | -53 |
| -10.58667 | 1        | -925  | 76  | 82  | 26 | 8206 | 237 | -77 |
| -13.22    | -0.18333 | -715  | 80  | 94  | 29 | 7835 | 243 | -75 |
| -15.17194 | 2.75047  | -140  | 84  | 96  | 31 | 7415 | 243 | -62 |
| -11.9077  | 2.58122  | -380  | 80  | 99  | 31 | 7470 | 242 | -69 |
| -12.20827 | 2.81614  | -178  | 81  | 90  | 28 | 7866 | 240 | -74 |
| -16.01179 | 2.75078  | -302  | 82  | 92  | 30 | 7270 | 241 | -56 |
| -10.98667 | 3.16667  | -168  | 90  | 96  | 31 | 7388 | 250 | -55 |
| -11.62    | 2.76667  | -335  | 56  | 94  | 31 | 7179 | 207 | -91 |
| -13.68667 | 2.9      | -335  | 67  | 89  | 28 | 7900 | 227 | -89 |
| -15.45333 | 2.36667  | -560  | 71  | 83  | 30 | 6544 | 216 | -54 |
| -7.52     | 5.65     | -835  | 85  | 79  | 29 | 6602 | 231 | -35 |
| -7.93667  | 5.9      | -835  | 94  | 96  | 31 | 7290 | 253 | -51 |
| -9.22     | 5.35     | -1060 | 49  | 90  | 30 | 7061 | 198 | -93 |
| -13.12    | 3.01667  | -390  | 67  | 92  | 30 | 7542 | 220 | -85 |
| -17.81958 | 3.60031  | -535  | 105 | 100 | 31 | 7808 | 269 | -49 |
| -15.88667 | 4.96667  | -535  | 68  | 89  | 31 | 6982 | 215 | -68 |
| -16.75333 | 6.28333  | -440  | 80  | 105 | 32 | 7818 | 240 | -88 |
| -18.62    | 5.06667  | -135  | 75  | 98  | 30 | 8117 | 238 | -85 |

|           |          |       |     |     |    |      |     |     |
|-----------|----------|-------|-----|-----|----|------|-----|-----|
| -20.08667 | 5.23333  | -980  | 83  | 96  | 31 | 7516 | 244 | -64 |
| -17.88667 | 8.73333  | -960  | 66  | 86  | 27 | 8144 | 224 | -94 |
| 3.85      | 6.66333  | -1010 | 98  | 97  | 39 | 5254 | 239 | -6  |
| 4.35      | 7.23     | -250  | 103 | 105 | 38 | 5766 | 260 | -11 |
| 2.76667   | 1.09667  | 122   | 106 | 81  | 38 | 4712 | 223 | 15  |
| -1.35     | 3.29667  | -710  | 92  | 98  | 39 | 5595 | 231 | -20 |
| -3.6      | 1.79667  | -660  | 92  | 80  | 32 | 6161 | 228 | -21 |
| -3.58333  | 4.56333  | -160  | 81  | 94  | 34 | 6131 | 229 | -40 |
| -9.33333  | -5.65333 | -130  | 83  | 47  | 22 | 5893 | 193 | -14 |
| -7.98333  | -5.43667 | 170   | 79  | 60  | 27 | 5758 | 195 | -22 |
| -9.08333  | -5.70333 | 140   | 78  | 51  | 24 | 5831 | 191 | -18 |
| -7.2      | -3.75333 | 165   | 87  | 79  | 33 | 5948 | 217 | -19 |
| -7.9      | -2.77    | 165   | 84  | 80  | 33 | 6004 | 215 | -25 |
| -20.73333 | 0.01333  | -216  | 78  | 82  | 33 | 6107 | 211 | -34 |
| -8.91667  | -3.75333 | -115  | 83  | 84  | 32 | 6449 | 228 | -32 |
| -9.23333  | -2.18667 | 115   | 68  | 74  | 30 | 6245 | 200 | -42 |
| -11.56667 | -3.52    | 40    | 85  | 77  | 29 | 6707 | 227 | -33 |
| -6.66667  | -1.25333 | -190  | 83  | 76  | 31 | 6111 | 216 | -26 |
| -6.46667  | -0.97    | -310  | 93  | 80  | 32 | 6183 | 229 | -19 |
| -7.51667  | -0.80333 | 140   | 95  | 87  | 32 | 6462 | 239 | -25 |
| -7.51667  | -0.80333 | -8    | 95  | 87  | 32 | 6462 | 239 | -25 |
| -8.03333  | -0.83667 | -235  | 82  | 87  | 32 | 6476 | 224 | -40 |
| -8.06667  | -0.85333 | -275  | 80  | 88  | 33 | 6509 | 223 | -43 |
| -8.48333  | -1.25333 | -168  | 70  | 89  | 34 | 6279 | 212 | -47 |
| -8.48333  | -0.60333 | -365  | 86  | 91  | 32 | 6713 | 238 | -38 |
| -8.9      | -1.85333 | -425  | 72  | 81  | 32 | 6271 | 207 | -42 |
| -11.61667 | -1.18667 | -290  | 66  | 73  | 28 | 6685 | 205 | -51 |
| -11.96667 | -1.47    | -350  | 74  | 73  | 28 | 6734 | 213 | -44 |
| -5.21667  | -0.20333 | -175  | 75  | 81  | 33 | 5928 | 208 | -34 |
| -5.4      | -1.27    | -350  | 100 | 83  | 34 | 5818 | 233 | -8  |
| -5.35     | -0.17    | -470  | 77  | 85  | 34 | 5898 | 213 | -32 |
| -6.41667  | -0.18667 | -460  | 86  | 83  | 32 | 6231 | 224 | -29 |
| -6.35     | 0.11333  | -250  | 85  | 85  | 33 | 6220 | 223 | -32 |
| -6.23333  | -0.95333 | -215  | 89  | 78  | 32 | 6092 | 222 | -21 |
| -6.31667  | 1.28     | 150   | 88  | 83  | 32 | 6330 | 229 | -29 |
| -7.4      | 0.81333  | -540  | 87  | 87  | 33 | 6379 | 229 | -33 |
| -7.9      | 1.08     | -360  | 71  | 84  | 32 | 6383 | 213 | -46 |
| -8.95     | -0.38667 | -430  | 81  | 89  | 32 | 6648 | 230 | -41 |
| -8.98333  | 1.56333  | -200  | 73  | 86  | 32 | 6437 | 213 | -50 |
| -10.75    | -0.13667 | -510  | 69  | 82  | 30 | 6920 | 214 | -58 |
| -11.63333 | 0.46333  | -448  | 68  | 90  | 31 | 7023 | 219 | -66 |
| -10.61667 | 3.34667  | 165   | 109 | 104 | 33 | 7187 | 270 | -40 |
| -11.01667 | -0.55333 | -860  | 58  | 78  | 29 | 6671 | 200 | -61 |
| -12.65    | 0.63     | -500  | 59  | 90  | 32 | 6866 | 209 | -71 |
| -20.06667 | -0.03667 | -660  | 66  | 88  | 27 | 7925 | 225 | -91 |
| -19.95194 | 0.58047  | 10    | 80  | 94  | 29 | 7835 | 243 | -75 |
| -15.76667 | 0.99667  | -152  | 82  | 92  | 30 | 7270 | 241 | -56 |
| -16.4     | 0.59667  | -18   | 90  | 96  | 31 | 7388 | 250 | -55 |
| -18.46667 | 0.73     | -185  | 56  | 94  | 31 | 7179 | 207 | -91 |
| -20.66667 | 2.79667  | -385  | 105 | 100 | 31 | 7808 | 269 | -49 |



|          |          |       |     |     |    |      |     |     |
|----------|----------|-------|-----|-----|----|------|-----|-----|
| 25.17    | 7.35333  | -1000 | 98  | 97  | 39 | 5254 | 239 | -6  |
| 24.08667 | 1.78667  | 132   | 113 | 101 | 39 | 5587 | 251 | -4  |
| 20.32    | 0.88667  | -320  | 102 | 85  | 36 | 5538 | 234 | -2  |
| 19.97    | 3.98667  | -700  | 92  | 98  | 39 | 5595 | 231 | -20 |
| 17.72    | 2.48667  | -650  | 92  | 80  | 32 | 6161 | 228 | -21 |
| 11.98667 | -4.96333 | -120  | 83  | 47  | 22 | 5893 | 193 | -14 |
| 13.33667 | -4.74667 | 180   | 79  | 60  | 27 | 5758 | 195 | -22 |
| 12.23667 | -5.01333 | 150   | 78  | 51  | 24 | 5831 | 191 | -18 |
| 14.48667 | -2.96333 | 160   | 88  | 78  | 33 | 5866 | 216 | -18 |
| 14.12    | -3.06333 | 175   | 87  | 79  | 33 | 5948 | 217 | -19 |
| 13.42    | -2.08    | 175   | 84  | 80  | 33 | 6004 | 215 | -25 |
| 13.38667 | -3.13    | -850  | 84  | 82  | 33 | 6107 | 219 | -27 |
| 13.08667 | -1.33    | -160  | 78  | 82  | 33 | 6107 | 211 | -34 |
| 0.58667  | 0.70333  | -206  | 83  | 84  | 32 | 6449 | 228 | -32 |
| 12.40333 | -3.06333 | -105  | 68  | 74  | 30 | 6245 | 200 | -42 |
| 12.08667 | -1.49667 | 125   | 83  | 76  | 31 | 6111 | 216 | -26 |
| 14.65333 | -0.56333 | -180  | 93  | 80  | 32 | 6183 | 229 | -19 |
| 14.85333 | -0.28    | -300  | 95  | 87  | 32 | 6462 | 239 | -25 |
| 13.80333 | -0.11333 | 150   | 95  | 87  | 32 | 6462 | 239 | -25 |
| 13.80333 | -0.11333 | 2     | 82  | 87  | 32 | 6476 | 224 | -40 |
| 13.28667 | -0.14667 | -225  | 80  | 88  | 33 | 6509 | 223 | -43 |
| 13.25333 | -0.16333 | -265  | 70  | 89  | 34 | 6279 | 212 | -47 |
| 12.83667 | -0.56333 | -158  | 86  | 91  | 32 | 6713 | 238 | -38 |
| 12.83667 | 0.08667  | -355  | 72  | 81  | 32 | 6271 | 207 | -42 |
| 12.42    | -1.16333 | -415  | 66  | 73  | 28 | 6685 | 205 | -51 |
| 9.70333  | -0.49667 | -280  | 74  | 73  | 28 | 6734 | 213 | -44 |
| 9.35333  | -0.78    | -340  | 75  | 81  | 33 | 5928 | 208 | -34 |
| 16.10333 | 0.48667  | -165  | 100 | 83  | 34 | 5818 | 233 | -8  |
| 15.92    | -0.58    | -340  | 77  | 85  | 34 | 5898 | 213 | -32 |
| 15.97    | 0.52     | -460  | 86  | 83  | 32 | 6231 | 224 | -29 |
| 14.90333 | 0.50333  | -450  | 85  | 85  | 33 | 6220 | 223 | -32 |
| 14.97    | 0.80333  | -240  | 89  | 78  | 32 | 6092 | 222 | -21 |
| 15.08667 | -0.26333 | -205  | 88  | 83  | 32 | 6330 | 229 | -29 |
| 15.00333 | 1.97     | 160   | 87  | 87  | 33 | 6379 | 229 | -33 |
| 13.92    | 1.50333  | -530  | 71  | 84  | 32 | 6383 | 213 | -46 |
| 13.42    | 1.77     | -350  | 73  | 86  | 32 | 6437 | 213 | -50 |
| 12.33667 | 2.25333  | -190  | 69  | 82  | 30 | 6920 | 214 | -58 |
| 10.57    | 0.55333  | -500  | 68  | 90  | 31 | 7023 | 219 | -66 |
| 9.68667  | 1.15333  | -438  | 109 | 104 | 33 | 7187 | 270 | -40 |
| 10.70333 | 4.03667  | 175   | 58  | 78  | 29 | 6671 | 200 | -61 |
| 10.30333 | 0.13667  | -850  | 59  | 90  | 32 | 6866 | 209 | -71 |
| 8.67     | 1.32     | -490  | 45  | 86  | 29 | 7138 | 194 | -97 |
| 2.02     | 0.75333  | -320  | 80  | 94  | 29 | 7835 | 243 | -75 |
| 1.36806  | 1.27047  | 20    | 84  | 96  | 31 | 7415 | 243 | -62 |
| 4.6323   | 1.10122  | -142  | 82  | 92  | 30 | 7270 | 241 | -56 |
| 5.55333  | 1.68667  | -8    | 90  | 96  | 31 | 7388 | 250 | -55 |
| 4.92     | 1.28667  | -175  | 56  | 94  | 31 | 7179 | 207 | -91 |
| 2.85333  | 1.42     | -175  | 67  | 89  | 28 | 7900 | 227 | -89 |
| 1.08667  | 0.88667  | -400  | 66  | 86  | 27 | 8144 | 224 | -94 |
| 11.14667 | 12.85    | 0     | 80  | 97  | 39 | 5437 | 218 | -29 |

|           |          |      |     |     |    |      |     |     |
|-----------|----------|------|-----|-----|----|------|-----|-----|
| 11.19667  | 14.3     | -375 | 103 | 101 | 38 | 5709 | 251 | -11 |
| 8.56333   | 9.83333  | -90  | 94  | 86  | 34 | 5925 | 226 | -20 |
| 3.14667   | 3.26667  | 110  | 78  | 51  | 24 | 5831 | 191 | -18 |
| -0.77     | 2.36667  | 0    | 77  | 60  | 25 | 6240 | 205 | -26 |
| 5.03      | 5.21667  | 135  | 87  | 79  | 33 | 5948 | 217 | -19 |
| 4.33      | 6.2      | 135  | 84  | 80  | 33 | 6004 | 215 | -25 |
| 4.29667   | 5.15     | -890 | 84  | 82  | 33 | 6107 | 219 | -27 |
| 4.13      | 6.65     | 117  | 83  | 81  | 33 | 6056 | 215 | -28 |
| -8.50333  | 8.98333  | -246 | 78  | 82  | 33 | 6107 | 211 | -34 |
| 3.31333   | 5.21667  | -145 | 83  | 84  | 32 | 6449 | 228 | -32 |
| 2.99667   | 6.78333  | 85   | 68  | 74  | 30 | 6245 | 200 | -42 |
| 6.38      | 7.68333  | -375 | 95  | 81  | 33 | 5870 | 226 | -13 |
| 5.56333   | 7.71667  | -220 | 83  | 76  | 31 | 6111 | 216 | -26 |
| 5.76333   | 8        | -340 | 93  | 80  | 32 | 6183 | 229 | -19 |
| 4.71333   | 8.16667  | 110  | 95  | 87  | 32 | 6462 | 239 | -25 |
| 4.71333   | 8.16667  | -38  | 95  | 87  | 32 | 6462 | 239 | -25 |
| 4.19667   | 8.13333  | -270 | 82  | 87  | 32 | 6476 | 224 | -40 |
| 3.74667   | 8.36667  | -395 | 86  | 91  | 32 | 6713 | 238 | -38 |
| 3.33      | 7.11667  | -455 | 72  | 81  | 32 | 6271 | 207 | -42 |
| 7.01333   | 8.76667  | -205 | 75  | 81  | 33 | 5928 | 208 | -34 |
| 6.83      | 7.7      | -380 | 100 | 83  | 34 | 5818 | 233 | -8  |
| 5.81333   | 8.78333  | -490 | 86  | 83  | 32 | 6231 | 224 | -29 |
| 5.88      | 9.08333  | -280 | 85  | 85  | 33 | 6220 | 223 | -32 |
| 5.99667   | 8.01667  | -245 | 89  | 78  | 32 | 6092 | 222 | -21 |
| 5.91333   | 10.25    | 120  | 88  | 83  | 32 | 6330 | 229 | -29 |
| 4.33      | 10.05    | -390 | 71  | 84  | 32 | 6383 | 213 | -46 |
| 0.59667   | 9.43333  | -478 | 68  | 90  | 31 | 7023 | 219 | -66 |
| -3.53667  | 9.96667  | -182 | 82  | 92  | 30 | 7270 | 241 | -56 |
| -4.17     | 9.56667  | -48  | 90  | 96  | 31 | 7388 | 250 | -55 |
| -8.00333  | 9.16667  | -440 | 67  | 89  | 28 | 7900 | 227 | -89 |
| -0.48667  | 12.7     | -715 | 85  | 79  | 29 | 6602 | 231 | -35 |
| -1.77     | 12.15    | -940 | 94  | 96  | 31 | 7290 | 253 | -51 |
| -10.36958 | 10.40031 | -270 | 67  | 92  | 30 | 7542 | 220 | -85 |
| -11.17    | 11.86667 | -15  | 80  | 105 | 32 | 7818 | 240 | -88 |
| 21.38667  | 1.97     | 480  | 80  | 97  | 39 | 5437 | 218 | -29 |
| 18.80333  | -1.04667 | 390  | 94  | 86  | 34 | 5925 | 226 | -20 |
| 17.60333  | -0.01333 | 360  | 98  | 95  | 35 | 6290 | 246 | -22 |
| 13.38667  | -7.61333 | 590  | 78  | 51  | 24 | 5831 | 191 | -18 |
| 9.47      | -8.51333 | 480  | 77  | 60  | 25 | 6240 | 205 | -26 |
| 15.27     | -5.66333 | 615  | 87  | 79  | 33 | 5948 | 217 | -19 |
| 1.73667   | -1.89667 | 234  | 78  | 82  | 33 | 6107 | 211 | -34 |
| 13.23667  | -4.09667 | 565  | 68  | 74  | 30 | 6245 | 200 | -42 |
| 16.62     | -3.19667 | 105  | 95  | 81  | 33 | 5870 | 226 | -13 |
| 15.80333  | -3.16333 | 260  | 83  | 76  | 31 | 6111 | 216 | -26 |
| 14.95333  | -2.71333 | 590  | 95  | 87  | 32 | 6462 | 239 | -25 |
| 14.43667  | -2.74667 | 210  | 82  | 87  | 32 | 6476 | 224 | -40 |
| 13.98667  | -2.51333 | 85   | 86  | 91  | 32 | 6713 | 238 | -38 |
| 13.57     | -3.76333 | 25   | 72  | 81  | 32 | 6271 | 207 | -42 |
| 17.25333  | -2.11333 | 275  | 75  | 81  | 33 | 5928 | 208 | -34 |
| 16.12     | -1.79667 | 200  | 85  | 85  | 33 | 6220 | 223 | -32 |

|           |          |       |     |     |    |      |     |      |
|-----------|----------|-------|-----|-----|----|------|-----|------|
| 16.23667  | -2.86333 | 235   | 89  | 78  | 32 | 6092 | 222 | -21  |
| 16.15333  | -0.63    | 600   | 88  | 83  | 32 | 6330 | 229 | -29  |
| 14.57     | -0.83    | 90    | 71  | 84  | 32 | 6383 | 213 | -46  |
| 10.83667  | -1.44667 | 2     | 68  | 90  | 31 | 7023 | 219 | -66  |
| 6.70333   | -0.91333 | 298   | 82  | 92  | 30 | 7270 | 241 | -56  |
| 6.07      | -1.31333 | 432   | 90  | 96  | 31 | 7388 | 250 | -55  |
| 2.23667   | -1.71333 | 40    | 67  | 89  | 28 | 7900 | 227 | -89  |
| 9.75333   | 1.82     | -235  | 85  | 79  | 29 | 6602 | 231 | -35  |
| -0.12958  | -0.47969 | 210   | 67  | 92  | 30 | 7542 | 220 | -85  |
| -0.93     | 0.98667  | 465   | 80  | 105 | 32 | 7818 | 240 | -88  |
| 9.73      | 5.88333  | -165  | 102 | 89  | 38 | 5219 | 232 | 0    |
| 9.51333   | 4.76667  | -40   | 106 | 84  | 38 | 4938 | 227 | 8    |
| 7.18      | 5.05     | -100  | 98  | 97  | 39 | 5254 | 239 | -6   |
| 7.69667   | 10.15    | -810  | 111 | 102 | 38 | 5738 | 259 | -5   |
| 4.44667   | 7.5      | -560  | 89  | 85  | 32 | 6289 | 232 | -28  |
| 7.96333   | 11.38333 | -630  | 127 | 88  | 35 | 5693 | 265 | 14   |
| 4.16333   | 4.21667  | -383  | 81  | 72  | 31 | 5725 | 208 | -18  |
| 5.86333   | 3.46667  | -70   | 100 | 82  | 35 | 5636 | 226 | -8   |
| 3.54667   | 2.36667  | -5    | 95  | 76  | 33 | 5585 | 220 | -7   |
| 4.48      | 2.01667  | 7     | 90  | 74  | 33 | 5398 | 210 | -10  |
| -13.45333 | 12.73333 | -1260 | 111 | 100 | 33 | 7205 | 274 | -28  |
| 13.53     | -3.1     | 30    | 59  | 70  | 36 | 4370 | 165 | -29  |
| 12.28     | 2.58333  | -100  | 92  | 74  | 36 | 4613 | 205 | 1    |
| 13.01333  | -0.31667 | -670  | 77  | 71  | 36 | 4596 | 185 | -11  |
| 0.69667   | -0.61667 | -420  | 79  | 60  | 27 | 5758 | 195 | -22  |
| -1.37     | -1.1     | -540  | 81  | 51  | 22 | 6041 | 193 | -31  |
| -2.92     | -1.26667 | -275  | 79  | 60  | 26 | 6128 | 201 | -26  |
| -4.22     | -1.81667 | -1000 | 76  | 61  | 26 | 6224 | 205 | -28  |
| -1.37     | -4.06667 | -715  | 69  | 60  | 24 | 6598 | 197 | -45  |
| -0.38667  | 0.65     | -240  | 85  | 78  | 30 | 6353 | 224 | -28  |
| 1.49667   | 2.78333  | -321  | 78  | 71  | 30 | 5869 | 205 | -28  |
| 0.59667   | 3.95     | -487  | 77  | 88  | 33 | 6508 | 221 | -45  |
| -2.13667  | 2.25     | -560  | 86  | 80  | 30 | 6640 | 229 | -30  |
| 0.83      | 5.83333  | -30   | 75  | 85  | 32 | 6398 | 217 | -43  |
| -0.22     | 4.45     | -860  | 81  | 89  | 32 | 6660 | 229 | -41  |
| 2.83      | 7.13333  | -950  | 91  | 84  | 32 | 6284 | 235 | -21  |
| -3.82     | 6.58333  | -530  | 24  | 86  | 32 | 6495 | 166 | -102 |
| -4.57     | 6.76667  | -1110 | 40  | 90  | 31 | 6896 | 190 | -93  |
| -3.22     | 8.28333  | -490  | 123 | 91  | 32 | 6600 | 273 | -3   |
| -7.88667  | -0.03333 | -280  | 59  | 65  | 24 | 7088 | 199 | -63  |
| -8.88667  | 4.46667  | -210  | 72  | 89  | 28 | 7585 | 229 | -78  |
| -2.47     | 4.9      | -410  | 78  | 82  | 33 | 6107 | 211 | -34  |
| 0.44667   | 2.8      | -320  | 56  | 81  | 30 | 6801 | 200 | -69  |
| -4.95333  | 3.5      | -5    | 44  | 68  | 27 | 6556 | 173 | -76  |
| -7.77     | 5.25     | -720  | 68  | 90  | 30 | 7144 | 221 | -70  |
| -2.97     | 3.73333  | -440  | 51  | 68  | 27 | 6544 | 183 | -64  |
| -3.72     | 5.45     | -350  | 46  | 86  | 31 | 6728 | 190 | -82  |
| -8.07     | 8.08333  | -1060 | 95  | 89  | 29 | 7628 | 252 | -50  |
| -4.10333  | 8.66667  | -960  | 68  | 75  | 29 | 6470 | 210 | -48  |
| -15.10333 | 4.35     | -410  | 70  | 83  | 26 | 8207 | 232 | -79  |

|           |          |       |     |     |    |      |     |      |
|-----------|----------|-------|-----|-----|----|------|-----|------|
| -12.53667 | 5.05     | -500  | 59  | 81  | 27 | 7595 | 209 | -87  |
| -3.72     | 4.3      | -720  | 75  | 86  | 30 | 7023 | 226 | -53  |
| -7.88667  | -0.03333 | -1210 | 59  | 65  | 24 | 7088 | 199 | -63  |
| -7.03667  | 5.15     | -760  | 76  | 89  | 30 | 7130 | 228 | -60  |
| -1.48667  | 0.56667  | -735  | 85  | 67  | 27 | 6307 | 213 | -27  |
| 5.93667   | 6.93     | -540  | 89  | 85  | 32 | 6289 | 232 | -28  |
| 9.45333   | 10.81333 | -610  | 127 | 88  | 35 | 5693 | 265 | 14   |
| 7.35333   | 2.89667  | -50   | 100 | 82  | 35 | 5636 | 226 | -8   |
| 5.03667   | 1.79667  | 15    | 95  | 76  | 33 | 5585 | 220 | -7   |
| 15.02     | -3.67    | 50    | 59  | 70  | 36 | 4370 | 165 | -29  |
| 2.18667   | -1.18667 | -400  | 79  | 60  | 27 | 5758 | 195 | -22  |
| -1.43     | -1.83667 | -255  | 79  | 60  | 26 | 6128 | 201 | -26  |
| 1.10333   | 0.08     | -220  | 85  | 78  | 30 | 6353 | 224 | -28  |
| 2.32      | 5.26333  | -10   | 75  | 85  | 32 | 6398 | 217 | -43  |
| -2.33     | 6.01333  | -510  | 24  | 86  | 32 | 6495 | 166 | -102 |
| -3.46333  | 2.93     | 15    | 75  | 86  | 30 | 7023 | 226 | -53  |
| -2.23     | 4.88     | -330  | 44  | 68  | 27 | 6556 | 173 | -76  |
| -2.61333  | 8.09667  | -940  | 46  | 86  | 31 | 6728 | 190 | -82  |
| -11.04667 | 4.48     | -480  | 68  | 75  | 29 | 6470 | 210 | -48  |
| -2.23     | 3.73     | -700  | 59  | 81  | 27 | 7595 | 209 | -87  |
| -6.39667  | -0.60333 | -1190 | 59  | 65  | 24 | 7088 | 199 | -63  |
| 0.00333   | -0.00333 | -715  | 85  | 67  | 27 | 6307 | 213 | -27  |
| 7         | 1.10333  | 205   | 102 | 89  | 38 | 5219 | 232 | 0    |
| 6.78333   | -0.01333 | 330   | 106 | 84  | 38 | 4938 | 227 | 8    |
| 4.45      | 0.27     | 270   | 98  | 97  | 39 | 5254 | 239 | -6   |
| 4.96667   | 5.37     | -440  | 111 | 102 | 38 | 5738 | 259 | -5   |
| 9.7       | 1.15333  | 230   | 110 | 72  | 38 | 4331 | 212 | 24   |
| 1.71667   | 2.72     | -190  | 89  | 85  | 32 | 6289 | 232 | -28  |
| 8.7       | -1.39667 | -260  | 101 | 76  | 36 | 4756 | 217 | 7    |
| 10.28333  | -5.09667 | -300  | 77  | 71  | 36 | 4596 | 185 | -11  |
| -5.65     | -6.04667 | 95    | 79  | 60  | 26 | 6128 | 201 | -26  |
| -4.1      | -8.84667 | -345  | 69  | 60  | 24 | 6598 | 197 | -45  |
| -3.11667  | -4.13    | 130   | 85  | 78  | 30 | 6353 | 224 | -28  |
| -4.86667  | -2.53    | -190  | 86  | 80  | 30 | 6640 | 229 | -30  |
| -1.9      | 1.05333  | 340   | 75  | 85  | 32 | 6398 | 217 | -43  |
| -7.3      | 1.98667  | -740  | 40  | 90  | 31 | 6896 | 190 | -93  |
| -5.95     | 3.50333  | -120  | 123 | 91  | 32 | 6600 | 273 | -3   |
| -10.61667 | -4.81333 | 90    | 59  | 65  | 24 | 7088 | 199 | -63  |
| -15.26667 | 0.27     | 275   | 59  | 81  | 27 | 7595 | 209 | -87  |
| -10.5     | 0.47     | -350  | 68  | 90  | 30 | 7144 | 221 | -70  |
| -6.45     | 0.67     | 20    | 46  | 86  | 31 | 6728 | 190 | -82  |
| -12.86667 | -0.39667 | 10    | 80  | 92  | 28 | 7893 | 239 | -79  |
| 14.48     | -2.63667 | 340   | 102 | 89  | 38 | 5219 | 232 | 0    |
| 14.26333  | -3.75333 | 465   | 106 | 84  | 38 | 4938 | 227 | 8    |
| 17.18     | -2.58667 | 365   | 110 | 72  | 38 | 4331 | 212 | 24   |
| 9.19667   | -1.02    | -55   | 89  | 85  | 32 | 6289 | 232 | -28  |
| 12.71333  | 2.86333  | -125  | 127 | 88  | 35 | 5693 | 265 | 14   |
| 8.91333   | -4.30333 | 122   | 81  | 72  | 31 | 5725 | 208 | -18  |
| 10.61333  | -5.05333 | 435   | 100 | 82  | 35 | 5636 | 226 | -8   |
| 8.29667   | -6.15333 | 500   | 95  | 76  | 33 | 5585 | 220 | -7   |

|           |          |      |     |     |    |      |     |      |
|-----------|----------|------|-----|-----|----|------|-----|------|
| 9.23      | -6.50333 | 512  | 90  | 74  | 33 | 5398 | 210 | -10  |
| 18.28     | -11.62   | 535  | 59  | 70  | 36 | 4370 | 165 | -29  |
| 5.44667   | -9.13667 | 85   | 79  | 60  | 27 | 5758 | 195 | -22  |
| 1.83      | -9.78667 | 230  | 79  | 60  | 26 | 6128 | 201 | -26  |
| 6.24667   | -5.73667 | 184  | 78  | 71  | 30 | 5869 | 205 | -28  |
| 5.58      | -2.68667 | 475  | 75  | 85  | 32 | 6398 | 217 | -43  |
| 4.53      | -4.07    | -355 | 81  | 89  | 32 | 6660 | 229 | -41  |
| 7.58      | -1.38667 | -445 | 91  | 84  | 32 | 6284 | 235 | -21  |
| 0.93      | -1.93667 | -25  | 24  | 86  | 32 | 6495 | 166 | -102 |
| 0.18      | -1.75333 | -605 | 40  | 90  | 31 | 6896 | 190 | -93  |
| 1.53      | -0.23667 | 15   | 123 | 91  | 32 | 6600 | 273 | -3   |
| -3.13667  | -8.55333 | 225  | 59  | 65  | 24 | 7088 | 199 | -63  |
| -4.13667  | -4.05333 | 295  | 72  | 89  | 28 | 7585 | 229 | -78  |
| 5.19667   | -5.72    | 185  | 78  | 82  | 33 | 6107 | 211 | -34  |
| -7.78667  | -3.47    | 410  | 59  | 81  | 27 | 7595 | 209 | -87  |
| 2.28      | -3.62    | 95   | 56  | 81  | 30 | 6801 | 200 | -69  |
| -0.20333  | -5.02    | 500  | 44  | 68  | 27 | 6556 | 173 | -76  |
| -3.02     | -3.27    | -215 | 68  | 90  | 30 | 7144 | 221 | -70  |
| 1.03      | -3.07    | 155  | 46  | 86  | 31 | 6728 | 190 | -82  |
| 0.64667   | 0.14667  | -455 | 68  | 75  | 29 | 6470 | 210 | -48  |
| 1.13      | -0.22    | -330 | 71  | 83  | 30 | 6544 | 216 | -54  |
| 0.68      | 0.04667  | 232  | 85  | 79  | 29 | 6609 | 231 | -35  |
| -7.78667  | -3.47    | -905 | 59  | 81  | 27 | 7595 | 209 | -87  |
| 1.03      | -4.22    | -215 | 75  | 86  | 30 | 7023 | 226 | -53  |
| -5.38667  | -4.13667 | 145  | 80  | 92  | 28 | 7893 | 239 | -79  |
| -3.13667  | -8.55333 | -705 | 59  | 65  | 24 | 7088 | 199 | -63  |
| -4.30333  | -3.88667 | -355 | 71  | 91  | 29 | 7531 | 227 | -79  |
| 1.19991   | 4.00028  | -645 | 84  | 71  | 29 | 6185 | 223 | -21  |
| -3.37927  | -2.6427  | 320  | 90  | 99  | 31 | 7518 | 253 | -59  |
| 6.90333   | -1.46333 | 260  | 106 | 84  | 38 | 4938 | 227 | 8    |
| 5.08667   | 3.92     | -510 | 111 | 102 | 38 | 5738 | 259 | -5   |
| 1.83667   | 1.27     | -260 | 89  | 85  | 32 | 6289 | 232 | -28  |
| 3.25333   | -2.76333 | 230  | 100 | 82  | 35 | 5636 | 226 | -8   |
| 0.93667   | -3.86333 | 295  | 95  | 76  | 33 | 5585 | 220 | -7   |
| -16.06333 | 6.50333  | -960 | 111 | 100 | 33 | 7205 | 274 | -28  |
| 10.92     | -9.33    | 330  | 59  | 70  | 36 | 4370 | 165 | -29  |
| -1.91333  | -6.84667 | -120 | 79  | 60  | 27 | 5758 | 195 | -22  |
| -5.53     | -7.49667 | 25   | 79  | 60  | 26 | 6128 | 201 | -26  |
| -2.99667  | -5.58    | 60   | 85  | 78  | 30 | 6353 | 224 | -28  |
| -1.78     | -0.39667 | 270  | 75  | 85  | 32 | 6398 | 217 | -43  |
| 0.22      | 0.90333  | -650 | 91  | 84  | 32 | 6284 | 235 | -21  |
| -6.43     | 0.35333  | -230 | 24  | 86  | 32 | 6495 | 166 | -102 |
| -7.56333  | -2.73    | 295  | 44  | 68  | 27 | 6556 | 173 | -76  |
| -6.33     | -0.78    | -50  | 46  | 86  | 31 | 6728 | 190 | -82  |
| -10.68    | 1.85333  | -760 | 95  | 89  | 29 | 7628 | 252 | -50  |
| -6.71333  | 2.43667  | -660 | 68  | 75  | 29 | 6470 | 210 | -48  |
| -15.14667 | -1.18    | -200 | 59  | 81  | 27 | 7595 | 209 | -87  |
| -6.33     | -1.93    | -420 | 75  | 86  | 30 | 7023 | 226 | -53  |
| -10.49667 | -6.26333 | -910 | 59  | 65  | 24 | 7088 | 199 | -63  |
| 14.47     | 3.65333  | -60  | 110 | 72  | 38 | 4331 | 212 | 24   |

|           |          |      |     |     |    |      |     |     |
|-----------|----------|------|-----|-----|----|------|-----|-----|
| 6.48667   | 5.22     | -480 | 89  | 85  | 32 | 6289 | 232 | -28 |
| 7.90333   | 1.18667  | 10   | 100 | 82  | 35 | 5636 | 226 | -8  |
| 15.57     | -5.38    | 110  | 59  | 70  | 36 | 4370 | 165 | -29 |
| 13.47     | 1.10333  | -550 | 101 | 76  | 36 | 4756 | 217 | 7   |
| -0.88     | -3.54667 | -195 | 79  | 60  | 26 | 6128 | 201 | -26 |
| 0.67      | -6.34667 | -635 | 69  | 60  | 24 | 6598 | 197 | -45 |
| -0.09667  | -0.03    | -480 | 86  | 80  | 30 | 6640 | 229 | -30 |
| 2.87      | 3.55333  | 50   | 75  | 85  | 32 | 6398 | 217 | -43 |
| -5.84667  | -2.31333 | -200 | 59  | 65  | 24 | 7088 | 199 | -63 |
| -8.09667  | 2.10333  | -280 | 68  | 90  | 30 | 7144 | 221 | -70 |
| -5.73     | 2.97     | -640 | 46  | 86  | 31 | 6728 | 190 | -82 |
| -1.68     | 3.17     | -270 | 80  | 92  | 28 | 7893 | 239 | -79 |
| 7.92      | 1.50333  | 245  | 110 | 72  | 38 | 4331 | 212 | 24  |
| 1.35333   | -0.96333 | 315  | 80  | 97  | 38 | 5538 | 222 | -30 |
| -0.43     | 0.20333  | 25   | 113 | 101 | 39 | 5587 | 251 | -4  |
| -0.96333  | -2.06333 | 380  | 89  | 77  | 32 | 5950 | 224 | -15 |
| -0.03     | -2.41333 | 392  | 100 | 82  | 35 | 5636 | 226 | -8  |
| 7.77      | -1.84667 | 285  | 95  | 76  | 33 | 5585 | 220 | -7  |
| -7.43     | -5.69667 | 110  | 90  | 74  | 33 | 5398 | 210 | -10 |
| -5.88     | -8.49667 | -330 | 92  | 74  | 36 | 4613 | 205 | 1   |
| -3.01333  | -1.64667 | 110  | 79  | 60  | 26 | 6128 | 201 | -26 |
| -3.91333  | -0.48    | -330 | 69  | 60  | 24 | 6598 | 197 | -45 |
| -2.53     | -0.83    | 245  | 78  | 71  | 30 | 5869 | 205 | -28 |
| -3.68     | 1.40333  | 355  | 77  | 88  | 33 | 6508 | 221 | -45 |
| -12.39667 | -4.46333 | 105  | 87  | 77  | 31 | 6174 | 222 | -24 |
| -8.93     | 1.20333  | 175  | 75  | 85  | 32 | 6398 | 217 | -43 |
| -10.21333 | 0.23667  | 25   | 59  | 65  | 24 | 7088 | 199 | -63 |
| -9.01333  | -0.09667 | -375 | 77  | 79  | 31 | 6296 | 212 | -36 |
| -11.54667 | 0.72     | -375 | 59  | 81  | 27 | 7595 | 209 | -87 |
| -20.1248  | 7.00055  | 125  | 60  | 91  | 32 | 6852 | 211 | -70 |
| -8.06009  | 8.09028  | -765 | 59  | 81  | 30 | 6780 | 202 | -68 |
| -9.00273  | 11.83756 | -371 | 77  | 86  | 31 | 6877 | 226 | -50 |
| -9.76356  | -2.37712 | 343  | 59  | 81  | 27 | 7595 | 209 | -87 |
| -17.04667 | 0.62     | 343  | 76  | 89  | 30 | 7130 | 228 | -60 |
| 2.82      | 3.68667  | -238 | 138 | 67  | 29 | 5855 | 270 | 40  |
| 2.77      | 4.87     | 105  | 89  | 78  | 27 | 7487 | 239 | -47 |

| bio7 | bio8 | bio9 | bio10 | bio11 | bio12 | bio13 | bio14 | bio15 |
|------|------|------|-------|-------|-------|-------|-------|-------|
| 245  | 41   | 167  | 167   | 34    | 967   | 105   | 51    | 18    |
| 271  | 120  | 179  | 179   | 33    | 633   | 70    | 34    | 18    |
| 250  | 109  | 196  | 196   | 51    | 797   | 81    | 42    | 15    |
| 205  | 113  | 65   | 166   | 39    | 650   | 78    | 40    | 18    |
| 208  | 56   | 167  | 167   | 47    | 763   | 85    | 49    | 17    |
| 236  | 107  | 65   | 173   | 31    | 662   | 63    | 45    | 9     |
| 247  | 131  | 20   | 150   | 11    | 849   | 102   | 52    | 20    |
| 251  | 146  | 52   | 163   | 20    | 786   | 94    | 48    | 21    |
| 242  | 171  | 55   | 171   | 14    | 864   | 87    | 59    | 13    |
| 262  | 125  | 41   | 177   | 31    | 826   | 86    | 51    | 15    |
| 246  | 167  | 55   | 167   | 15    | 722   | 79    | 42    | 18    |
| 259  | 14   | 80   | 163   | 3     | 1155  | 110   | 80    | 11    |
| 268  | 26   | 58   | 178   | 16    | 976   | 94    | 68    | 11    |
| 207  | 155  | 27   | 158   | 10    | 584   | 62    | 32    | 20    |
| 217  | 90   | 29   | 152   | 8     | 791   | 88    | 42    | 22    |
| 209  | 92   | 25   | 152   | 7     | 618   | 67    | 35    | 19    |
| 236  | 151  | 22   | 158   | 0     | 713   | 75    | 38    | 23    |
| 231  | 154  | 22   | 160   | 2     | 585   | 66    | 34    | 21    |
| 234  | 156  | 27   | 156   | 2     | 696   | 75    | 44    | 17    |
| 253  | 166  | 35   | 166   | 4     | 663   | 72    | 39    | 17    |
| 246  | 163  | 27   | 163   | 1     | 569   | 67    | 27    | 25    |
| 236  | 162  | 41   | 162   | 11    | 740   | 79    | 43    | 17    |
| 240  | 160  | 39   | 160   | 7     | 749   | 79    | 47    | 16    |
| 246  | 161  | 37   | 161   | 5     | 743   | 79    | 43    | 18    |
| 243  | 160  | 39   | 160   | 5     | 753   | 83    | 50    | 17    |
| 245  | 155  | 34   | 155   | -2    | 778   | 87    | 50    | 18    |
| 260  | 166  | 35   | 166   | 0     | 653   | 73    | 38    | 19    |
| 242  | 147  | 20   | 147   | -12   | 827   | 90    | 56    | 14    |
| 260  | 171  | 6    | 171   | -1    | 568   | 66    | 31    | 23    |
| 218  | 10   | 66   | 144   | 1     | 1125  | 126   | 78    | 14    |
| 223  | 148  | 35   | 148   | 2     | 979   | 104   | 64    | 14    |
| 239  | 169  | 53   | 169   | 19    | 769   | 77    | 49    | 14    |
| 239  | 169  | 53   | 169   | 19    | 769   | 77    | 49    | 14    |
| 228  | 164  | 51   | 164   | 20    | 790   | 78    | 47    | 14    |
| 228  | 1    | 24   | 139   | -10   | 1135  | 123   | 71    | 16    |
| 238  | 10   | 36   | 154   | 0     | 936   | 94    | 61    | 12    |
| 232  | 14   | 40   | 154   | 6     | 938   | 93    | 63    | 12    |
| 232  | 14   | 40   | 154   | 6     | 938   | 93    | 63    | 12    |
| 241  | 163  | 46   | 163   | 10    | 795   | 81    | 52    | 14    |
| 242  | 146  | 41   | 160   | 4     | 821   | 81    | 54    | 11    |
| 248  | 171  | 51   | 171   | 13    | 665   | 65    | 42    | 13    |
| 245  | 138  | 32   | 153   | -6    | 891   | 88    | 58    | 12    |
| 264  | 177  | 22   | 177   | 10    | 651   | 72    | 40    | 17    |
| 264  | 177  | 22   | 177   | 10    | 651   | 72    | 40    | 17    |
| 264  | 163  | 7    | 163   | -4    | 714   | 81    | 43    | 17    |
| 264  | 163  | 7    | 163   | -4    | 714   | 81    | 43    | 17    |
| 264  | 163  | 7    | 163   | -4    | 714   | 81    | 43    | 17    |
| 266  | 161  | 5    | 161   | -6    | 743   | 83    | 45    | 16    |
| 249  | 155  | 33   | 155   | -4    | 789   | 86    | 51    | 16    |

|     |     |     |     |     |      |     |    |    |
|-----|-----|-----|-----|-----|------|-----|----|----|
| 259 | 150 | 26  | 150 | -11 | 789  | 86  | 50 | 15 |
| 276 | 171 | 11  | 171 | -2  | 647  | 75  | 39 | 18 |
| 249 | 151 | -1  | 151 | -9  | 762  | 85  | 51 | 16 |
| 256 | 151 | -12 | 151 | -20 | 687  | 85  | 40 | 25 |
| 257 | 159 | -5  | 159 | -13 | 665  | 85  | 38 | 26 |
| 242 | 9   | 33  | 150 | -1  | 879  | 91  | 55 | 13 |
| 241 | 174 | 59  | 174 | 25  | 747  | 79  | 48 | 16 |
| 245 | 11  | 35  | 152 | 1   | 851  | 87  | 53 | 13 |
| 253 | 165 | 45  | 165 | 5   | 664  | 70  | 44 | 15 |
| 255 | 163 | 43  | 163 | 4   | 738  | 77  | 49 | 14 |
| 255 | 163 | 43  | 163 | 4   | 738  | 77  | 49 | 14 |
| 243 | 165 | 47  | 165 | 10  | 720  | 71  | 46 | 13 |
| 258 | 168 | 17  | 168 | 6   | 958  | 109 | 61 | 19 |
| 261 | 156 | 3   | 156 | -8  | 910  | 111 | 54 | 26 |
| 262 | 167 | 16  | 167 | 4   | 786  | 97  | 47 | 25 |
| 266 | 166 | 8   | 166 | -5  | 753  | 97  | 43 | 30 |
| 259 | 152 | 0   | 152 | -11 | 933  | 113 | 56 | 26 |
| 271 | 166 | 7   | 166 | -5  | 676  | 79  | 42 | 18 |
| 263 | 154 | 1   | 154 | -11 | 984  | 122 | 55 | 30 |
| 272 | 155 | 22  | 155 | -23 | 686  | 85  | 39 | 26 |
| 271 | 153 | 18  | 153 | -24 | 691  | 87  | 39 | 26 |
| 285 | 156 | 21  | 156 | -25 | 898  | 106 | 55 | 22 |
| 310 | 199 | 29  | 199 | 14  | 1080 | 124 | 53 | 23 |
| 276 | 124 | -39 | 124 | -50 | 1067 | 138 | 56 | 32 |
| 261 | 142 | 9   | 142 | -29 | 739  | 91  | 43 | 24 |
| 280 | 146 | 12  | 146 | -31 | 967  | 120 | 57 | 26 |
| 291 | 135 | -43 | 135 | -48 | 935  | 134 | 45 | 38 |
| 316 | 162 | -32 | 162 | -43 | 744  | 103 | 37 | 36 |
| 323 | 181 | -11 | 181 | -27 | 686  | 101 | 29 | 44 |
| 259 | 130 | -29 | 130 | -38 | 757  | 105 | 37 | 40 |
| 281 | 166 | -1  | 166 | -12 | 578  | 85  | 25 | 45 |
| 314 | 175 | -22 | 175 | -38 | 571  | 82  | 27 | 37 |
| 318 | 177 | -14 | 177 | -26 | 693  | 94  | 36 | 35 |
| 311 | 172 | -5  | 172 | -21 | 761  | 103 | 41 | 31 |
| 314 | 177 | -13 | 177 | -26 | 729  | 93  | 41 | 28 |
| 297 | 174 | -1  | 174 | -14 | 735  | 95  | 40 | 32 |
| 305 | 181 | 5   | 181 | -10 | 672  | 92  | 34 | 34 |
| 298 | 129 | -28 | 144 | -41 | 812  | 118 | 39 | 38 |
| 316 | 164 | -29 | 164 | -41 | 745  | 101 | 39 | 34 |
| 270 | 79  | -3  | 155 | -13 | 1317 | 136 | 73 | 19 |
| 266 | 93  | 9   | 170 | 2   | 1339 | 140 | 85 | 16 |
| 304 | 185 | 11  | 185 | -3  | 1035 | 117 | 51 | 26 |
| 251 | 112 | 226 | 226 | 67  | 1271 | 150 | 73 | 24 |
| 291 | 121 | -33 | 136 | -45 | 943  | 131 | 52 | 31 |
| 291 | 121 | -33 | 136 | -45 | 943  | 131 | 52 | 31 |
| 305 | 145 | -22 | 159 | -35 | 782  | 112 | 42 | 36 |
| 312 | 177 | 8   | 192 | -5  | 647  | 95  | 36 | 31 |
| 318 | 185 | 12  | 200 | -1  | 608  | 90  | 34 | 31 |
| 328 | 160 | -11 | 174 | -28 | 616  | 94  | 27 | 45 |
| 308 | 159 | -6  | 177 | -17 | 670  | 89  | 41 | 27 |



|     |     |     |     |     |      |     |    |    |
|-----|-----|-----|-----|-----|------|-----|----|----|
| 245 | 41  | 167 | 167 | 34  | 967  | 105 | 51 | 18 |
| 271 | 120 | 179 | 179 | 33  | 633  | 70  | 34 | 18 |
| 250 | 109 | 196 | 196 | 51  | 797  | 81  | 42 | 15 |
| 205 | 113 | 65  | 166 | 39  | 650  | 78  | 40 | 18 |
| 208 | 56  | 167 | 167 | 47  | 763  | 85  | 49 | 17 |
| 236 | 107 | 65  | 173 | 31  | 662  | 63  | 45 | 9  |
| 247 | 131 | 20  | 150 | 11  | 849  | 102 | 52 | 20 |
| 242 | 171 | 55  | 171 | 14  | 864  | 87  | 59 | 13 |
| 262 | 125 | 41  | 177 | 31  | 826  | 86  | 51 | 15 |
| 249 | 22  | 52  | 169 | 11  | 877  | 87  | 57 | 14 |
| 246 | 167 | 55  | 167 | 15  | 722  | 79  | 42 | 18 |
| 259 | 14  | 80  | 163 | 3   | 1155 | 110 | 80 | 11 |
| 237 | 26  | 88  | 166 | 18  | 986  | 106 | 64 | 13 |
| 268 | 26  | 58  | 178 | 16  | 976  | 94  | 68 | 11 |
| 207 | 155 | 27  | 158 | 10  | 584  | 62  | 32 | 20 |
| 217 | 90  | 29  | 152 | 8   | 791  | 88  | 42 | 22 |
| 209 | 92  | 25  | 152 | 7   | 618  | 67  | 35 | 19 |
| 236 | 151 | 22  | 158 | 0   | 713  | 75  | 38 | 23 |
| 231 | 154 | 22  | 160 | 2   | 585  | 66  | 34 | 21 |
| 234 | 156 | 27  | 156 | 2   | 696  | 75  | 44 | 17 |
| 246 | 163 | 27  | 163 | 1   | 569  | 67  | 27 | 25 |
| 236 | 162 | 41  | 162 | 11  | 740  | 79  | 43 | 17 |
| 240 | 160 | 39  | 160 | 7   | 749  | 79  | 47 | 16 |
| 246 | 161 | 37  | 161 | 5   | 743  | 79  | 43 | 18 |
| 243 | 160 | 39  | 160 | 5   | 753  | 83  | 50 | 17 |
| 245 | 155 | 34  | 155 | -2  | 778  | 87  | 50 | 18 |
| 248 | 157 | 3   | 157 | -4  | 719  | 83  | 47 | 17 |
| 260 | 166 | 35  | 166 | 0   | 653  | 73  | 38 | 19 |
| 242 | 147 | 20  | 147 | -12 | 827  | 90  | 56 | 14 |
| 260 | 171 | 6   | 171 | -1  | 568  | 66  | 31 | 23 |
| 271 | 175 | 4   | 175 | -5  | 556  | 64  | 31 | 22 |
| 218 | 10  | 66  | 144 | 1   | 1125 | 126 | 78 | 14 |
| 224 | 147 | 34  | 147 | 1   | 941  | 101 | 60 | 15 |
| 239 | 169 | 53  | 169 | 19  | 769  | 77  | 49 | 14 |
| 239 | 169 | 53  | 169 | 19  | 769  | 77  | 49 | 14 |
| 228 | 164 | 51  | 164 | 20  | 790  | 78  | 47 | 14 |
| 228 | 1   | 24  | 139 | -10 | 1135 | 123 | 71 | 16 |
| 238 | 10  | 36  | 154 | 0   | 936  | 94  | 61 | 12 |
| 231 | 15  | 40  | 155 | 7   | 939  | 93  | 62 | 12 |
| 232 | 14  | 40  | 154 | 6   | 938  | 93  | 63 | 12 |
| 232 | 14  | 40  | 154 | 6   | 938  | 93  | 63 | 12 |
| 241 | 163 | 46  | 163 | 10  | 795  | 81  | 52 | 14 |
| 238 | 161 | 45  | 161 | 11  | 792  | 83  | 53 | 14 |
| 242 | 146 | 41  | 160 | 4   | 821  | 81  | 54 | 11 |
| 248 | 171 | 51  | 171 | 13  | 665  | 65  | 42 | 13 |
| 245 | 138 | 32  | 153 | -6  | 891  | 88  | 58 | 12 |
| 264 | 177 | 22  | 177 | 10  | 651  | 72  | 40 | 17 |
| 264 | 177 | 22  | 177 | 10  | 651  | 72  | 40 | 17 |
| 264 | 163 | 7   | 163 | -4  | 714  | 81  | 43 | 17 |
| 264 | 163 | 7   | 163 | -4  | 714  | 81  | 43 | 17 |

|     |     |     |     |     |      |     |    |    |
|-----|-----|-----|-----|-----|------|-----|----|----|
| 264 | 163 | 7   | 163 | -4  | 714  | 81  | 43 | 17 |
| 266 | 161 | 5   | 161 | -6  | 743  | 83  | 45 | 16 |
| 249 | 155 | 33  | 155 | -4  | 789  | 86  | 51 | 16 |
| 259 | 150 | 26  | 150 | -11 | 789  | 86  | 50 | 15 |
| 276 | 171 | 11  | 171 | -2  | 647  | 75  | 39 | 18 |
| 249 | 151 | -1  | 151 | -9  | 762  | 85  | 51 | 16 |
| 256 | 151 | -12 | 151 | -20 | 687  | 85  | 40 | 25 |
| 257 | 159 | -5  | 159 | -13 | 665  | 85  | 38 | 26 |
|     |     |     |     |     |      |     |    |    |
| 242 | 9   | 33  | 150 | -1  | 879  | 91  | 55 | 13 |
| 241 | 174 | 59  | 174 | 25  | 747  | 79  | 48 | 16 |
| 245 | 11  | 35  | 152 | 1   | 851  | 87  | 53 | 13 |
| 253 | 165 | 45  | 165 | 5   | 664  | 70  | 44 | 15 |
| 255 | 163 | 43  | 163 | 4   | 738  | 77  | 49 | 14 |
| 255 | 163 | 43  | 163 | 4   | 738  | 77  | 49 | 14 |
| 243 | 165 | 47  | 165 | 10  | 720  | 71  | 46 | 13 |
| 258 | 168 | 17  | 168 | 6   | 958  | 109 | 61 | 19 |
| 261 | 156 | 3   | 156 | -8  | 910  | 111 | 54 | 26 |
| 262 | 167 | 16  | 167 | 4   | 786  | 97  | 47 | 25 |
| 259 | 152 | 0   | 152 | -11 | 933  | 113 | 56 | 26 |
| 271 | 166 | 7   | 166 | -5  | 676  | 79  | 42 | 18 |
| 263 | 154 | 1   | 154 | -11 | 984  | 122 | 55 | 30 |
| 272 | 155 | 22  | 155 | -23 | 686  | 85  | 39 | 26 |
| 285 | 156 | 21  | 156 | -25 | 898  | 106 | 55 | 22 |
| 310 | 199 | 29  | 199 | 14  | 1080 | 124 | 53 | 23 |
| 276 | 124 | -39 | 124 | -50 | 1067 | 138 | 56 | 32 |
| 261 | 142 | 9   | 142 | -29 | 739  | 91  | 43 | 24 |
| 280 | 146 | 12  | 146 | -31 | 967  | 120 | 57 | 26 |
| 291 | 135 | -43 | 135 | -48 | 935  | 134 | 45 | 38 |
| 323 | 181 | -11 | 181 | -27 | 686  | 101 | 29 | 44 |
| 259 | 130 | -29 | 130 | -38 | 757  | 105 | 37 | 40 |
| 281 | 166 | -1  | 166 | -12 | 578  | 85  | 25 | 45 |
| 314 | 175 | -22 | 175 | -38 | 571  | 82  | 27 | 37 |
| 318 | 177 | -14 | 177 | -26 | 693  | 94  | 36 | 35 |
| 305 | 175 | -1  | 175 | -16 | 728  | 101 | 36 | 35 |
| 311 | 172 | -5  | 172 | -21 | 761  | 103 | 41 | 31 |
| 314 | 177 | -13 | 177 | -26 | 729  | 93  | 41 | 28 |
| 297 | 174 | -1  | 174 | -14 | 735  | 95  | 40 | 32 |
| 305 | 181 | 5   | 181 | -10 | 672  | 92  | 34 | 34 |
| 298 | 129 | -28 | 144 | -41 | 812  | 118 | 39 | 38 |
| 316 | 164 | -29 | 164 | -41 | 745  | 101 | 39 | 34 |
| 270 | 79  | -3  | 155 | -13 | 1317 | 136 | 73 | 19 |
| 266 | 93  | 9   | 170 | 2   | 1339 | 140 | 85 | 16 |
| 304 | 185 | 11  | 185 | -3  | 1035 | 117 | 51 | 26 |
| 291 | 121 | -33 | 136 | -45 | 943  | 131 | 52 | 31 |
| 305 | 145 | -22 | 159 | -35 | 782  | 112 | 42 | 36 |
| 318 | 185 | 12  | 200 | -1  | 608  | 90  | 34 | 31 |
| 283 | 138 | -15 | 154 | -24 | 817  | 124 | 45 | 37 |
| 328 | 160 | -11 | 174 | -28 | 616  | 94  | 27 | 45 |
| 323 | 159 | -21 | 174 | -35 | 583  | 89  | 26 | 47 |

|     |     |     |     |     |      |     |    |    |
|-----|-----|-----|-----|-----|------|-----|----|----|
| 308 | 159 | -6  | 177 | -17 | 670  | 89  | 41 | 27 |
| 318 | 162 | -35 | 162 | -48 | 698  | 96  | 34 | 36 |
| 245 | 41  | 167 | 167 | 34  | 967  | 105 | 51 | 18 |
| 271 | 120 | 179 | 179 | 33  | 633  | 70  | 34 | 18 |
| 208 | 56  | 167 | 167 | 47  | 763  | 85  | 49 | 17 |
| 251 | 146 | 52  | 163 | 20  | 786  | 94  | 48 | 21 |
| 249 | 22  | 52  | 169 | 11  | 877  | 87  | 57 | 14 |
| 269 | 88  | 160 | 160 | 1   | 1008 | 97  | 63 | 11 |
| 207 | 155 | 27  | 158 | 10  | 584  | 62  | 32 | 20 |
| 217 | 90  | 29  | 152 | 8   | 791  | 88  | 42 | 22 |
| 209 | 92  | 25  | 152 | 7   | 618  | 67  | 35 | 19 |
| 236 | 162 | 41  | 162 | 11  | 740  | 79  | 43 | 17 |
| 240 | 160 | 39  | 160 | 7   | 749  | 79  | 47 | 16 |
| 245 | 155 | 34  | 155 | -2  | 778  | 87  | 50 | 18 |
| 260 | 166 | 35  | 166 | 0   | 653  | 73  | 38 | 19 |
| 242 | 147 | 20  | 147 | -12 | 827  | 90  | 56 | 14 |
| 260 | 171 | 6   | 171 | -1  | 568  | 66  | 31 | 23 |
| 242 | 146 | 41  | 160 | 4   | 821  | 81  | 54 | 11 |
| 248 | 171 | 51  | 171 | 13  | 665  | 65  | 42 | 13 |
| 264 | 177 | 22  | 177 | 10  | 651  | 72  | 40 | 17 |
| 264 | 177 | 22  | 177 | 10  | 651  | 72  | 40 | 17 |
| 264 | 163 | 7   | 163 | -4  | 714  | 81  | 43 | 17 |
| 266 | 161 | 5   | 161 | -6  | 743  | 83  | 45 | 16 |
| 259 | 150 | 26  | 150 | -11 | 789  | 86  | 50 | 15 |
| 276 | 171 | 11  | 171 | -2  | 647  | 75  | 39 | 18 |
| 249 | 151 | -1  | 151 | -9  | 762  | 85  | 51 | 16 |
| 256 | 151 | -12 | 151 | -20 | 687  | 85  | 40 | 25 |
| 257 | 159 | -5  | 159 | -13 | 665  | 85  | 38 | 26 |
| 242 | 9   | 33  | 150 | -1  | 879  | 91  | 55 | 13 |
| 241 | 174 | 59  | 174 | 25  | 747  | 79  | 48 | 16 |
| 245 | 11  | 35  | 152 | 1   | 851  | 87  | 53 | 13 |
| 253 | 165 | 45  | 165 | 5   | 664  | 70  | 44 | 15 |
| 255 | 163 | 43  | 163 | 4   | 738  | 77  | 49 | 14 |
| 243 | 165 | 47  | 165 | 10  | 720  | 71  | 46 | 13 |
| 258 | 168 | 17  | 168 | 6   | 958  | 109 | 61 | 19 |
| 262 | 167 | 16  | 167 | 4   | 786  | 97  | 47 | 25 |
| 259 | 152 | 0   | 152 | -11 | 933  | 113 | 56 | 26 |
| 271 | 166 | 7   | 166 | -5  | 676  | 79  | 42 | 18 |
| 263 | 154 | 1   | 154 | -11 | 984  | 122 | 55 | 30 |
| 272 | 155 | 22  | 155 | -23 | 686  | 85  | 39 | 26 |
| 285 | 156 | 21  | 156 | -25 | 898  | 106 | 55 | 22 |
| 310 | 199 | 29  | 199 | 14  | 1080 | 124 | 53 | 23 |
| 261 | 142 | 9   | 142 | -29 | 739  | 91  | 43 | 24 |
| 280 | 146 | 12  | 146 | -31 | 967  | 120 | 57 | 26 |
| 316 | 162 | -32 | 162 | -43 | 744  | 103 | 37 | 36 |
| 318 | 177 | -14 | 177 | -26 | 693  | 94  | 36 | 35 |
| 297 | 174 | -1  | 174 | -14 | 735  | 95  | 40 | 32 |
| 305 | 181 | 5   | 181 | -10 | 672  | 92  | 34 | 34 |
| 298 | 129 | -28 | 144 | -41 | 812  | 118 | 39 | 38 |
| 318 | 185 | 12  | 200 | -1  | 608  | 90  | 34 | 31 |

|     |     |     |     |     |      |     |    |    |
|-----|-----|-----|-----|-----|------|-----|----|----|
| 245 | 41  | 167 | 167 | 34  | 967  | 105 | 51 | 18 |
| 255 | 134 | 54  | 185 | 41  | 830  | 86  | 53 | 13 |
| 236 | 107 | 65  | 173 | 31  | 662  | 63  | 45 | 9  |
| 251 | 146 | 52  | 163 | 20  | 786  | 94  | 48 | 21 |
| 249 | 22  | 52  | 169 | 11  | 877  | 87  | 57 | 14 |
| 207 | 155 | 27  | 158 | 10  | 584  | 62  | 32 | 20 |
| 217 | 90  | 29  | 152 | 8   | 791  | 88  | 42 | 22 |
| 209 | 92  | 25  | 152 | 7   | 618  | 67  | 35 | 19 |
| 234 | 163 | 42  | 163 | 13  | 753  | 79  | 43 | 17 |
| 236 | 162 | 41  | 162 | 11  | 740  | 79  | 43 | 17 |
| 240 | 160 | 39  | 160 | 7   | 749  | 79  | 47 | 16 |
| 246 | 161 | 37  | 161 | 5   | 743  | 79  | 43 | 18 |
| 245 | 155 | 34  | 155 | -2  | 778  | 87  | 50 | 18 |
| 260 | 166 | 35  | 166 | 0   | 653  | 73  | 38 | 19 |
| 242 | 147 | 20  | 147 | -12 | 827  | 90  | 56 | 14 |
| 242 | 146 | 41  | 160 | 4   | 821  | 81  | 54 | 11 |
| 248 | 171 | 51  | 171 | 13  | 665  | 65  | 42 | 13 |
| 264 | 177 | 22  | 177 | 10  | 651  | 72  | 40 | 17 |
| 264 | 177 | 22  | 177 | 10  | 651  | 72  | 40 | 17 |
| 264 | 163 | 7   | 163 | -4  | 714  | 81  | 43 | 17 |
| 266 | 161 | 5   | 161 | -6  | 743  | 83  | 45 | 16 |
| 259 | 150 | 26  | 150 | -11 | 789  | 86  | 50 | 15 |
| 276 | 171 | 11  | 171 | -2  | 647  | 75  | 39 | 18 |
| 249 | 151 | -1  | 151 | -9  | 762  | 85  | 51 | 16 |
| 256 | 151 | -12 | 151 | -20 | 687  | 85  | 40 | 25 |
| 257 | 159 | -5  | 159 | -13 | 665  | 85  | 38 | 26 |
| 242 | 9   | 33  | 150 | -1  | 879  | 91  | 55 | 13 |
| 241 | 174 | 59  | 174 | 25  | 747  | 79  | 48 | 16 |
| 245 | 11  | 35  | 152 | 1   | 851  | 87  | 53 | 13 |
| 253 | 165 | 45  | 165 | 5   | 664  | 70  | 44 | 15 |
| 255 | 163 | 43  | 163 | 4   | 738  | 77  | 49 | 14 |
| 243 | 165 | 47  | 165 | 10  | 720  | 71  | 46 | 13 |
| 258 | 168 | 17  | 168 | 6   | 958  | 109 | 61 | 19 |
| 262 | 167 | 16  | 167 | 4   | 786  | 97  | 47 | 25 |
| 259 | 152 | 0   | 152 | -11 | 933  | 113 | 56 | 26 |
| 263 | 154 | 1   | 154 | -11 | 984  | 122 | 55 | 30 |
| 272 | 155 | 22  | 155 | -23 | 686  | 85  | 39 | 26 |
| 285 | 156 | 21  | 156 | -25 | 898  | 106 | 55 | 22 |
| 310 | 199 | 29  | 199 | 14  | 1080 | 124 | 53 | 23 |
| 261 | 142 | 9   | 142 | -29 | 739  | 91  | 43 | 24 |
| 280 | 146 | 12  | 146 | -31 | 967  | 120 | 57 | 26 |
| 291 | 135 | -43 | 135 | -48 | 935  | 134 | 45 | 38 |
| 318 | 177 | -14 | 177 | -26 | 693  | 94  | 36 | 35 |
| 305 | 175 | -1  | 175 | -16 | 728  | 101 | 36 | 35 |
| 297 | 174 | -1  | 174 | -14 | 735  | 95  | 40 | 32 |
| 305 | 181 | 5   | 181 | -10 | 672  | 92  | 34 | 34 |
| 298 | 129 | -28 | 144 | -41 | 812  | 118 | 39 | 38 |
| 316 | 164 | -29 | 164 | -41 | 745  | 101 | 39 | 34 |
| 318 | 162 | -35 | 162 | -48 | 698  | 96  | 34 | 36 |
| 247 | 131 | 20  | 150 | 11  | 849  | 102 | 52 | 20 |

|     |     |     |     |     |      |     |    |    |
|-----|-----|-----|-----|-----|------|-----|----|----|
| 262 | 125 | 41  | 177 | 31  | 826  | 86  | 51 | 15 |
| 246 | 167 | 55  | 167 | 15  | 722  | 79  | 42 | 18 |
| 209 | 92  | 25  | 152 | 7   | 618  | 67  | 35 | 19 |
| 231 | 154 | 22  | 160 | 2   | 585  | 66  | 34 | 21 |
| 236 | 162 | 41  | 162 | 11  | 740  | 79  | 43 | 17 |
| 240 | 160 | 39  | 160 | 7   | 749  | 79  | 47 | 16 |
| 246 | 161 | 37  | 161 | 5   | 743  | 79  | 43 | 18 |
| 243 | 160 | 39  | 160 | 5   | 753  | 83  | 50 | 17 |
| 245 | 155 | 34  | 155 | -2  | 778  | 87  | 50 | 18 |
| 260 | 166 | 35  | 166 | 0   | 653  | 73  | 38 | 19 |
| 242 | 147 | 20  | 147 | -12 | 827  | 90  | 56 | 14 |
| 239 | 169 | 53  | 169 | 19  | 769  | 77  | 49 | 14 |
| 242 | 146 | 41  | 160 | 4   | 821  | 81  | 54 | 11 |
| 248 | 171 | 51  | 171 | 13  | 665  | 65  | 42 | 13 |
| 264 | 177 | 22  | 177 | 10  | 651  | 72  | 40 | 17 |
| 264 | 177 | 22  | 177 | 10  | 651  | 72  | 40 | 17 |
| 264 | 163 | 7   | 163 | -4  | 714  | 81  | 43 | 17 |
| 276 | 171 | 11  | 171 | -2  | 647  | 75  | 39 | 18 |
| 249 | 151 | -1  | 151 | -9  | 762  | 85  | 51 | 16 |
| 242 | 9   | 33  | 150 | -1  | 879  | 91  | 55 | 13 |
| 241 | 174 | 59  | 174 | 25  | 747  | 79  | 48 | 16 |
| 253 | 165 | 45  | 165 | 5   | 664  | 70  | 44 | 15 |
| 255 | 163 | 43  | 163 | 4   | 738  | 77  | 49 | 14 |
| 243 | 165 | 47  | 165 | 10  | 720  | 71  | 46 | 13 |
| 258 | 168 | 17  | 168 | 6   | 958  | 109 | 61 | 19 |
| 259 | 152 | 0   | 152 | -11 | 933  | 113 | 56 | 26 |
| 285 | 156 | 21  | 156 | -25 | 898  | 106 | 55 | 22 |
| 297 | 174 | -1  | 174 | -14 | 735  | 95  | 40 | 32 |
| 305 | 181 | 5   | 181 | -10 | 672  | 92  | 34 | 34 |
| 316 | 164 | -29 | 164 | -41 | 745  | 101 | 39 | 34 |
| 266 | 93  | 9   | 170 | 2   | 1339 | 140 | 85 | 16 |
| 304 | 185 | 11  | 185 | -3  | 1035 | 117 | 51 | 26 |
| 305 | 145 | -22 | 159 | -35 | 782  | 112 | 42 | 36 |
| 328 | 160 | -11 | 174 | -28 | 616  | 94  | 27 | 45 |
| 247 | 131 | 20  | 150 | 11  | 849  | 102 | 52 | 20 |
| 246 | 167 | 55  | 167 | 15  | 722  | 79  | 42 | 18 |
| 268 | 26  | 58  | 178 | 16  | 976  | 94  | 68 | 11 |
| 209 | 92  | 25  | 152 | 7   | 618  | 67  | 35 | 19 |
| 231 | 154 | 22  | 160 | 2   | 585  | 66  | 34 | 21 |
| 236 | 162 | 41  | 162 | 11  | 740  | 79  | 43 | 17 |
| 245 | 155 | 34  | 155 | -2  | 778  | 87  | 50 | 18 |
| 242 | 147 | 20  | 147 | -12 | 827  | 90  | 56 | 14 |
| 239 | 169 | 53  | 169 | 19  | 769  | 77  | 49 | 14 |
| 242 | 146 | 41  | 160 | 4   | 821  | 81  | 54 | 11 |
| 264 | 177 | 22  | 177 | 10  | 651  | 72  | 40 | 17 |
| 264 | 163 | 7   | 163 | -4  | 714  | 81  | 43 | 17 |
| 276 | 171 | 11  | 171 | -2  | 647  | 75  | 39 | 18 |
| 249 | 151 | -1  | 151 | -9  | 762  | 85  | 51 | 16 |
| 242 | 9   | 33  | 150 | -1  | 879  | 91  | 55 | 13 |
| 255 | 163 | 43  | 163 | 4   | 738  | 77  | 49 | 14 |

|     |     |     |     |     |      |     |    |    |
|-----|-----|-----|-----|-----|------|-----|----|----|
| 243 | 165 | 47  | 165 | 10  | 720  | 71  | 46 | 13 |
| 258 | 168 | 17  | 168 | 6   | 958  | 109 | 61 | 19 |
| 259 | 152 | 0   | 152 | -11 | 933  | 113 | 56 | 26 |
| 285 | 156 | 21  | 156 | -25 | 898  | 106 | 55 | 22 |
| 297 | 174 | -1  | 174 | -14 | 735  | 95  | 40 | 32 |
| 305 | 181 | 5   | 181 | -10 | 672  | 92  | 34 | 34 |
| 316 | 164 | -29 | 164 | -41 | 745  | 101 | 39 | 34 |
| 266 | 93  | 9   | 170 | 2   | 1339 | 140 | 85 | 16 |
| 305 | 145 | -22 | 159 | -35 | 782  | 112 | 42 | 36 |
| 328 | 160 | -11 | 174 | -28 | 616  | 94  | 27 | 45 |
| 232 | 44  | 66  | 168 | 35  | 691  | 69  | 49 | 12 |
| 219 | 78  | 70  | 168 | 43  | 682  | 75  | 44 | 16 |
| 245 | 41  | 167 | 167 | 34  | 967  | 105 | 51 | 18 |
| 264 | 133 | 49  | 185 | 38  | 795  | 83  | 48 | 14 |
| 260 | 18  | 48  | 169 | 7   | 1097 | 104 | 78 | 10 |
| 251 | 94  | 201 | 201 | 55  | 770  | 79  | 39 | 16 |
| 226 | 17  | 41  | 156 | 10  | 883  | 89  | 57 | 13 |
| 234 | 67  | 62  | 170 | 27  | 812  | 75  | 54 | 10 |
| 227 | 166 | 55  | 166 | 23  | 786  | 78  | 45 | 14 |
| 220 | 155 | 46  | 158 | 21  | 804  | 78  | 49 | 15 |
| 302 | 33  | 197 | 202 | 17  | 546  | 62  | 28 | 22 |
| 194 | 16  | 75  | 118 | 6   | 920  | 92  | 56 | 16 |
| 204 | 44  | 56  | 152 | 35  | 706  | 73  | 45 | 14 |
| 196 | 28  | 98  | 137 | 20  | 1063 | 114 | 62 | 21 |
| 217 | 90  | 29  | 152 | 8   | 791  | 88  | 42 | 22 |
| 224 | 155 | 24  | 158 | 6   | 600  | 63  | 31 | 20 |
| 227 | 152 | 25  | 159 | 5   | 634  | 66  | 34 | 21 |
| 233 | 152 | 22  | 158 | 1   | 596  | 68  | 34 | 21 |
| 242 | 80  | 12  | 154 | -14 | 747  | 86  | 39 | 25 |
| 252 | 166 | 35  | 166 | 4   | 667  | 72  | 39 | 17 |
| 233 | 12  | 38  | 153 | 4   | 945  | 94  | 63 | 12 |
| 266 | 159 | 33  | 159 | -9  | 779  | 85  | 47 | 15 |
| 259 | 171 | 10  | 171 | 1   | 561  | 65  | 34 | 21 |
| 260 | 156 | 4   | 156 | -8  | 889  | 109 | 53 | 25 |
| 270 | 165 | 6   | 165 | -6  | 685  | 80  | 42 | 18 |
| 256 | 171 | 50  | 171 | 10  | 898  | 111 | 57 | 21 |
| 268 | 106 | -23 | 106 | -60 | 1524 | 186 | 88 | 25 |
| 283 | 127 | -38 | 127 | -50 | 1184 | 153 | 63 | 31 |
| 276 | 131 | 49  | 208 | 38  | 1251 | 130 | 76 | 18 |
| 262 | 148 | 5   | 148 | -34 | 624  | 79  | 29 | 30 |
| 307 | 165 | -18 | 165 | -32 | 875  | 127 | 42 | 40 |
| 245 | 155 | 34  | 155 | -2  | 778  | 87  | 50 | 18 |
| 269 | 142 | 8   | 142 | -33 | 865  | 102 | 52 | 21 |
| 249 | 126 | -34 | 126 | -42 | 769  | 96  | 44 | 28 |
| 291 | 157 | -14 | 157 | -27 | 815  | 113 | 42 | 35 |
| 247 | 134 | -26 | 134 | -33 | 817  | 96  | 50 | 21 |
| 272 | 131 | -2  | 131 | -42 | 1124 | 132 | 68 | 23 |
| 302 | 172 | 7   | 187 | -9  | 688  | 94  | 35 | 27 |
| 258 | 76  | -7  | 151 | -14 | 1345 | 141 | 83 | 16 |
| 311 | 159 | -29 | 172 | -38 | 621  | 91  | 30 | 39 |

|     |     |     |     |     |      |     |    |    |
|-----|-----|-----|-----|-----|------|-----|----|----|
| 296 | 151 | -33 | 151 | -44 | 782  | 108 | 40 | 35 |
| 279 | 164 | -4  | 164 | -16 | 558  | 76  | 25 | 39 |
| 262 | 148 | 5   | 148 | -34 | 624  | 79  | 29 | 30 |
| 288 | 164 | -6  | 164 | -19 | 688  | 97  | 34 | 39 |
| 240 | 166 | 33  | 166 | 5   | 596  | 64  | 33 | 19 |
| 260 | 18  | 48  | 169 | 7   | 1097 | 104 | 78 | 10 |
| 251 | 94  | 201 | 201 | 55  | 770  | 79  | 39 | 16 |
| 234 | 67  | 62  | 170 | 27  | 812  | 75  | 54 | 10 |
| 227 | 166 | 55  | 166 | 23  | 786  | 78  | 45 | 14 |
| 194 | 16  | 75  | 118 | 6   | 920  | 92  | 56 | 16 |
| 217 | 90  | 29  | 152 | 8   | 791  | 88  | 42 | 22 |
| 227 | 152 | 25  | 159 | 5   | 634  | 66  | 34 | 21 |
| 252 | 166 | 35  | 166 | 4   | 667  | 72  | 39 | 17 |
| 260 | 156 | 4   | 156 | -8  | 889  | 109 | 53 | 25 |
| 268 | 106 | -23 | 106 | -60 | 1524 | 186 | 88 | 25 |
| 279 | 164 | -4  | 164 | -16 | 558  | 76  | 25 | 39 |
| 249 | 126 | -34 | 126 | -42 | 769  | 96  | 44 | 28 |
| 272 | 131 | -2  | 131 | -42 | 1124 | 132 | 68 | 23 |
| 258 | 76  | -7  | 151 | -14 | 1345 | 141 | 83 | 16 |
| 296 | 151 | -33 | 151 | -44 | 782  | 108 | 40 | 35 |
| 262 | 148 | 5   | 148 | -34 | 624  | 79  | 29 | 30 |
| 240 | 166 | 33  | 166 | 5   | 596  | 64  | 33 | 19 |
| 232 | 44  | 66  | 168 | 35  | 691  | 69  | 49 | 12 |
| 219 | 78  | 70  | 168 | 43  | 682  | 75  | 44 | 16 |
| 245 | 41  | 167 | 167 | 34  | 967  | 105 | 51 | 18 |
| 264 | 133 | 49  | 185 | 38  | 795  | 83  | 48 | 14 |
| 188 | 64  | 100 | 165 | 54  | 755  | 86  | 45 | 20 |
| 260 | 18  | 48  | 169 | 7   | 1097 | 104 | 78 | 10 |
| 210 | 50  | 148 | 163 | 41  | 822  | 92  | 49 | 22 |
| 196 | 28  | 98  | 137 | 20  | 1063 | 114 | 62 | 21 |
| 227 | 152 | 25  | 159 | 5   | 634  | 66  | 34 | 21 |
| 242 | 80  | 12  | 154 | -14 | 747  | 86  | 39 | 25 |
| 252 | 166 | 35  | 166 | 4   | 667  | 72  | 39 | 17 |
| 259 | 171 | 10  | 171 | 1   | 561  | 65  | 34 | 21 |
| 260 | 156 | 4   | 156 | -8  | 889  | 109 | 53 | 25 |
| 283 | 127 | -38 | 127 | -50 | 1184 | 153 | 63 | 31 |
| 276 | 131 | 49  | 208 | 38  | 1251 | 130 | 76 | 18 |
| 262 | 148 | 5   | 148 | -34 | 624  | 79  | 29 | 30 |
| 296 | 151 | -33 | 151 | -44 | 782  | 108 | 40 | 35 |
| 291 | 157 | -14 | 157 | -27 | 815  | 113 | 42 | 35 |
| 272 | 131 | -2  | 131 | -42 | 1124 | 132 | 68 | 23 |
| 318 | 175 | -13 | 175 | -30 | 711  | 105 | 30 | 44 |
| 232 | 44  | 66  | 168 | 35  | 691  | 69  | 49 | 12 |
| 219 | 78  | 70  | 168 | 43  | 682  | 75  | 44 | 16 |
| 188 | 64  | 100 | 165 | 54  | 755  | 86  | 45 | 20 |
| 260 | 18  | 48  | 169 | 7   | 1097 | 104 | 78 | 10 |
| 251 | 94  | 201 | 201 | 55  | 770  | 79  | 39 | 16 |
| 226 | 17  | 41  | 156 | 10  | 883  | 89  | 57 | 13 |
| 234 | 67  | 62  | 170 | 27  | 812  | 75  | 54 | 10 |
| 227 | 166 | 55  | 166 | 23  | 786  | 78  | 45 | 14 |

|     |     |     |     |     |      |     |    |    |
|-----|-----|-----|-----|-----|------|-----|----|----|
| 220 | 155 | 46  | 158 | 21  | 804  | 78  | 49 | 15 |
| 194 | 16  | 75  | 118 | 6   | 920  | 92  | 56 | 16 |
| 217 | 90  | 29  | 152 | 8   | 791  | 88  | 42 | 22 |
| 227 | 152 | 25  | 159 | 5   | 634  | 66  | 34 | 21 |
| 233 | 12  | 38  | 153 | 4   | 945  | 94  | 63 | 12 |
| 260 | 156 | 4   | 156 | -8  | 889  | 109 | 53 | 25 |
| 270 | 165 | 6   | 165 | -6  | 685  | 80  | 42 | 18 |
| 256 | 171 | 50  | 171 | 10  | 898  | 111 | 57 | 21 |
| 268 | 106 | -23 | 106 | -60 | 1524 | 186 | 88 | 25 |
| 283 | 127 | -38 | 127 | -50 | 1184 | 153 | 63 | 31 |
| 276 | 131 | 49  | 208 | 38  | 1251 | 130 | 76 | 18 |
| 262 | 148 | 5   | 148 | -34 | 624  | 79  | 29 | 30 |
| 307 | 165 | -18 | 165 | -32 | 875  | 127 | 42 | 40 |
| 245 | 155 | 34  | 155 | -2  | 778  | 87  | 50 | 18 |
| 296 | 151 | -33 | 151 | -44 | 782  | 108 | 40 | 35 |
| 269 | 142 | 8   | 142 | -33 | 865  | 102 | 52 | 21 |
| 249 | 126 | -34 | 126 | -42 | 769  | 96  | 44 | 28 |
| 291 | 157 | -14 | 157 | -27 | 815  | 113 | 42 | 35 |
| 272 | 131 | -2  | 131 | -42 | 1124 | 132 | 68 | 23 |
| 258 | 76  | -7  | 151 | -14 | 1345 | 141 | 83 | 16 |
| 270 | 79  | -3  | 155 | -13 | 1317 | 136 | 73 | 19 |
| 266 | 93  | 9   | 170 | 1   | 1347 | 142 | 86 | 16 |
| 296 | 151 | -33 | 151 | -44 | 782  | 108 | 40 | 35 |
| 279 | 164 | -4  | 164 | -16 | 558  | 76  | 25 | 39 |
| 318 | 175 | -13 | 175 | -30 | 711  | 105 | 30 | 44 |
| 262 | 148 | 5   | 148 | -34 | 624  | 79  | 29 | 30 |
| 306 | 162 | -18 | 162 | -32 | 894  | 132 | 42 | 40 |
| 244 | 55  | 164 | 164 | 9   | 807  | 104 | 43 | 24 |
| 312 | 182 | 5   | 182 | -12 | 659  | 83  | 36 | 27 |
| 219 | 78  | 70  | 168 | 43  | 682  | 75  | 44 | 16 |
| 264 | 133 | 49  | 185 | 38  | 795  | 83  | 48 | 14 |
| 260 | 18  | 48  | 169 | 7   | 1097 | 104 | 78 | 10 |
| 234 | 67  | 62  | 170 | 27  | 812  | 75  | 54 | 10 |
| 227 | 166 | 55  | 166 | 23  | 786  | 78  | 45 | 14 |
| 302 | 33  | 197 | 202 | 17  | 546  | 62  | 28 | 22 |
| 194 | 16  | 75  | 118 | 6   | 920  | 92  | 56 | 16 |
| 217 | 90  | 29  | 152 | 8   | 791  | 88  | 42 | 22 |
| 227 | 152 | 25  | 159 | 5   | 634  | 66  | 34 | 21 |
| 252 | 166 | 35  | 166 | 4   | 667  | 72  | 39 | 17 |
| 260 | 156 | 4   | 156 | -8  | 889  | 109 | 53 | 25 |
| 256 | 171 | 50  | 171 | 10  | 898  | 111 | 57 | 21 |
| 268 | 106 | -23 | 106 | -60 | 1524 | 186 | 88 | 25 |
| 249 | 126 | -34 | 126 | -42 | 769  | 96  | 44 | 28 |
| 272 | 131 | -2  | 131 | -42 | 1124 | 132 | 68 | 23 |
| 302 | 172 | 7   | 187 | -9  | 688  | 94  | 35 | 27 |
| 258 | 76  | -7  | 151 | -14 | 1345 | 141 | 83 | 16 |
| 296 | 151 | -33 | 151 | -44 | 782  | 108 | 40 | 35 |
| 279 | 164 | -4  | 164 | -16 | 558  | 76  | 25 | 39 |
| 262 | 148 | 5   | 148 | -34 | 624  | 79  | 29 | 30 |
| 188 | 64  | 100 | 165 | 54  | 755  | 86  | 45 | 20 |



|     |     |     |     |     |      |     |    |    |
|-----|-----|-----|-----|-----|------|-----|----|----|
| 260 | 18  | 48  | 169 | 7   | 1097 | 104 | 78 | 10 |
| 234 | 67  | 62  | 170 | 27  | 812  | 75  | 54 | 10 |
| 194 | 16  | 75  | 118 | 6   | 920  | 92  | 56 | 16 |
| 210 | 50  | 148 | 163 | 41  | 822  | 92  | 49 | 22 |
| 227 | 152 | 25  | 159 | 5   | 634  | 66  | 34 | 21 |
| 242 | 80  | 12  | 154 | -14 | 747  | 86  | 39 | 25 |
| 259 | 171 | 10  | 171 | 1   | 561  | 65  | 34 | 21 |
| 260 | 156 | 4   | 156 | -8  | 889  | 109 | 53 | 25 |
| 262 | 148 | 5   | 148 | -34 | 624  | 79  | 29 | 30 |
| 291 | 157 | -14 | 157 | -27 | 815  | 113 | 42 | 35 |
| 272 | 131 | -2  | 131 | -42 | 1124 | 132 | 68 | 23 |
| 318 | 175 | -13 | 175 | -30 | 711  | 105 | 30 | 44 |
| 188 | 64  | 100 | 165 | 54  | 755  | 86  | 45 | 20 |
| 252 | 132 | 19  | 151 | 10  | 807  | 95  | 46 | 20 |
| 255 | 134 | 54  | 185 | 41  | 830  | 86  | 53 | 13 |
| 239 | 50  | 49  | 165 | 13  | 841  | 82  | 56 | 10 |
| 234 | 67  | 62  | 170 | 27  | 812  | 75  | 54 | 10 |
| 227 | 166 | 55  | 166 | 23  | 786  | 78  | 45 | 14 |
| 220 | 155 | 46  | 158 | 21  | 804  | 78  | 49 | 15 |
| 204 | 44  | 56  | 152 | 35  | 706  | 73  | 45 | 14 |
| 227 | 152 | 25  | 159 | 5   | 634  | 66  | 34 | 21 |
| 242 | 80  | 12  | 154 | -14 | 747  | 86  | 39 | 25 |
| 233 | 12  | 38  | 153 | 4   | 945  | 94  | 63 | 12 |
| 266 | 159 | 33  | 159 | -9  | 779  | 85  | 47 | 15 |
| 246 | 150 | 45  | 165 | 7   | 775  | 74  | 50 | 11 |
| 260 | 156 | 4   | 156 | -8  | 889  | 109 | 53 | 25 |
| 262 | 148 | 5   | 148 | -34 | 624  | 79  | 29 | 30 |
| 248 | 157 | 3   | 157 | -4  | 719  | 83  | 47 | 17 |
| 296 | 151 | -33 | 151 | -44 | 782  | 108 | 40 | 35 |
| 281 | 147 | -18 | 147 | -29 | 926  | 120 | 54 | 31 |
| 270 | 144 | -19 | 144 | -30 | 709  | 96  | 36 | 38 |
| 276 | 164 | -12 | 164 | -12 | 574  | 81  | 25 | 42 |
| 296 | 151 | -33 | 151 | -44 | 782  | 108 | 40 | 35 |
| 288 | 164 | -6  | 164 | -19 | 688  | 97  | 34 | 39 |
| 230 | 115 | 215 | 216 | 71  | 595  | 87  | 12 | 51 |
| 286 | 181 | 1   | 181 | -12 | 559  | 70  | 29 | 27 |

| bio16 | bio17 | bio18 | bio19 | bio1p | bio2p | bio3p | bio4p | bio5p |
|-------|-------|-------|-------|-------|-------|-------|-------|-------|
| 292   | 184   | 184   | 274   | 80    | 65    | 28    | 5948  | 205   |
| 184   | 122   | 122   | 166   | 80    | 65    | 28    | 5948  | 205   |
| 220   | 170   | 170   | 196   | 80    | 65    | 28    | 5948  | 205   |
| 204   | 132   | 162   | 163   | 80    | 65    | 28    | 5948  | 205   |
| 237   | 163   | 163   | 215   | 80    | 65    | 28    | 5948  | 205   |
| 180   | 143   | 168   | 161   | 80    | 65    | 28    | 5948  | 205   |
| 256   | 166   | 241   | 180   | 80    | 65    | 28    | 5948  | 205   |
| 241   | 152   | 230   | 165   | 80    | 65    | 28    | 5948  | 205   |
| 232   | 179   | 232   | 210   | 80    | 65    | 28    | 5948  | 205   |
| 223   | 183   | 195   | 204   | 80    | 65    | 28    | 5948  | 205   |
| 217   | 143   | 217   | 182   | 80    | 65    | 28    | 5948  | 205   |
| 323   | 257   | 302   | 307   | 80    | 65    | 28    | 5948  | 205   |
| 268   | 216   | 262   | 249   | 80    | 65    | 28    | 5948  | 205   |
| 176   | 104   | 169   | 112   | 80    | 65    | 28    | 5948  | 205   |
| 246   | 139   | 215   | 180   | 80    | 65    | 28    | 5948  | 205   |
| 183   | 111   | 176   | 122   | 80    | 65    | 28    | 5948  | 205   |
| 221   | 124   | 206   | 169   | 80    | 65    | 28    | 5948  | 205   |
| 181   | 105   | 167   | 138   | 80    | 65    | 28    | 5948  | 205   |
| 208   | 135   | 208   | 165   | 80    | 65    | 28    | 5948  | 205   |
| 206   | 128   | 206   | 151   | 80    | 65    | 28    | 5948  | 205   |
| 194   | 94    | 194   | 120   | 80    | 65    | 28    | 5948  | 205   |
| 230   | 141   | 230   | 164   | 80    | 65    | 28    | 5948  | 205   |
| 231   | 153   | 231   | 174   | 80    | 65    | 28    | 5948  | 205   |
| 230   | 142   | 230   | 168   | 80    | 65    | 28    | 5948  | 205   |
| 237   | 153   | 237   | 175   | 80    | 65    | 28    | 5948  | 205   |
| 246   | 157   | 246   | 180   | 80    | 65    | 28    | 5948  | 205   |
| 210   | 125   | 210   | 142   | 80    | 65    | 28    | 5948  | 205   |
| 248   | 183   | 248   | 192   | 80    | 65    | 28    | 5948  | 205   |
| 189   | 105   | 189   | 119   | 80    | 65    | 28    | 5948  | 205   |
| 325   | 246   | 302   | 316   | 80    | 65    | 28    | 5948  | 205   |
| 276   | 207   | 276   | 264   | 80    | 65    | 28    | 5948  | 205   |
| 228   | 159   | 228   | 184   | 80    | 65    | 28    | 5948  | 205   |
| 228   | 159   | 228   | 184   | 80    | 65    | 28    | 5948  | 205   |
| 225   | 161   | 225   | 192   | 80    | 65    | 28    | 5948  | 205   |
| 340   | 254   | 275   | 326   | 80    | 65    | 28    | 5948  | 205   |
| 259   | 202   | 246   | 247   | 80    | 65    | 28    | 5948  | 205   |
| 257   | 202   | 255   | 246   | 80    | 65    | 28    | 5948  | 205   |
| 257   | 202   | 255   | 246   | 80    | 65    | 28    | 5948  | 205   |
| 232   | 163   | 232   | 193   | 80    | 65    | 28    | 5948  | 205   |
| 222   | 176   | 219   | 209   | 80    | 65    | 28    | 5948  | 205   |
| 193   | 134   | 193   | 156   | 80    | 65    | 28    | 5948  | 205   |
| 250   | 187   | 247   | 220   | 80    | 65    | 28    | 5948  | 205   |
| 199   | 130   | 199   | 139   | 80    | 65    | 28    | 5948  | 205   |
| 199   | 130   | 199   | 139   | 80    | 65    | 28    | 5948  | 205   |
| 219   | 143   | 219   | 157   | 80    | 65    | 28    | 5948  | 205   |
| 219   | 143   | 219   | 157   | 80    | 65    | 28    | 5948  | 205   |
| 219   | 143   | 219   | 157   | 80    | 65    | 28    | 5948  | 205   |
| 224   | 152   | 224   | 167   | 80    | 65    | 28    | 5948  | 205   |
| 241   | 159   | 241   | 183   | 80    | 65    | 28    | 5948  | 205   |

|     |     |     |     |    |    |    |      |     |
|-----|-----|-----|-----|----|----|----|------|-----|
| 232 | 164 | 232 | 185 | 80 | 65 | 28 | 5948 | 205 |
| 201 | 131 | 201 | 143 | 80 | 65 | 28 | 5948 | 205 |
| 234 | 161 | 234 | 172 | 80 | 65 | 28 | 5948 | 205 |
| 239 | 128 | 239 | 136 | 80 | 65 | 28 | 5948 | 205 |
| 234 | 121 | 234 | 128 | 80 | 65 | 28 | 5948 | 205 |
| 248 | 185 | 241 | 238 | 80 | 65 | 28 | 5948 | 205 |
| 233 | 151 | 233 | 170 | 80 | 65 | 28 | 5948 | 205 |
| 238 | 179 | 236 | 229 | 80 | 65 | 28 | 5948 | 205 |
| 201 | 134 | 201 | 159 | 80 | 65 | 28 | 5948 | 205 |
| 220 | 153 | 220 | 180 | 80 | 65 | 28 | 5948 | 205 |
| 220 | 153 | 220 | 180 | 80 | 65 | 28 | 5948 | 205 |
| 209 | 147 | 209 | 176 | 80 | 65 | 28 | 5948 | 205 |
| 300 | 198 | 300 | 206 | 80 | 65 | 28 | 5948 | 205 |
| 316 | 169 | 316 | 180 | 80 | 65 | 28 | 5948 | 205 |
| 265 | 145 | 265 | 155 | 80 | 65 | 28 | 5948 | 205 |
| 272 | 135 | 272 | 142 | 80 | 65 | 28 | 5948 | 205 |
| 323 | 175 | 323 | 186 | 80 | 65 | 28 | 5948 | 205 |
| 216 | 138 | 216 | 150 | 80 | 65 | 28 | 5948 | 205 |
| 359 | 173 | 359 | 180 | 80 | 65 | 28 | 5948 | 205 |
| 241 | 125 | 241 | 145 | 80 | 65 | 28 | 5948 | 205 |
| 243 | 125 | 243 | 145 | 80 | 65 | 28 | 5948 | 205 |
| 293 | 173 | 293 | 214 | 80 | 65 | 28 | 5948 | 205 |
| 331 | 181 | 331 | 186 | 80 | 65 | 28 | 5948 | 205 |
| 399 | 183 | 399 | 187 | 80 | 65 | 28 | 5948 | 205 |
| 254 | 139 | 254 | 158 | 80 | 65 | 28 | 5948 | 205 |
| 340 | 189 | 340 | 206 | 80 | 65 | 28 | 5948 | 205 |
| 369 | 152 | 369 | 162 | 80 | 65 | 28 | 5948 | 205 |
| 292 | 120 | 292 | 131 | 80 | 65 | 28 | 5948 | 205 |
| 287 | 97  | 287 | 102 | 80 | 65 | 28 | 5948 | 205 |
| 308 | 113 | 308 | 123 | 80 | 65 | 28 | 5948 | 205 |
| 243 | 77  | 243 | 81  | 80 | 65 | 28 | 5948 | 205 |
| 222 | 88  | 222 | 95  | 80 | 65 | 28 | 5948 | 205 |
| 267 | 112 | 267 | 126 | 80 | 65 | 28 | 5948 | 205 |
| 274 | 126 | 274 | 138 | 80 | 65 | 28 | 5948 | 205 |
| 259 | 130 | 259 | 147 | 80 | 65 | 28 | 5948 | 205 |
| 276 | 124 | 276 | 133 | 80 | 65 | 28 | 5948 | 205 |
| 253 | 104 | 253 | 113 | 80 | 65 | 28 | 5948 | 205 |
| 311 | 121 | 307 | 124 | 80 | 65 | 28 | 5948 | 205 |
| 286 | 124 | 286 | 136 | 80 | 65 | 28 | 5948 | 205 |
| 389 | 236 | 375 | 249 | 80 | 65 | 28 | 5948 | 205 |
| 408 | 258 | 344 | 286 | 80 | 65 | 28 | 5948 | 205 |
| 335 | 161 | 335 | 181 | 80 | 65 | 28 | 5948 | 205 |
| 430 | 249 | 249 | 329 | 80 | 65 | 28 | 5948 | 205 |
| 338 | 160 | 334 | 169 | 80 | 65 | 28 | 5948 | 205 |
| 338 | 160 | 334 | 169 | 80 | 65 | 28 | 5948 | 205 |
| 302 | 129 | 298 | 143 | 80 | 65 | 28 | 5948 | 205 |
| 237 | 115 | 224 | 132 | 80 | 65 | 28 | 5948 | 205 |
| 222 | 108 | 210 | 125 | 80 | 65 | 28 | 5948 | 205 |
| 260 | 86  | 253 | 92  | 80 | 65 | 28 | 5948 | 205 |
| 238 | 131 | 207 | 137 | 80 | 65 | 28 | 5948 | 205 |

|     |     |     |     |    |    |    |      |     |
|-----|-----|-----|-----|----|----|----|------|-----|
| 292 | 184 | 184 | 274 | 99 | 77 | 33 | 5690 | 224 |
| 184 | 122 | 122 | 166 | 99 | 77 | 33 | 5690 | 224 |
| 220 | 170 | 170 | 196 | 99 | 77 | 33 | 5690 | 224 |
| 204 | 132 | 162 | 163 | 99 | 77 | 33 | 5690 | 224 |
| 237 | 163 | 163 | 215 | 99 | 77 | 33 | 5690 | 224 |
| 180 | 143 | 168 | 161 | 99 | 77 | 33 | 5690 | 224 |
| 256 | 166 | 241 | 180 | 99 | 77 | 33 | 5690 | 224 |
| 232 | 179 | 232 | 210 | 99 | 77 | 33 | 5690 | 224 |
| 223 | 183 | 195 | 204 | 99 | 77 | 33 | 5690 | 224 |
| 237 | 186 | 234 | 234 | 99 | 77 | 33 | 5690 | 224 |
| 217 | 143 | 217 | 182 | 99 | 77 | 33 | 5690 | 224 |
| 323 | 257 | 302 | 307 | 99 | 77 | 33 | 5690 | 224 |
| 295 | 218 | 241 | 282 | 99 | 77 | 33 | 5690 | 224 |
| 268 | 216 | 262 | 249 | 99 | 77 | 33 | 5690 | 224 |
| 176 | 104 | 169 | 112 | 99 | 77 | 33 | 5690 | 224 |
| 246 | 139 | 215 | 180 | 99 | 77 | 33 | 5690 | 224 |
| 183 | 111 | 176 | 122 | 99 | 77 | 33 | 5690 | 224 |
| 221 | 124 | 206 | 169 | 99 | 77 | 33 | 5690 | 224 |
| 181 | 105 | 167 | 138 | 99 | 77 | 33 | 5690 | 224 |
| 208 | 135 | 208 | 165 | 99 | 77 | 33 | 5690 | 224 |
| 194 | 94  | 194 | 120 | 99 | 77 | 33 | 5690 | 224 |
| 230 | 141 | 230 | 164 | 99 | 77 | 33 | 5690 | 224 |
| 231 | 153 | 231 | 174 | 99 | 77 | 33 | 5690 | 224 |
| 230 | 142 | 230 | 168 | 99 | 77 | 33 | 5690 | 224 |
| 237 | 153 | 237 | 175 | 99 | 77 | 33 | 5690 | 224 |
| 246 | 157 | 246 | 180 | 99 | 77 | 33 | 5690 | 224 |
| 226 | 151 | 226 | 158 | 99 | 77 | 33 | 5690 | 224 |
| 210 | 125 | 210 | 142 | 99 | 77 | 33 | 5690 | 224 |
| 248 | 183 | 248 | 192 | 99 | 77 | 33 | 5690 | 224 |
| 189 | 105 | 189 | 119 | 99 | 77 | 33 | 5690 | 224 |
| 185 | 104 | 185 | 117 | 99 | 77 | 33 | 5690 | 224 |
| 325 | 246 | 302 | 316 | 99 | 77 | 33 | 5690 | 224 |
| 266 | 196 | 266 | 255 | 99 | 77 | 33 | 5690 | 224 |
| 228 | 159 | 228 | 184 | 99 | 77 | 33 | 5690 | 224 |
| 228 | 159 | 228 | 184 | 99 | 77 | 33 | 5690 | 224 |
| 225 | 161 | 225 | 192 | 99 | 77 | 33 | 5690 | 224 |
| 340 | 254 | 275 | 326 | 99 | 77 | 33 | 5690 | 224 |
| 259 | 202 | 246 | 247 | 99 | 77 | 33 | 5690 | 224 |
| 259 | 202 | 254 | 248 | 99 | 77 | 33 | 5690 | 224 |
| 257 | 202 | 255 | 246 | 99 | 77 | 33 | 5690 | 224 |
| 257 | 202 | 255 | 246 | 99 | 77 | 33 | 5690 | 224 |
| 232 | 163 | 232 | 193 | 99 | 77 | 33 | 5690 | 224 |
| 237 | 163 | 237 | 191 | 99 | 77 | 33 | 5690 | 224 |
| 222 | 176 | 219 | 209 | 99 | 77 | 33 | 5690 | 224 |
| 193 | 134 | 193 | 156 | 99 | 77 | 33 | 5690 | 224 |
| 250 | 187 | 247 | 220 | 99 | 77 | 33 | 5690 | 224 |
| 199 | 130 | 199 | 139 | 99 | 77 | 33 | 5690 | 224 |
| 199 | 130 | 199 | 139 | 99 | 77 | 33 | 5690 | 224 |
| 219 | 143 | 219 | 157 | 99 | 77 | 33 | 5690 | 224 |
| 219 | 143 | 219 | 157 | 99 | 77 | 33 | 5690 | 224 |

|     |     |     |     |    |    |    |      |     |
|-----|-----|-----|-----|----|----|----|------|-----|
| 219 | 143 | 219 | 157 | 99 | 77 | 33 | 5690 | 224 |
| 224 | 152 | 224 | 167 | 99 | 77 | 33 | 5690 | 224 |
| 241 | 159 | 241 | 183 | 99 | 77 | 33 | 5690 | 224 |
| 232 | 164 | 232 | 185 | 99 | 77 | 33 | 5690 | 224 |
| 201 | 131 | 201 | 143 | 99 | 77 | 33 | 5690 | 224 |
| 234 | 161 | 234 | 172 | 99 | 77 | 33 | 5690 | 224 |
| 239 | 128 | 239 | 136 | 99 | 77 | 33 | 5690 | 224 |
| 234 | 121 | 234 | 128 | 99 | 77 | 33 | 5690 | 224 |
|     |     |     |     | 99 | 77 | 33 | 5690 | 224 |
| 248 | 185 | 241 | 238 | 99 | 77 | 33 | 5690 | 224 |
| 233 | 151 | 233 | 170 | 99 | 77 | 33 | 5690 | 224 |
| 238 | 179 | 236 | 229 | 99 | 77 | 33 | 5690 | 224 |
| 201 | 134 | 201 | 159 | 99 | 77 | 33 | 5690 | 224 |
| 220 | 153 | 220 | 180 | 99 | 77 | 33 | 5690 | 224 |
| 220 | 153 | 220 | 180 | 99 | 77 | 33 | 5690 | 224 |
| 209 | 147 | 209 | 176 | 99 | 77 | 33 | 5690 | 224 |
| 300 | 198 | 300 | 206 | 99 | 77 | 33 | 5690 | 224 |
| 316 | 169 | 316 | 180 | 99 | 77 | 33 | 5690 | 224 |
| 265 | 145 | 265 | 155 | 99 | 77 | 33 | 5690 | 224 |
| 323 | 175 | 323 | 186 | 99 | 77 | 33 | 5690 | 224 |
| 216 | 138 | 216 | 150 | 99 | 77 | 33 | 5690 | 224 |
| 359 | 173 | 359 | 180 | 99 | 77 | 33 | 5690 | 224 |
| 241 | 125 | 241 | 145 | 99 | 77 | 33 | 5690 | 224 |
| 293 | 173 | 293 | 214 | 99 | 77 | 33 | 5690 | 224 |
| 331 | 181 | 331 | 186 | 99 | 77 | 33 | 5690 | 224 |
| 399 | 183 | 399 | 187 | 99 | 77 | 33 | 5690 | 224 |
| 254 | 139 | 254 | 158 | 99 | 77 | 33 | 5690 | 224 |
| 340 | 189 | 340 | 206 | 99 | 77 | 33 | 5690 | 224 |
| 369 | 152 | 369 | 162 | 99 | 77 | 33 | 5690 | 224 |
| 287 | 97  | 287 | 102 | 99 | 77 | 33 | 5690 | 224 |
| 308 | 113 | 308 | 123 | 99 | 77 | 33 | 5690 | 224 |
| 243 | 77  | 243 | 81  | 99 | 77 | 33 | 5690 | 224 |
| 222 | 88  | 222 | 95  | 99 | 77 | 33 | 5690 | 224 |
| 267 | 112 | 267 | 126 | 99 | 77 | 33 | 5690 | 224 |
| 275 | 112 | 275 | 121 | 99 | 77 | 33 | 5690 | 224 |
| 274 | 126 | 274 | 138 | 99 | 77 | 33 | 5690 | 224 |
| 259 | 130 | 259 | 147 | 99 | 77 | 33 | 5690 | 224 |
| 276 | 124 | 276 | 133 | 99 | 77 | 33 | 5690 | 224 |
| 253 | 104 | 253 | 113 | 99 | 77 | 33 | 5690 | 224 |
| 311 | 121 | 307 | 124 | 99 | 77 | 33 | 5690 | 224 |
| 286 | 124 | 286 | 136 | 99 | 77 | 33 | 5690 | 224 |
| 389 | 236 | 375 | 249 | 99 | 77 | 33 | 5690 | 224 |
| 408 | 258 | 344 | 286 | 99 | 77 | 33 | 5690 | 224 |
| 335 | 161 | 335 | 181 | 99 | 77 | 33 | 5690 | 224 |
| 338 | 160 | 334 | 169 | 99 | 77 | 33 | 5690 | 224 |
| 302 | 129 | 298 | 143 | 99 | 77 | 33 | 5690 | 224 |
| 222 | 108 | 210 | 125 | 99 | 77 | 33 | 5690 | 224 |
| 321 | 137 | 307 | 144 | 99 | 77 | 33 | 5690 | 224 |
| 260 | 86  | 253 | 92  | 99 | 77 | 33 | 5690 | 224 |
| 249 | 81  | 240 | 81  | 99 | 77 | 33 | 5690 | 224 |

|     |     |     |     |    |    |    |      |     |
|-----|-----|-----|-----|----|----|----|------|-----|
| 238 | 131 | 207 | 137 | 99 | 77 | 33 | 5690 | 224 |
| 271 | 108 | 271 | 119 | 99 | 77 | 33 | 5690 | 224 |
| 292 | 184 | 184 | 274 | 97 | 82 | 36 | 5175 | 221 |
| 184 | 122 | 122 | 166 | 97 | 82 | 36 | 5175 | 221 |
| 237 | 163 | 163 | 215 | 97 | 82 | 36 | 5175 | 221 |
| 241 | 152 | 230 | 165 | 97 | 82 | 36 | 5175 | 221 |
| 237 | 186 | 234 | 234 | 97 | 82 | 36 | 5175 | 221 |
| 278 | 234 | 234 | 238 | 97 | 82 | 36 | 5175 | 221 |
| 176 | 104 | 169 | 112 | 97 | 82 | 36 | 5175 | 221 |
| 246 | 139 | 215 | 180 | 97 | 82 | 36 | 5175 | 221 |
| 183 | 111 | 176 | 122 | 97 | 82 | 36 | 5175 | 221 |
| 230 | 141 | 230 | 164 | 97 | 82 | 36 | 5175 | 221 |
| 231 | 153 | 231 | 174 | 97 | 82 | 36 | 5175 | 221 |
| 246 | 157 | 246 | 180 | 97 | 82 | 36 | 5175 | 221 |
| 210 | 125 | 210 | 142 | 97 | 82 | 36 | 5175 | 221 |
| 248 | 183 | 248 | 192 | 97 | 82 | 36 | 5175 | 221 |
| 189 | 105 | 189 | 119 | 97 | 82 | 36 | 5175 | 221 |
| 222 | 176 | 219 | 209 | 97 | 82 | 36 | 5175 | 221 |
| 193 | 134 | 193 | 156 | 97 | 82 | 36 | 5175 | 221 |
| 199 | 130 | 199 | 139 | 97 | 82 | 36 | 5175 | 221 |
| 199 | 130 | 199 | 139 | 97 | 82 | 36 | 5175 | 221 |
| 219 | 143 | 219 | 157 | 97 | 82 | 36 | 5175 | 221 |
| 224 | 152 | 224 | 167 | 97 | 82 | 36 | 5175 | 221 |
| 232 | 164 | 232 | 185 | 97 | 82 | 36 | 5175 | 221 |
| 201 | 131 | 201 | 143 | 97 | 82 | 36 | 5175 | 221 |
| 234 | 161 | 234 | 172 | 97 | 82 | 36 | 5175 | 221 |
| 239 | 128 | 239 | 136 | 97 | 82 | 36 | 5175 | 221 |
| 234 | 121 | 234 | 128 | 97 | 82 | 36 | 5175 | 221 |
| 248 | 185 | 241 | 238 | 97 | 82 | 36 | 5175 | 221 |
| 233 | 151 | 233 | 170 | 97 | 82 | 36 | 5175 | 221 |
| 238 | 179 | 236 | 229 | 97 | 82 | 36 | 5175 | 221 |
| 201 | 134 | 201 | 159 | 97 | 82 | 36 | 5175 | 221 |
| 220 | 153 | 220 | 180 | 97 | 82 | 36 | 5175 | 221 |
| 209 | 147 | 209 | 176 | 97 | 82 | 36 | 5175 | 221 |
| 300 | 198 | 300 | 206 | 97 | 82 | 36 | 5175 | 221 |
| 265 | 145 | 265 | 155 | 97 | 82 | 36 | 5175 | 221 |
| 323 | 175 | 323 | 186 | 97 | 82 | 36 | 5175 | 221 |
| 216 | 138 | 216 | 150 | 97 | 82 | 36 | 5175 | 221 |
| 359 | 173 | 359 | 180 | 97 | 82 | 36 | 5175 | 221 |
| 241 | 125 | 241 | 145 | 97 | 82 | 36 | 5175 | 221 |
| 293 | 173 | 293 | 214 | 97 | 82 | 36 | 5175 | 221 |
| 331 | 181 | 331 | 186 | 97 | 82 | 36 | 5175 | 221 |
| 254 | 139 | 254 | 158 | 97 | 82 | 36 | 5175 | 221 |
| 340 | 189 | 340 | 206 | 97 | 82 | 36 | 5175 | 221 |
| 292 | 120 | 292 | 131 | 97 | 82 | 36 | 5175 | 221 |
| 267 | 112 | 267 | 126 | 97 | 82 | 36 | 5175 | 221 |
| 276 | 124 | 276 | 133 | 97 | 82 | 36 | 5175 | 221 |
| 253 | 104 | 253 | 113 | 97 | 82 | 36 | 5175 | 221 |
| 311 | 121 | 307 | 124 | 97 | 82 | 36 | 5175 | 221 |
| 222 | 108 | 210 | 125 | 97 | 82 | 36 | 5175 | 221 |

|     |     |     |     |    |    |    |      |     |
|-----|-----|-----|-----|----|----|----|------|-----|
| 292 | 184 | 184 | 274 | 76 | 83 | 27 | 7753 | 229 |
| 239 | 183 | 205 | 189 | 76 | 83 | 27 | 7753 | 229 |
| 180 | 143 | 168 | 161 | 76 | 83 | 27 | 7753 | 229 |
| 241 | 152 | 230 | 165 | 76 | 83 | 27 | 7753 | 229 |
| 237 | 186 | 234 | 234 | 76 | 83 | 27 | 7753 | 229 |
| 176 | 104 | 169 | 112 | 76 | 83 | 27 | 7753 | 229 |
| 246 | 139 | 215 | 180 | 76 | 83 | 27 | 7753 | 229 |
| 183 | 111 | 176 | 122 | 76 | 83 | 27 | 7753 | 229 |
| 232 | 143 | 232 | 169 | 76 | 83 | 27 | 7753 | 229 |
| 230 | 141 | 230 | 164 | 76 | 83 | 27 | 7753 | 229 |
| 231 | 153 | 231 | 174 | 76 | 83 | 27 | 7753 | 229 |
| 230 | 142 | 230 | 168 | 76 | 83 | 27 | 7753 | 229 |
| 246 | 157 | 246 | 180 | 76 | 83 | 27 | 7753 | 229 |
| 210 | 125 | 210 | 142 | 76 | 83 | 27 | 7753 | 229 |
| 248 | 183 | 248 | 192 | 76 | 83 | 27 | 7753 | 229 |
| 222 | 176 | 219 | 209 | 76 | 83 | 27 | 7753 | 229 |
| 193 | 134 | 193 | 156 | 76 | 83 | 27 | 7753 | 229 |
| 199 | 130 | 199 | 139 | 76 | 83 | 27 | 7753 | 229 |
| 199 | 130 | 199 | 139 | 76 | 83 | 27 | 7753 | 229 |
| 219 | 143 | 219 | 157 | 76 | 83 | 27 | 7753 | 229 |
| 224 | 152 | 224 | 167 | 76 | 83 | 27 | 7753 | 229 |
| 232 | 164 | 232 | 185 | 76 | 83 | 27 | 7753 | 229 |
| 201 | 131 | 201 | 143 | 76 | 83 | 27 | 7753 | 229 |
| 234 | 161 | 234 | 172 | 76 | 83 | 27 | 7753 | 229 |
| 239 | 128 | 239 | 136 | 76 | 83 | 27 | 7753 | 229 |
| 234 | 121 | 234 | 128 | 76 | 83 | 27 | 7753 | 229 |
| 248 | 185 | 241 | 238 | 76 | 83 | 27 | 7753 | 229 |
| 233 | 151 | 233 | 170 | 76 | 83 | 27 | 7753 | 229 |
| 238 | 179 | 236 | 229 | 76 | 83 | 27 | 7753 | 229 |
| 201 | 134 | 201 | 159 | 76 | 83 | 27 | 7753 | 229 |
| 220 | 153 | 220 | 180 | 76 | 83 | 27 | 7753 | 229 |
| 209 | 147 | 209 | 176 | 76 | 83 | 27 | 7753 | 229 |
| 300 | 198 | 300 | 206 | 76 | 83 | 27 | 7753 | 229 |
| 265 | 145 | 265 | 155 | 76 | 83 | 27 | 7753 | 229 |
| 323 | 175 | 323 | 186 | 76 | 83 | 27 | 7753 | 229 |
| 359 | 173 | 359 | 180 | 76 | 83 | 27 | 7753 | 229 |
| 241 | 125 | 241 | 145 | 76 | 83 | 27 | 7753 | 229 |
| 293 | 173 | 293 | 214 | 76 | 83 | 27 | 7753 | 229 |
| 331 | 181 | 331 | 186 | 76 | 83 | 27 | 7753 | 229 |
| 254 | 139 | 254 | 158 | 76 | 83 | 27 | 7753 | 229 |
| 340 | 189 | 340 | 206 | 76 | 83 | 27 | 7753 | 229 |
| 369 | 152 | 369 | 162 | 76 | 83 | 27 | 7753 | 229 |
| 267 | 112 | 267 | 126 | 76 | 83 | 27 | 7753 | 229 |
| 275 | 112 | 275 | 121 | 76 | 83 | 27 | 7753 | 229 |
| 276 | 124 | 276 | 133 | 76 | 83 | 27 | 7753 | 229 |
| 253 | 104 | 253 | 113 | 76 | 83 | 27 | 7753 | 229 |
| 311 | 121 | 307 | 124 | 76 | 83 | 27 | 7753 | 229 |
| 286 | 124 | 286 | 136 | 76 | 83 | 27 | 7753 | 229 |
| 271 | 108 | 271 | 119 | 76 | 83 | 27 | 7753 | 229 |
| 256 | 166 | 241 | 180 | 50 | 79 | 28 | 6974 | 201 |

|     |     |     |     |    |    |    |      |     |
|-----|-----|-----|-----|----|----|----|------|-----|
| 223 | 183 | 195 | 204 | 50 | 79 | 28 | 6974 | 201 |
| 217 | 143 | 217 | 182 | 50 | 79 | 28 | 6974 | 201 |
| 183 | 111 | 176 | 122 | 50 | 79 | 28 | 6974 | 201 |
| 181 | 105 | 167 | 138 | 50 | 79 | 28 | 6974 | 201 |
| 230 | 141 | 230 | 164 | 50 | 79 | 28 | 6974 | 201 |
| 231 | 153 | 231 | 174 | 50 | 79 | 28 | 6974 | 201 |
| 230 | 142 | 230 | 168 | 50 | 79 | 28 | 6974 | 201 |
| 237 | 153 | 237 | 175 | 50 | 79 | 28 | 6974 | 201 |
| 246 | 157 | 246 | 180 | 50 | 79 | 28 | 6974 | 201 |
| 210 | 125 | 210 | 142 | 50 | 79 | 28 | 6974 | 201 |
| 248 | 183 | 248 | 192 | 50 | 79 | 28 | 6974 | 201 |
| 228 | 159 | 228 | 184 | 50 | 79 | 28 | 6974 | 201 |
| 222 | 176 | 219 | 209 | 50 | 79 | 28 | 6974 | 201 |
| 193 | 134 | 193 | 156 | 50 | 79 | 28 | 6974 | 201 |
| 199 | 130 | 199 | 139 | 50 | 79 | 28 | 6974 | 201 |
| 199 | 130 | 199 | 139 | 50 | 79 | 28 | 6974 | 201 |
| 219 | 143 | 219 | 157 | 50 | 79 | 28 | 6974 | 201 |
| 201 | 131 | 201 | 143 | 50 | 79 | 28 | 6974 | 201 |
| 234 | 161 | 234 | 172 | 50 | 79 | 28 | 6974 | 201 |
| 248 | 185 | 241 | 238 | 50 | 79 | 28 | 6974 | 201 |
| 233 | 151 | 233 | 170 | 50 | 79 | 28 | 6974 | 201 |
| 201 | 134 | 201 | 159 | 50 | 79 | 28 | 6974 | 201 |
| 220 | 153 | 220 | 180 | 50 | 79 | 28 | 6974 | 201 |
| 209 | 147 | 209 | 176 | 50 | 79 | 28 | 6974 | 201 |
| 300 | 198 | 300 | 206 | 50 | 79 | 28 | 6974 | 201 |
| 323 | 175 | 323 | 186 | 50 | 79 | 28 | 6974 | 201 |
| 293 | 173 | 293 | 214 | 50 | 79 | 28 | 6974 | 201 |
| 276 | 124 | 276 | 133 | 50 | 79 | 28 | 6974 | 201 |
| 253 | 104 | 253 | 113 | 50 | 79 | 28 | 6974 | 201 |
| 286 | 124 | 286 | 136 | 50 | 79 | 28 | 6974 | 201 |
| 408 | 258 | 344 | 286 | 50 | 79 | 28 | 6974 | 201 |
| 335 | 161 | 335 | 181 | 50 | 79 | 28 | 6974 | 201 |
| 302 | 129 | 298 | 143 | 50 | 79 | 28 | 6974 | 201 |
| 260 | 86  | 253 | 92  | 50 | 79 | 28 | 6974 | 201 |
| 256 | 166 | 241 | 180 | 67 | 96 | 31 | 7480 | 220 |
| 217 | 143 | 217 | 182 | 67 | 96 | 31 | 7480 | 220 |
| 268 | 216 | 262 | 249 | 67 | 96 | 31 | 7480 | 220 |
| 183 | 111 | 176 | 122 | 67 | 96 | 31 | 7480 | 220 |
| 181 | 105 | 167 | 138 | 67 | 96 | 31 | 7480 | 220 |
| 230 | 141 | 230 | 164 | 67 | 96 | 31 | 7480 | 220 |
| 246 | 157 | 246 | 180 | 67 | 96 | 31 | 7480 | 220 |
| 248 | 183 | 248 | 192 | 67 | 96 | 31 | 7480 | 220 |
| 228 | 159 | 228 | 184 | 67 | 96 | 31 | 7480 | 220 |
| 222 | 176 | 219 | 209 | 67 | 96 | 31 | 7480 | 220 |
| 199 | 130 | 199 | 139 | 67 | 96 | 31 | 7480 | 220 |
| 219 | 143 | 219 | 157 | 67 | 96 | 31 | 7480 | 220 |
| 201 | 131 | 201 | 143 | 67 | 96 | 31 | 7480 | 220 |
| 234 | 161 | 234 | 172 | 67 | 96 | 31 | 7480 | 220 |
| 248 | 185 | 241 | 238 | 67 | 96 | 31 | 7480 | 220 |
| 220 | 153 | 220 | 180 | 67 | 96 | 31 | 7480 | 220 |



|     |     |     |     |    |    |    |      |     |
|-----|-----|-----|-----|----|----|----|------|-----|
| 209 | 147 | 209 | 176 | 67 | 96 | 31 | 7480 | 220 |
| 300 | 198 | 300 | 206 | 67 | 96 | 31 | 7480 | 220 |
| 323 | 175 | 323 | 186 | 67 | 96 | 31 | 7480 | 220 |
| 293 | 173 | 293 | 214 | 67 | 96 | 31 | 7480 | 220 |
| 276 | 124 | 276 | 133 | 67 | 96 | 31 | 7480 | 220 |
| 253 | 104 | 253 | 113 | 67 | 96 | 31 | 7480 | 220 |
| 286 | 124 | 286 | 136 | 67 | 96 | 31 | 7480 | 220 |
| 408 | 258 | 344 | 286 | 67 | 96 | 31 | 7480 | 220 |
| 302 | 129 | 298 | 143 | 67 | 96 | 31 | 7480 | 220 |
| 260 | 86  | 253 | 92  | 67 | 96 | 31 | 7480 | 220 |
| 204 | 155 | 157 | 191 | 80 | 65 | 28 | 5948 | 205 |
| 209 | 144 | 150 | 183 | 80 | 65 | 28 | 5948 | 205 |
| 292 | 184 | 184 | 274 | 80 | 65 | 28 | 5948 | 205 |
| 214 | 178 | 185 | 199 | 80 | 65 | 28 | 5948 | 205 |
| 300 | 251 | 277 | 286 | 80 | 65 | 28 | 5948 | 205 |
| 214 | 159 | 159 | 192 | 80 | 65 | 28 | 5948 | 205 |
| 252 | 184 | 236 | 224 | 80 | 65 | 28 | 5948 | 205 |
| 220 | 179 | 209 | 200 | 80 | 65 | 28 | 5948 | 205 |
| 225 | 159 | 225 | 188 | 80 | 65 | 28 | 5948 | 205 |
| 228 | 155 | 225 | 197 | 80 | 65 | 28 | 5948 | 205 |
| 166 | 99  | 125 | 145 | 80 | 65 | 28 | 5948 | 205 |
| 274 | 183 | 222 | 250 | 80 | 65 | 28 | 5948 | 205 |
| 208 | 147 | 171 | 184 | 80 | 65 | 28 | 5948 | 205 |
| 338 | 198 | 236 | 295 | 80 | 65 | 28 | 5948 | 205 |
| 246 | 139 | 215 | 180 | 80 | 65 | 28 | 5948 | 205 |
| 180 | 107 | 173 | 117 | 80 | 65 | 28 | 5948 | 205 |
| 192 | 113 | 182 | 149 | 80 | 65 | 28 | 5948 | 205 |
| 185 | 107 | 171 | 140 | 80 | 65 | 28 | 5948 | 205 |
| 245 | 125 | 207 | 162 | 80 | 65 | 28 | 5948 | 205 |
| 206 | 129 | 206 | 153 | 80 | 65 | 28 | 5948 | 205 |
| 259 | 202 | 257 | 248 | 80 | 65 | 28 | 5948 | 205 |
| 232 | 160 | 232 | 177 | 80 | 65 | 28 | 5948 | 205 |
| 185 | 109 | 185 | 118 | 80 | 65 | 28 | 5948 | 205 |
| 307 | 166 | 307 | 176 | 80 | 65 | 28 | 5948 | 205 |
| 218 | 140 | 218 | 152 | 80 | 65 | 28 | 5948 | 205 |
| 295 | 184 | 295 | 192 | 80 | 65 | 28 | 5948 | 205 |
| 533 | 295 | 533 | 331 | 80 | 65 | 28 | 5948 | 205 |
| 441 | 203 | 441 | 208 | 80 | 65 | 28 | 5948 | 205 |
| 371 | 230 | 339 | 252 | 80 | 65 | 28 | 5948 | 205 |
| 219 | 95  | 219 | 118 | 80 | 65 | 28 | 5948 | 205 |
| 350 | 131 | 350 | 138 | 80 | 65 | 28 | 5948 | 205 |
| 246 | 157 | 246 | 180 | 80 | 65 | 28 | 5948 | 205 |
| 285 | 165 | 285 | 200 | 80 | 65 | 28 | 5948 | 205 |
| 275 | 136 | 275 | 144 | 80 | 65 | 28 | 5948 | 205 |
| 309 | 129 | 309 | 143 | 80 | 65 | 28 | 5948 | 205 |
| 271 | 163 | 271 | 173 | 80 | 65 | 28 | 5948 | 205 |
| 375 | 223 | 375 | 262 | 80 | 65 | 28 | 5948 | 205 |
| 233 | 125 | 229 | 139 | 80 | 65 | 28 | 5948 | 205 |
| 405 | 261 | 348 | 285 | 80 | 65 | 28 | 5948 | 205 |
| 244 | 94  | 241 | 103 | 80 | 65 | 28 | 5948 | 205 |

|     |     |     |     |     |    |    |      |     |
|-----|-----|-----|-----|-----|----|----|------|-----|
| 298 | 126 | 298 | 138 | 80  | 65 | 28 | 5948 | 205 |
| 218 | 86  | 218 | 86  | 80  | 65 | 28 | 5948 | 205 |
| 219 | 95  | 219 | 118 | 80  | 65 | 28 | 5948 | 205 |
| 273 | 104 | 273 | 112 | 80  | 65 | 28 | 5948 | 205 |
| 191 | 112 | 191 | 131 | 80  | 65 | 28 | 5948 | 205 |
| 300 | 251 | 277 | 286 | 85  | 67 | 27 | 6307 | 213 |
| 214 | 159 | 159 | 192 | 85  | 67 | 27 | 6307 | 213 |
| 220 | 179 | 209 | 200 | 85  | 67 | 27 | 6307 | 213 |
| 225 | 159 | 225 | 188 | 85  | 67 | 27 | 6307 | 213 |
| 274 | 183 | 222 | 250 | 85  | 67 | 27 | 6307 | 213 |
| 246 | 139 | 215 | 180 | 85  | 67 | 27 | 6307 | 213 |
| 192 | 113 | 182 | 149 | 85  | 67 | 27 | 6307 | 213 |
| 206 | 129 | 206 | 153 | 85  | 67 | 27 | 6307 | 213 |
| 307 | 166 | 307 | 176 | 85  | 67 | 27 | 6307 | 213 |
| 533 | 295 | 533 | 331 | 85  | 67 | 27 | 6307 | 213 |
| 218 | 86  | 218 | 86  | 85  | 67 | 27 | 6307 | 213 |
| 275 | 136 | 275 | 144 | 85  | 67 | 27 | 6307 | 213 |
| 375 | 223 | 375 | 262 | 85  | 67 | 27 | 6307 | 213 |
| 405 | 261 | 348 | 285 | 85  | 67 | 27 | 6307 | 213 |
| 298 | 126 | 298 | 138 | 85  | 67 | 27 | 6307 | 213 |
| 219 | 95  | 219 | 118 | 85  | 67 | 27 | 6307 | 213 |
| 191 | 112 | 191 | 131 | 85  | 67 | 27 | 6307 | 213 |
| 204 | 155 | 157 | 191 | 81  | 87 | 34 | 6022 | 220 |
| 209 | 144 | 150 | 183 | 81  | 87 | 34 | 6022 | 220 |
| 292 | 184 | 184 | 274 | 81  | 87 | 34 | 6022 | 220 |
| 214 | 178 | 185 | 199 | 81  | 87 | 34 | 6022 | 220 |
| 242 | 152 | 175 | 223 | 81  | 87 | 34 | 6022 | 220 |
| 300 | 251 | 277 | 286 | 81  | 87 | 34 | 6022 | 220 |
| 270 | 159 | 163 | 240 | 81  | 87 | 34 | 6022 | 220 |
| 338 | 198 | 236 | 295 | 81  | 87 | 34 | 6022 | 220 |
| 192 | 113 | 182 | 149 | 81  | 87 | 34 | 6022 | 220 |
| 245 | 125 | 207 | 162 | 81  | 87 | 34 | 6022 | 220 |
| 206 | 129 | 206 | 153 | 81  | 87 | 34 | 6022 | 220 |
| 185 | 109 | 185 | 118 | 81  | 87 | 34 | 6022 | 220 |
| 307 | 166 | 307 | 176 | 81  | 87 | 34 | 6022 | 220 |
| 441 | 203 | 441 | 208 | 81  | 87 | 34 | 6022 | 220 |
| 371 | 230 | 339 | 252 | 81  | 87 | 34 | 6022 | 220 |
| 219 | 95  | 219 | 118 | 81  | 87 | 34 | 6022 | 220 |
| 298 | 126 | 298 | 138 | 81  | 87 | 34 | 6022 | 220 |
| 309 | 129 | 309 | 143 | 81  | 87 | 34 | 6022 | 220 |
| 375 | 223 | 375 | 262 | 81  | 87 | 34 | 6022 | 220 |
| 298 | 100 | 298 | 105 | 81  | 87 | 34 | 6022 | 220 |
| 204 | 155 | 157 | 191 | 102 | 89 | 30 | 6999 | 258 |
| 209 | 144 | 150 | 183 | 102 | 89 | 30 | 6999 | 258 |
| 242 | 152 | 175 | 223 | 102 | 89 | 30 | 6999 | 258 |
| 300 | 251 | 277 | 286 | 102 | 89 | 30 | 6999 | 258 |
| 214 | 159 | 159 | 192 | 102 | 89 | 30 | 6999 | 258 |
| 252 | 184 | 236 | 224 | 102 | 89 | 30 | 6999 | 258 |
| 220 | 179 | 209 | 200 | 102 | 89 | 30 | 6999 | 258 |
| 225 | 159 | 225 | 188 | 102 | 89 | 30 | 6999 | 258 |

|     |     |     |     |     |    |    |      |     |
|-----|-----|-----|-----|-----|----|----|------|-----|
| 228 | 155 | 225 | 197 | 102 | 89 | 30 | 6999 | 258 |
| 274 | 183 | 222 | 250 | 102 | 89 | 30 | 6999 | 258 |
| 246 | 139 | 215 | 180 | 102 | 89 | 30 | 6999 | 258 |
| 192 | 113 | 182 | 149 | 102 | 89 | 30 | 6999 | 258 |
| 259 | 202 | 257 | 248 | 102 | 89 | 30 | 6999 | 258 |
| 307 | 166 | 307 | 176 | 102 | 89 | 30 | 6999 | 258 |
| 218 | 140 | 218 | 152 | 102 | 89 | 30 | 6999 | 258 |
| 295 | 184 | 295 | 192 | 102 | 89 | 30 | 6999 | 258 |
| 533 | 295 | 533 | 331 | 102 | 89 | 30 | 6999 | 258 |
| 441 | 203 | 441 | 208 | 102 | 89 | 30 | 6999 | 258 |
| 371 | 230 | 339 | 252 | 102 | 89 | 30 | 6999 | 258 |
| 219 | 95  | 219 | 118 | 102 | 89 | 30 | 6999 | 258 |
| 350 | 131 | 350 | 138 | 102 | 89 | 30 | 6999 | 258 |
| 246 | 157 | 246 | 180 | 102 | 89 | 30 | 6999 | 258 |
| 298 | 126 | 298 | 138 | 102 | 89 | 30 | 6999 | 258 |
| 285 | 165 | 285 | 200 | 102 | 89 | 30 | 6999 | 258 |
| 275 | 136 | 275 | 144 | 102 | 89 | 30 | 6999 | 258 |
| 309 | 129 | 309 | 143 | 102 | 89 | 30 | 6999 | 258 |
| 375 | 223 | 375 | 262 | 102 | 89 | 30 | 6999 | 258 |
| 405 | 261 | 348 | 285 | 102 | 89 | 30 | 6999 | 258 |
| 389 | 236 | 375 | 249 | 102 | 89 | 30 | 6999 | 258 |
| 412 | 262 | 342 | 291 | 102 | 89 | 30 | 6999 | 258 |
| 298 | 126 | 298 | 138 | 102 | 89 | 30 | 6999 | 258 |
| 218 | 86  | 218 | 86  | 102 | 89 | 30 | 6999 | 258 |
| 298 | 100 | 298 | 105 | 102 | 89 | 30 | 6999 | 258 |
| 219 | 95  | 219 | 118 | 102 | 89 | 30 | 6999 | 258 |
| 359 | 132 | 359 | 139 | 102 | 89 | 30 | 6999 | 258 |
| 276 | 151 | 151 | 205 | 102 | 89 | 30 | 6999 | 258 |
| 226 | 114 | 226 | 127 | 102 | 89 | 30 | 6999 | 258 |
| 209 | 144 | 150 | 183 | 100 | 85 | 32 | 6379 | 246 |
| 214 | 178 | 185 | 199 | 100 | 85 | 32 | 6379 | 246 |
| 300 | 251 | 277 | 286 | 100 | 85 | 32 | 6379 | 246 |
| 220 | 179 | 209 | 200 | 100 | 85 | 32 | 6379 | 246 |
| 225 | 159 | 225 | 188 | 100 | 85 | 32 | 6379 | 246 |
| 166 | 99  | 125 | 145 | 100 | 85 | 32 | 6379 | 246 |
| 274 | 183 | 222 | 250 | 100 | 85 | 32 | 6379 | 246 |
| 246 | 139 | 215 | 180 | 100 | 85 | 32 | 6379 | 246 |
| 192 | 113 | 182 | 149 | 100 | 85 | 32 | 6379 | 246 |
| 206 | 129 | 206 | 153 | 100 | 85 | 32 | 6379 | 246 |
| 307 | 166 | 307 | 176 | 100 | 85 | 32 | 6379 | 246 |
| 295 | 184 | 295 | 192 | 100 | 85 | 32 | 6379 | 246 |
| 533 | 295 | 533 | 331 | 100 | 85 | 32 | 6379 | 246 |
| 275 | 136 | 275 | 144 | 100 | 85 | 32 | 6379 | 246 |
| 375 | 223 | 375 | 262 | 100 | 85 | 32 | 6379 | 246 |
| 233 | 125 | 229 | 139 | 100 | 85 | 32 | 6379 | 246 |
| 405 | 261 | 348 | 285 | 100 | 85 | 32 | 6379 | 246 |
| 298 | 126 | 298 | 138 | 100 | 85 | 32 | 6379 | 246 |
| 218 | 86  | 218 | 86  | 100 | 85 | 32 | 6379 | 246 |
| 219 | 95  | 219 | 118 | 100 | 85 | 32 | 6379 | 246 |
| 242 | 152 | 175 | 223 | 88  | 80 | 31 | 6623 | 231 |

|     |     |     |     |    |    |    |      |     |
|-----|-----|-----|-----|----|----|----|------|-----|
| 300 | 251 | 277 | 286 | 88 | 80 | 31 | 6623 | 231 |
| 220 | 179 | 209 | 200 | 88 | 80 | 31 | 6623 | 231 |
| 274 | 183 | 222 | 250 | 88 | 80 | 31 | 6623 | 231 |
| 270 | 159 | 163 | 240 | 88 | 80 | 31 | 6623 | 231 |
| 192 | 113 | 182 | 149 | 88 | 80 | 31 | 6623 | 231 |
| 245 | 125 | 207 | 162 | 88 | 80 | 31 | 6623 | 231 |
| 185 | 109 | 185 | 118 | 88 | 80 | 31 | 6623 | 231 |
| 307 | 166 | 307 | 176 | 88 | 80 | 31 | 6623 | 231 |
| 219 | 95  | 219 | 118 | 88 | 80 | 31 | 6623 | 231 |
| 309 | 129 | 309 | 143 | 88 | 80 | 31 | 6623 | 231 |
| 375 | 223 | 375 | 262 | 88 | 80 | 31 | 6623 | 231 |
| 298 | 100 | 298 | 105 | 88 | 80 | 31 | 6623 | 231 |
| 242 | 152 | 175 | 223 | 82 | 75 | 32 | 5770 | 210 |
| 242 | 152 | 228 | 165 | 82 | 75 | 32 | 5770 | 210 |
| 239 | 183 | 205 | 189 | 82 | 75 | 32 | 5770 | 210 |
| 233 | 181 | 218 | 212 | 82 | 75 | 32 | 5770 | 210 |
| 220 | 179 | 209 | 200 | 82 | 75 | 32 | 5770 | 210 |
| 225 | 159 | 225 | 188 | 82 | 75 | 32 | 5770 | 210 |
| 228 | 155 | 225 | 197 | 82 | 75 | 32 | 5770 | 210 |
| 208 | 147 | 171 | 184 | 82 | 75 | 32 | 5770 | 210 |
| 192 | 113 | 182 | 149 | 82 | 75 | 32 | 5770 | 210 |
| 245 | 125 | 207 | 162 | 82 | 75 | 32 | 5770 | 210 |
| 259 | 202 | 257 | 248 | 82 | 75 | 32 | 5770 | 210 |
| 232 | 160 | 232 | 177 | 82 | 75 | 32 | 5770 | 210 |
| 214 | 165 | 210 | 191 | 82 | 75 | 32 | 5770 | 210 |
| 307 | 166 | 307 | 176 | 82 | 75 | 32 | 5770 | 210 |
| 219 | 95  | 219 | 118 | 82 | 75 | 32 | 5770 | 210 |
| 226 | 151 | 226 | 158 | 82 | 75 | 32 | 5770 | 210 |
| 298 | 126 | 298 | 138 | 82 | 75 | 32 | 5770 | 210 |
| 342 | 172 | 342 | 179 | 82 | 75 | 32 | 5770 | 210 |
| 280 | 111 | 280 | 115 | 82 | 75 | 32 | 5770 | 210 |
| 233 | 83  | 233 | 83  | 82 | 75 | 32 | 5770 | 210 |
| 298 | 126 | 298 | 138 | 82 | 75 | 32 | 5770 | 210 |
| 273 | 104 | 273 | 112 | 82 | 75 | 32 | 5770 | 210 |
| 239 | 44  | 78  | 194 | 82 | 75 | 32 | 5770 | 210 |
| 195 | 94  | 195 | 109 | 82 | 75 | 32 | 5770 | 210 |

[illegible]

[illegible]

[illegible]

[illegible]



[illegible]

[illegible]

[illegible]

[illegible]

[illegible]

[illegible]

[illegible]

| bio15p | bio16p | bio17p | bio18p | bio19p | bio1ED | bio2ED | bio3ED | bio4ED |
|--------|--------|--------|--------|--------|--------|--------|--------|--------|
| 19     | 221    | 137    | 219    | 174    | 18     | 32     | 11     | -694   |
| 19     | 221    | 137    | 219    | 174    | 23     | 40     | 10     | -182   |
| 19     | 221    | 137    | 219    | 174    | 42     | 23     | 7      | -285   |
| 19     | 221    | 137    | 219    | 174    | 23     | 5      | 6      | -947   |
| 19     | 221    | 137    | 219    | 174    | 26     | 16     | 10     | -1236  |
| 19     | 221    | 137    | 219    | 174    | 22     | 20     | 8      | -410   |
| 19     | 221    | 137    | 219    | 174    | 0      | 32     | 11     | -511   |
| 19     | 221    | 137    | 219    | 174    | 12     | 33     | 11     | -353   |
| 19     | 221    | 137    | 219    | 174    | 14     | 11     | 3      | 100    |
| 19     | 221    | 137    | 219    | 174    | 23     | 36     | 10     | -239   |
| 19     | 221    | 137    | 219    | 174    | 14     | 21     | 6      | -23    |
| 19     | 221    | 137    | 219    | 174    | 5      | 22     | 5      | 292    |
| 19     | 221    | 137    | 219    | 174    | 18     | 30     | 7      | 342    |
| 19     | 221    | 137    | 219    | 174    | 3      | -18    | -6     | -55    |
| 19     | 221    | 137    | 219    | 174    | -1     | -5     | -1     | -190   |
| 19     | 221    | 137    | 219    | 174    | -2     | -14    | -4     | -117   |
| 19     | 221    | 137    | 219    | 174    | -4     | -3     | -2     | 316    |
| 19     | 221    | 137    | 219    | 174    | -3     | -5     | -3     | 292    |
| 19     | 221    | 137    | 219    | 174    | -1     | 1      | 0      | 178    |
| 19     | 221    | 137    | 219    | 174    | 5      | 14     | 3      | 420    |
| 19     | 221    | 137    | 219    | 174    | 1      | 1      | -2     | 415    |
| 19     | 221    | 137    | 219    | 174    | 7      | 14     | 5      | 0      |
| 19     | 221    | 137    | 219    | 174    | 4      | 15     | 5      | 56     |
| 19     | 221    | 137    | 219    | 174    | 4      | 17     | 5      | 159    |
| 19     | 221    | 137    | 219    | 174    | 3      | 16     | 5      | 108    |
| 19     | 221    | 137    | 219    | 174    | -2     | 17     | 5      | 159    |
| 19     | 221    | 137    | 219    | 174    | 3      | 19     | 4      | 501    |
| 19     | 221    | 137    | 219    | 174    | -12    | 9      | 2      | 297    |
| 19     | 221    | 137    | 219    | 174    | 5      | 12     | 1      | 759    |
| 19     | 221    | 137    | 219    | 174    | -7     | 3      | 3      | -308   |
| 19     | 221    | 137    | 219    | 174    | -4     | 5      | 3      | -230   |
| 19     | 221    | 137    | 219    | 174    | 15     | 16     | 5      | -78    |
| 19     | 221    | 137    | 219    | 174    | 15     | 16     | 5      | -78    |
| 19     | 221    | 137    | 219    | 174    | 13     | 12     | 5      | -279   |
| 19     | 221    | 137    | 219    | 174    | -15    | 2      | 1      | -74    |
| 19     | 221    | 137    | 219    | 174    | -2     | 7      | 2      | 65     |
| 19     | 221    | 137    | 219    | 174    | 0      | 6      | 2      | -117   |
| 19     | 221    | 137    | 219    | 174    | 0      | 6      | 2      | -117   |
| 19     | 221    | 137    | 219    | 174    | 7      | 10     | 3      | 67     |
| 19     | 221    | 137    | 219    | 174    | 3      | 11     | 3      | 163    |
| 19     | 221    | 137    | 219    | 174    | 13     | 15     | 4      | 235    |
| 19     | 221    | 137    | 219    | 174    | -5     | 11     | 3      | 251    |
| 19     | 221    | 137    | 219    | 174    | 15     | 22     | 4      | 514    |
| 19     | 221    | 137    | 219    | 174    | 15     | 22     | 4      | 514    |
| 19     | 221    | 137    | 219    | 174    | 2      | 22     | 4      | 528    |
| 19     | 221    | 137    | 219    | 174    | 2      | 22     | 4      | 528    |
| 19     | 221    | 137    | 219    | 174    | 2      | 22     | 4      | 528    |
| 19     | 221    | 137    | 219    | 174    | 0      | 23     | 5      | 561    |
| 19     | 221    | 137    | 219    | 174    | -3     | 17     | 4      | 278    |



|    |     |     |     |     |     |    |    |      |
|----|-----|-----|-----|-----|-----|----|----|------|
| 19 | 221 | 137 | 219 | 174 | -10 | 24 | 6  | 331  |
| 19 | 221 | 137 | 219 | 174 | 6   | 26 | 4  | 765  |
| 19 | 221 | 137 | 219 | 174 | -8  | 16 | 4  | 323  |
| 19 | 221 | 137 | 219 | 174 | -14 | 8  | 0  | 737  |
| 19 | 221 | 137 | 219 | 174 | -6  | 8  | 0  | 786  |
| 19 | 221 | 137 | 219 | 174 | -5  | 16 | 5  | -20  |
| 19 | 221 | 137 | 219 | 174 | 20  | 18 | 6  | -130 |
| 19 | 221 | 137 | 219 | 174 | -3  | 20 | 6  | -50  |
| 19 | 221 | 137 | 219 | 174 | 6   | 18 | 4  | 283  |
| 19 | 221 | 137 | 219 | 174 | 5   | 20 | 5  | 272  |
| 19 | 221 | 137 | 219 | 174 | 5   | 20 | 5  | 272  |
| 19 | 221 | 137 | 219 | 174 | 9   | 13 | 4  | 144  |
| 19 | 221 | 137 | 219 | 174 | 8   | 18 | 4  | 382  |
| 19 | 221 | 137 | 219 | 174 | -5  | 20 | 4  | 453  |
| 19 | 221 | 137 | 219 | 174 | 7   | 22 | 5  | 431  |
| 19 | 221 | 137 | 219 | 174 | 2   | 20 | 3  | 710  |
| 19 | 221 | 137 | 219 | 174 | -9  | 19 | 4  | 435  |
| 19 | 221 | 137 | 219 | 174 | 1   | 24 | 4  | 700  |
| 19 | 221 | 137 | 219 | 174 | -7  | 21 | 4  | 489  |
| 19 | 221 | 137 | 219 | 174 | -11 | 17 | 2  | 972  |
| 19 | 221 | 137 | 219 | 174 | -14 | 16 | 1  | 928  |
| 19 | 221 | 137 | 219 | 174 | -12 | 25 | 3  | 1075 |
| 19 | 221 | 137 | 219 | 174 | 29  | 39 | 5  | 1239 |
| 19 | 221 | 137 | 219 | 174 | -42 | 21 | 3  | 826  |
| 19 | 221 | 137 | 219 | 174 | -22 | 13 | 1  | 723  |
| 19 | 221 | 137 | 219 | 174 | -21 | 25 | 4  | 918  |
| 19 | 221 | 137 | 219 | 174 | -35 | 21 | 1  | 1190 |
| 19 | 221 | 137 | 219 | 174 | -14 | 23 | -1 | 1977 |
| 19 | 221 | 137 | 219 | 174 | 5   | 27 | 0  | 2089 |
| 19 | 221 | 137 | 219 | 174 | -31 | 12 | 1  | 624  |
| 19 | 221 | 137 | 219 | 174 | 0   | 24 | 3  | 972  |
| 19 | 221 | 137 | 219 | 174 | -4  | 17 | -2 | 2258 |
| 19 | 221 | 137 | 219 | 174 | 0   | 29 | 1  | 1887 |
| 19 | 221 | 137 | 219 | 174 | 0   | 34 | 3  | 1522 |
| 19 | 221 | 137 | 219 | 174 | 1   | 25 | 0  | 1918 |
| 19 | 221 | 137 | 219 | 174 | 2   | 27 | 2  | 1322 |
| 19 | 221 | 137 | 219 | 174 | 10  | 31 | 3  | 1440 |
| 19 | 221 | 137 | 219 | 174 | -24 | 29 | 3  | 1231 |
| 19 | 221 | 137 | 219 | 174 | -13 | 24 | 0  | 1952 |
| 19 | 221 | 137 | 219 | 174 | -9  | 18 | 2  | 596  |
| 19 | 221 | 137 | 219 | 174 | 5   | 14 | 1  | 654  |
| 19 | 221 | 137 | 219 | 174 | 14  | 31 | 3  | 1342 |
| 19 | 221 | 137 | 219 | 174 | 64  | 9  | 1  | 353  |
| 19 | 221 | 137 | 219 | 174 | -31 | 25 | 2  | 1113 |
| 19 | 221 | 137 | 219 | 174 | -31 | 25 | 2  | 1113 |
| 19 | 221 | 137 | 219 | 174 | -13 | 27 | 2  | 1594 |
| 19 | 221 | 137 | 219 | 174 | 18  | 32 | 3  | 1724 |
| 19 | 221 | 137 | 219 | 174 | 25  | 35 | 3  | 1860 |
| 19 | 221 | 137 | 219 | 174 | 0   | 40 | 4  | 1870 |
| 19 | 221 | 137 | 219 | 174 | 3   | 31 | 3  | 1568 |

|    |     |     |     |     |     |     |     |      |
|----|-----|-----|-----|-----|-----|-----|-----|------|
| 14 | 226 | 158 | 226 | 187 | -1  | 20  | 6   | -436 |
| 14 | 226 | 158 | 226 | 187 | 4   | 28  | 5   | 76   |
| 14 | 226 | 158 | 226 | 187 | 23  | 11  | 2   | -27  |
| 14 | 226 | 158 | 226 | 187 | 4   | -7  | 1   | -689 |
| 14 | 226 | 158 | 226 | 187 | 7   | 4   | 5   | -978 |
| 14 | 226 | 158 | 226 | 187 | 3   | 8   | 3   | -152 |
| 14 | 226 | 158 | 226 | 187 | -19 | 20  | 6   | -253 |
| 14 | 226 | 158 | 226 | 187 | -5  | -1  | -2  | 358  |
| 14 | 226 | 158 | 226 | 187 | 4   | 24  | 5   | 19   |
| 14 | 226 | 158 | 226 | 187 | -7  | 3   | -1  | 471  |
| 14 | 226 | 158 | 226 | 187 | -5  | 9   | 1   | 235  |
| 14 | 226 | 158 | 226 | 187 | -14 | 10  | 0   | 550  |
| 14 | 226 | 158 | 226 | 187 | -7  | 5   | 1   | 124  |
| 14 | 226 | 158 | 226 | 187 | -1  | 18  | 2   | 600  |
| 14 | 226 | 158 | 226 | 187 | -16 | -30 | -11 | 203  |
| 14 | 226 | 158 | 226 | 187 | -20 | -17 | -6  | 68   |
| 14 | 226 | 158 | 226 | 187 | -21 | -26 | -9  | 141  |
| 14 | 226 | 158 | 226 | 187 | -23 | -15 | -7  | 574  |
| 14 | 226 | 158 | 226 | 187 | -22 | -17 | -8  | 550  |
| 14 | 226 | 158 | 226 | 187 | -20 | -11 | -5  | 436  |
| 14 | 226 | 158 | 226 | 187 | -18 | -11 | -7  | 673  |
| 14 | 226 | 158 | 226 | 187 | -12 | 2   | 0   | 258  |
| 14 | 226 | 158 | 226 | 187 | -15 | 3   | 0   | 314  |
| 14 | 226 | 158 | 226 | 187 | -15 | 5   | 0   | 417  |
| 14 | 226 | 158 | 226 | 187 | -16 | 4   | 0   | 366  |
| 14 | 226 | 158 | 226 | 187 | -21 | 5   | 0   | 417  |
| 14 | 226 | 158 | 226 | 187 | -22 | 2   | -2  | 606  |
| 14 | 226 | 158 | 226 | 187 | -16 | 7   | -1  | 759  |
| 14 | 226 | 158 | 226 | 187 | -31 | -3  | -3  | 555  |
| 14 | 226 | 158 | 226 | 187 | -14 | 0   | -4  | 1017 |
| 14 | 226 | 158 | 226 | 187 | -12 | 1   | -5  | 1315 |
| 14 | 226 | 158 | 226 | 187 | -26 | -9  | -2  | -50  |
| 14 | 226 | 158 | 226 | 187 | -24 | -7  | -2  | 61   |
| 14 | 226 | 158 | 226 | 187 | -4  | 4   | 0   | 180  |
| 14 | 226 | 158 | 226 | 187 | -4  | 4   | 0   | 180  |
| 14 | 226 | 158 | 226 | 187 | -6  | 0   | 0   | -21  |
| 14 | 226 | 158 | 226 | 187 | -34 | -10 | -4  | 184  |
| 14 | 226 | 158 | 226 | 187 | -21 | -5  | -3  | 323  |
| 14 | 226 | 158 | 226 | 187 | -18 | -6  | -3  | 128  |
| 14 | 226 | 158 | 226 | 187 | -19 | -6  | -3  | 141  |
| 14 | 226 | 158 | 226 | 187 | -19 | -6  | -3  | 141  |
| 14 | 226 | 158 | 226 | 187 | -12 | -2  | -2  | 325  |
| 14 | 226 | 158 | 226 | 187 | -13 | -1  | -2  | 219  |
| 14 | 226 | 158 | 226 | 187 | -16 | -1  | -2  | 421  |
| 14 | 226 | 158 | 226 | 187 | -6  | 3   | -1  | 493  |
| 14 | 226 | 158 | 226 | 187 | -24 | -1  | -2  | 509  |
| 14 | 226 | 158 | 226 | 187 | -4  | 10  | -1  | 772  |
| 14 | 226 | 158 | 226 | 187 | -4  | 10  | -1  | 772  |
| 14 | 226 | 158 | 226 | 187 | -17 | 10  | -1  | 786  |
| 14 | 226 | 158 | 226 | 187 | -17 | 10  | -1  | 786  |

|    |     |     |     |     |     |     |     |       |
|----|-----|-----|-----|-----|-----|-----|-----|-------|
| 14 | 226 | 158 | 226 | 187 | -17 | 10  | -1  | 786   |
| 14 | 226 | 158 | 226 | 187 | -19 | 11  | 0   | 819   |
| 14 | 226 | 158 | 226 | 187 | -22 | 5   | -1  | 536   |
| 14 | 226 | 158 | 226 | 187 | -29 | 12  | 1   | 589   |
| 14 | 226 | 158 | 226 | 187 | -13 | 14  | -1  | 1023  |
| 14 | 226 | 158 | 226 | 187 | -27 | 4   | -1  | 581   |
| 14 | 226 | 158 | 226 | 187 | -33 | -4  | -5  | 995   |
| 14 | 226 | 158 | 226 | 187 | -25 | -4  | -5  | 1044  |
| 14 | 226 | 158 | 226 | 187 | -99 | -77 | -33 | -5690 |
| 14 | 226 | 158 | 226 | 187 | -24 | 4   | 0   | 238   |
| 14 | 226 | 158 | 226 | 187 | 1   | 6   | 1   | 128   |
| 14 | 226 | 158 | 226 | 187 | -22 | 8   | 1   | 208   |
| 14 | 226 | 158 | 226 | 187 | -13 | 6   | -1  | 541   |
| 14 | 226 | 158 | 226 | 187 | -14 | 8   | 0   | 530   |
| 14 | 226 | 158 | 226 | 187 | -14 | 8   | 0   | 530   |
| 14 | 226 | 158 | 226 | 187 | -10 | 1   | -1  | 402   |
| 14 | 226 | 158 | 226 | 187 | -11 | 6   | -1  | 640   |
| 14 | 226 | 158 | 226 | 187 | -24 | 8   | -1  | 711   |
| 14 | 226 | 158 | 226 | 187 | -12 | 10  | 0   | 689   |
| 14 | 226 | 158 | 226 | 187 | -28 | 7   | -1  | 693   |
| 14 | 226 | 158 | 226 | 187 | -18 | 12  | -1  | 958   |
| 14 | 226 | 158 | 226 | 187 | -26 | 9   | -1  | 747   |
| 14 | 226 | 158 | 226 | 187 | -30 | 5   | -3  | 1230  |
| 14 | 226 | 158 | 226 | 187 | -31 | 13  | -2  | 1333  |
| 14 | 226 | 158 | 226 | 187 | 10  | 27  | 0   | 1497  |
| 14 | 226 | 158 | 226 | 187 | -61 | 9   | -2  | 1084  |
| 14 | 226 | 158 | 226 | 187 | -41 | 1   | -4  | 981   |
| 14 | 226 | 158 | 226 | 187 | -40 | 13  | -1  | 1176  |
| 14 | 226 | 158 | 226 | 187 | -54 | 9   | -4  | 1448  |
| 14 | 226 | 158 | 226 | 187 | -14 | 15  | -5  | 2347  |
| 14 | 226 | 158 | 226 | 187 | -50 | 0   | -4  | 882   |
| 14 | 226 | 158 | 226 | 187 | -19 | 12  | -2  | 1230  |
| 14 | 226 | 158 | 226 | 187 | -23 | 5   | -7  | 2516  |
| 14 | 226 | 158 | 226 | 187 | -19 | 17  | -4  | 2145  |
| 14 | 226 | 158 | 226 | 187 | -15 | 19  | -2  | 1725  |
| 14 | 226 | 158 | 226 | 187 | -19 | 22  | -2  | 1780  |
| 14 | 226 | 158 | 226 | 187 | -18 | 13  | -5  | 2176  |
| 14 | 226 | 158 | 226 | 187 | -17 | 15  | -3  | 1580  |
| 14 | 226 | 158 | 226 | 187 | -9  | 19  | -2  | 1698  |
| 14 | 226 | 158 | 226 | 187 | -43 | 17  | -2  | 1489  |
| 14 | 226 | 158 | 226 | 187 | -32 | 12  | -5  | 2210  |
| 14 | 226 | 158 | 226 | 187 | -28 | 6   | -3  | 854   |
| 14 | 226 | 158 | 226 | 187 | -14 | 2   | -4  | 912   |
| 14 | 226 | 158 | 226 | 187 | -5  | 19  | -2  | 1600  |
| 14 | 226 | 158 | 226 | 187 | -50 | 13  | -3  | 1371  |
| 14 | 226 | 158 | 226 | 187 | -32 | 15  | -3  | 1852  |
| 14 | 226 | 158 | 226 | 187 | 6   | 23  | -2  | 2118  |
| 14 | 226 | 158 | 226 | 187 | -31 | 12  | -2  | 1292  |
| 14 | 226 | 158 | 226 | 187 | -19 | 28  | -1  | 2128  |
| 14 | 226 | 158 | 226 | 187 | -24 | 21  | -3  | 2427  |

|    |     |     |     |     |     |     |     |      |
|----|-----|-----|-----|-----|-----|-----|-----|------|
| 14 | 226 | 158 | 226 | 187 | -16 | 19  | -2  | 1826 |
| 14 | 226 | 158 | 226 | 187 | -33 | 9   | -6  | 2454 |
| 12 | 206 | 152 | 165 | 183 | 1   | 15  | 3   | 79   |
| 12 | 206 | 152 | 165 | 183 | 6   | 23  | 2   | 591  |
| 12 | 206 | 152 | 165 | 183 | 9   | -1  | 2   | -463 |
| 12 | 206 | 152 | 165 | 183 | -5  | 16  | 3   | 420  |
| 12 | 206 | 152 | 165 | 183 | -5  | -2  | -4  | 986  |
| 12 | 206 | 152 | 165 | 183 | -16 | 12  | -2  | 956  |
| 12 | 206 | 152 | 165 | 183 | -14 | -35 | -14 | 718  |
| 12 | 206 | 152 | 165 | 183 | -18 | -22 | -9  | 583  |
| 12 | 206 | 152 | 165 | 183 | -19 | -31 | -12 | 656  |
| 12 | 206 | 152 | 165 | 183 | -10 | -3  | -3  | 773  |
| 12 | 206 | 152 | 165 | 183 | -13 | -2  | -3  | 829  |
| 12 | 206 | 152 | 165 | 183 | -19 | 0   | -3  | 932  |
| 12 | 206 | 152 | 165 | 183 | -14 | 2   | -4  | 1274 |
| 12 | 206 | 152 | 165 | 183 | -29 | -8  | -6  | 1070 |
| 12 | 206 | 152 | 165 | 183 | -12 | -5  | -7  | 1532 |
| 12 | 206 | 152 | 165 | 183 | -14 | -6  | -5  | 936  |
| 12 | 206 | 152 | 165 | 183 | -4  | -2  | -4  | 1008 |
| 12 | 206 | 152 | 165 | 183 | -2  | 5   | -4  | 1287 |
| 12 | 206 | 152 | 165 | 183 | -2  | 5   | -4  | 1287 |
| 12 | 206 | 152 | 165 | 183 | -15 | 5   | -4  | 1301 |
| 12 | 206 | 152 | 165 | 183 | -17 | 6   | -3  | 1334 |
| 12 | 206 | 152 | 165 | 183 | -27 | 7   | -2  | 1104 |
| 12 | 206 | 152 | 165 | 183 | -11 | 9   | -4  | 1538 |
| 12 | 206 | 152 | 165 | 183 | -25 | -1  | -4  | 1096 |
| 12 | 206 | 152 | 165 | 183 | -31 | -9  | -8  | 1510 |
| 12 | 206 | 152 | 165 | 183 | -23 | -9  | -8  | 1559 |
| 12 | 206 | 152 | 165 | 183 | -22 | -1  | -3  | 753  |
| 12 | 206 | 152 | 165 | 183 | 3   | 1   | -2  | 643  |
| 12 | 206 | 152 | 165 | 183 | -20 | 3   | -2  | 723  |
| 12 | 206 | 152 | 165 | 183 | -11 | 1   | -4  | 1056 |
| 12 | 206 | 152 | 165 | 183 | -12 | 3   | -3  | 1045 |
| 12 | 206 | 152 | 165 | 183 | -8  | -4  | -4  | 917  |
| 12 | 206 | 152 | 165 | 183 | -9  | 1   | -4  | 1155 |
| 12 | 206 | 152 | 165 | 183 | -10 | 5   | -3  | 1204 |
| 12 | 206 | 152 | 165 | 183 | -26 | 2   | -4  | 1208 |
| 12 | 206 | 152 | 165 | 183 | -16 | 7   | -4  | 1473 |
| 12 | 206 | 152 | 165 | 183 | -24 | 4   | -4  | 1262 |
| 12 | 206 | 152 | 165 | 183 | -28 | 0   | -6  | 1745 |
| 12 | 206 | 152 | 165 | 183 | -29 | 8   | -5  | 1848 |
| 12 | 206 | 152 | 165 | 183 | 12  | 22  | -3  | 2012 |
| 12 | 206 | 152 | 165 | 183 | -39 | -4  | -7  | 1496 |
| 12 | 206 | 152 | 165 | 183 | -38 | 8   | -4  | 1691 |
| 12 | 206 | 152 | 165 | 183 | -31 | 6   | -9  | 2750 |
| 12 | 206 | 152 | 165 | 183 | -17 | 12  | -7  | 2660 |
| 12 | 206 | 152 | 165 | 183 | -15 | 10  | -6  | 2095 |
| 12 | 206 | 152 | 165 | 183 | -7  | 14  | -5  | 2213 |
| 12 | 206 | 152 | 165 | 183 | -41 | 12  | -5  | 2004 |
| 12 | 206 | 152 | 165 | 183 | 8   | 18  | -5  | 2633 |

|    |     |     |     |     |     |     |    |       |
|----|-----|-----|-----|-----|-----|-----|----|-------|
| 41 | 245 | 86  | 245 | 91  | 22  | 14  | 12 | -2499 |
| 41 | 245 | 86  | 245 | 91  | 37  | 18  | 12 | -2166 |
| 41 | 245 | 86  | 245 | 91  | 26  | 2   | 9  | -2215 |
| 41 | 245 | 86  | 245 | 91  | 16  | 15  | 12 | -2158 |
| 41 | 245 | 86  | 245 | 91  | 16  | -3  | 5  | -1592 |
| 41 | 245 | 86  | 245 | 91  | 7   | -36 | -5 | -1860 |
| 41 | 245 | 86  | 245 | 91  | 3   | -23 | 0  | -1995 |
| 41 | 245 | 86  | 245 | 91  | 2   | -32 | -3 | -1922 |
| 41 | 245 | 86  | 245 | 91  | 12  | -5  | 6  | -1887 |
| 41 | 245 | 86  | 245 | 91  | 11  | -4  | 6  | -1805 |
| 41 | 245 | 86  | 245 | 91  | 8   | -3  | 6  | -1749 |
| 41 | 245 | 86  | 245 | 91  | 8   | -1  | 6  | -1646 |
| 41 | 245 | 86  | 245 | 91  | 2   | -1  | 6  | -1646 |
| 41 | 245 | 86  | 245 | 91  | 7   | 1   | 5  | -1304 |
| 41 | 245 | 86  | 245 | 91  | -8  | -9  | 3  | -1508 |
| 41 | 245 | 86  | 245 | 91  | 7   | -7  | 4  | -1642 |
| 41 | 245 | 86  | 245 | 91  | 17  | -3  | 5  | -1570 |
| 41 | 245 | 86  | 245 | 91  | 19  | 4   | 5  | -1291 |
| 41 | 245 | 86  | 245 | 91  | 19  | 4   | 5  | -1291 |
| 41 | 245 | 86  | 245 | 91  | 6   | 4   | 5  | -1277 |
| 41 | 245 | 86  | 245 | 91  | 4   | 5   | 6  | -1244 |
| 41 | 245 | 86  | 245 | 91  | -6  | 6   | 7  | -1474 |
| 41 | 245 | 86  | 245 | 91  | 10  | 8   | 5  | -1040 |
| 41 | 245 | 86  | 245 | 91  | -4  | -2  | 5  | -1482 |
| 41 | 245 | 86  | 245 | 91  | -10 | -10 | 1  | -1068 |
| 41 | 245 | 86  | 245 | 91  | -2  | -10 | 1  | -1019 |
| 41 | 245 | 86  | 245 | 91  | -1  | -2  | 6  | -1825 |
| 41 | 245 | 86  | 245 | 91  | 24  | 0   | 7  | -1935 |
| 41 | 245 | 86  | 245 | 91  | 1   | 2   | 7  | -1855 |
| 41 | 245 | 86  | 245 | 91  | 10  | 0   | 5  | -1522 |
| 41 | 245 | 86  | 245 | 91  | 9   | 2   | 6  | -1533 |
| 41 | 245 | 86  | 245 | 91  | 13  | -5  | 5  | -1661 |
| 41 | 245 | 86  | 245 | 91  | 12  | 0   | 5  | -1423 |
| 41 | 245 | 86  | 245 | 91  | 11  | 4   | 6  | -1374 |
| 41 | 245 | 86  | 245 | 91  | -5  | 1   | 5  | -1370 |
| 41 | 245 | 86  | 245 | 91  | -3  | 3   | 5  | -1316 |
| 41 | 245 | 86  | 245 | 91  | -7  | -1  | 3  | -833  |
| 41 | 245 | 86  | 245 | 91  | -8  | 7   | 4  | -730  |
| 41 | 245 | 86  | 245 | 91  | 33  | 21  | 6  | -566  |
| 41 | 245 | 86  | 245 | 91  | -18 | -5  | 2  | -1082 |
| 41 | 245 | 86  | 245 | 91  | -17 | 7   | 5  | -887  |
| 41 | 245 | 86  | 245 | 91  | -31 | 3   | 2  | -615  |
| 41 | 245 | 86  | 245 | 91  | 4   | 11  | 2  | 82    |
| 41 | 245 | 86  | 245 | 91  | 8   | 13  | 4  | -338  |
| 41 | 245 | 86  | 245 | 91  | 6   | 9   | 3  | -483  |
| 41 | 245 | 86  | 245 | 91  | 14  | 13  | 4  | -365  |
| 41 | 245 | 86  | 245 | 91  | -20 | 11  | 4  | -574  |
| 41 | 245 | 86  | 245 | 91  | -9  | 6   | 1  | 147   |
| 41 | 245 | 86  | 245 | 91  | -10 | 3   | 0  | 391   |
| 26 | 219 | 108 | 202 | 133 | 30  | 18  | 11 | -1537 |

|    |     |     |     |     |    |     |    |       |
|----|-----|-----|-----|-----|----|-----|----|-------|
| 26 | 219 | 108 | 202 | 133 | 53 | 22  | 10 | -1265 |
| 26 | 219 | 108 | 202 | 133 | 44 | 7   | 6  | -1049 |
| 26 | 219 | 108 | 202 | 133 | 28 | -28 | -4 | -1143 |
| 26 | 219 | 108 | 202 | 133 | 27 | -19 | -3 | -734  |
| 26 | 219 | 108 | 202 | 133 | 37 | 0   | 5  | -1026 |
| 26 | 219 | 108 | 202 | 133 | 34 | 1   | 5  | -970  |
| 26 | 219 | 108 | 202 | 133 | 34 | 3   | 5  | -867  |
| 26 | 219 | 108 | 202 | 133 | 33 | 2   | 5  | -918  |
| 26 | 219 | 108 | 202 | 133 | 28 | 3   | 5  | -867  |
| 26 | 219 | 108 | 202 | 133 | 33 | 5   | 4  | -525  |
| 26 | 219 | 108 | 202 | 133 | 18 | -5  | 2  | -729  |
| 26 | 219 | 108 | 202 | 133 | 45 | 2   | 5  | -1104 |
| 26 | 219 | 108 | 202 | 133 | 33 | -3  | 3  | -863  |
| 26 | 219 | 108 | 202 | 133 | 43 | 1   | 4  | -791  |
| 26 | 219 | 108 | 202 | 133 | 45 | 8   | 4  | -512  |
| 26 | 219 | 108 | 202 | 133 | 45 | 8   | 4  | -512  |
| 26 | 219 | 108 | 202 | 133 | 32 | 8   | 4  | -498  |
| 26 | 219 | 108 | 202 | 133 | 36 | 12  | 4  | -261  |
| 26 | 219 | 108 | 202 | 133 | 22 | 2   | 4  | -703  |
| 26 | 219 | 108 | 202 | 133 | 25 | 2   | 5  | -1046 |
| 26 | 219 | 108 | 202 | 133 | 50 | 4   | 6  | -1156 |
| 26 | 219 | 108 | 202 | 133 | 36 | 4   | 4  | -743  |
| 26 | 219 | 108 | 202 | 133 | 35 | 6   | 5  | -754  |
| 26 | 219 | 108 | 202 | 133 | 39 | -1  | 4  | -882  |
| 26 | 219 | 108 | 202 | 133 | 38 | 4   | 4  | -644  |
| 26 | 219 | 108 | 202 | 133 | 21 | 5   | 4  | -591  |
| 26 | 219 | 108 | 202 | 133 | 18 | 11  | 3  | 49    |
| 26 | 219 | 108 | 202 | 133 | 32 | 13  | 2  | 296   |
| 26 | 219 | 108 | 202 | 133 | 40 | 17  | 3  | 414   |
| 26 | 219 | 108 | 202 | 133 | 17 | 10  | 0  | 926   |
| 26 | 219 | 108 | 202 | 133 | 35 | 0   | 1  | -372  |
| 26 | 219 | 108 | 202 | 133 | 44 | 17  | 3  | 316   |
| 26 | 219 | 108 | 202 | 133 | 17 | 13  | 2  | 568   |
| 26 | 219 | 108 | 202 | 133 | 30 | 26  | 4  | 844   |
| 36 | 295 | 127 | 291 | 143 | 13 | 1   | 8  | -2043 |
| 36 | 295 | 127 | 291 | 143 | 27 | -10 | 3  | -1555 |
| 36 | 295 | 127 | 291 | 143 | 31 | -1  | 4  | -1190 |
| 36 | 295 | 127 | 291 | 143 | 11 | -45 | -7 | -1649 |
| 36 | 295 | 127 | 291 | 143 | 10 | -36 | -6 | -1240 |
| 36 | 295 | 127 | 291 | 143 | 20 | -17 | 2  | -1532 |
| 36 | 295 | 127 | 291 | 143 | 11 | -14 | 2  | -1373 |
| 36 | 295 | 127 | 291 | 143 | 1  | -22 | -1 | -1235 |
| 36 | 295 | 127 | 291 | 143 | 28 | -15 | 2  | -1610 |
| 36 | 295 | 127 | 291 | 143 | 16 | -20 | 0  | -1369 |
| 36 | 295 | 127 | 291 | 143 | 28 | -9  | 1  | -1018 |
| 36 | 295 | 127 | 291 | 143 | 15 | -9  | 1  | -1004 |
| 36 | 295 | 127 | 291 | 143 | 19 | -5  | 1  | -767  |
| 36 | 295 | 127 | 291 | 143 | 5  | -15 | 1  | -1209 |
| 36 | 295 | 127 | 291 | 143 | 8  | -15 | 2  | -1552 |
| 36 | 295 | 127 | 291 | 143 | 18 | -11 | 2  | -1260 |

|    |     |     |     |     |     |     |    |       |
|----|-----|-----|-----|-----|-----|-----|----|-------|
| 36 | 295 | 127 | 291 | 143 | 22  | -18 | 1  | -1388 |
| 36 | 295 | 127 | 291 | 143 | 21  | -13 | 1  | -1150 |
| 36 | 295 | 127 | 291 | 143 | 4   | -12 | 1  | -1097 |
| 36 | 295 | 127 | 291 | 143 | 1   | -6  | 0  | -457  |
| 36 | 295 | 127 | 291 | 143 | 15  | -4  | -1 | -210  |
| 36 | 295 | 127 | 291 | 143 | 23  | 0   | 0  | -92   |
| 36 | 295 | 127 | 291 | 143 | 0   | -7  | -3 | 420   |
| 36 | 295 | 127 | 291 | 143 | 18  | -17 | -2 | -878  |
| 36 | 295 | 127 | 291 | 143 | 0   | -4  | -1 | 62    |
| 36 | 295 | 127 | 291 | 143 | 13  | 9   | 1  | 338   |
| 19 | 221 | 137 | 219 | 174 | 22  | 24  | 10 | -729  |
| 19 | 221 | 137 | 219 | 174 | 26  | 19  | 10 | -1010 |
| 19 | 221 | 137 | 219 | 174 | 18  | 32  | 11 | -694  |
| 19 | 221 | 137 | 219 | 174 | 31  | 37  | 10 | -210  |
| 19 | 221 | 137 | 219 | 174 | 9   | 20  | 4  | 341   |
| 19 | 221 | 137 | 219 | 174 | 47  | 23  | 7  | -255  |
| 19 | 221 | 137 | 219 | 174 | 1   | 7   | 3  | -223  |
| 19 | 221 | 137 | 219 | 174 | 20  | 17  | 7  | -312  |
| 19 | 221 | 137 | 219 | 174 | 15  | 11  | 5  | -363  |
| 19 | 221 | 137 | 219 | 174 | 10  | 9   | 5  | -550  |
| 19 | 221 | 137 | 219 | 174 | 31  | 35  | 5  | 1257  |
| 19 | 221 | 137 | 219 | 174 | -21 | 5   | 8  | -1578 |
| 19 | 221 | 137 | 219 | 174 | 12  | 9   | 8  | -1335 |
| 19 | 221 | 137 | 219 | 174 | -3  | 6   | 8  | -1352 |
| 19 | 221 | 137 | 219 | 174 | -1  | -5  | -1 | -190  |
| 19 | 221 | 137 | 219 | 174 | 1   | -14 | -6 | 93    |
| 19 | 221 | 137 | 219 | 174 | -1  | -5  | -2 | 180   |
| 19 | 221 | 137 | 219 | 174 | -4  | -4  | -2 | 276   |
| 19 | 221 | 137 | 219 | 174 | -11 | -5  | -4 | 650   |
| 19 | 221 | 137 | 219 | 174 | 5   | 13  | 2  | 405   |
| 19 | 221 | 137 | 219 | 174 | -2  | 6   | 2  | -79   |
| 19 | 221 | 137 | 219 | 174 | -3  | 23  | 5  | 560   |
| 19 | 221 | 137 | 219 | 174 | 6   | 15  | 2  | 692   |
| 19 | 221 | 137 | 219 | 174 | -5  | 20  | 4  | 450   |
| 19 | 221 | 137 | 219 | 174 | 1   | 24  | 4  | 712   |
| 19 | 221 | 137 | 219 | 174 | 11  | 19  | 4  | 336   |
| 19 | 221 | 137 | 219 | 174 | -56 | 21  | 4  | 547   |
| 19 | 221 | 137 | 219 | 174 | -40 | 25  | 3  | 948   |
| 19 | 221 | 137 | 219 | 174 | 43  | 26  | 4  | 652   |
| 19 | 221 | 137 | 219 | 174 | -21 | 0   | -4 | 1140  |
| 19 | 221 | 137 | 219 | 174 | -8  | 24  | 0  | 1637  |
| 19 | 221 | 137 | 219 | 174 | -2  | 17  | 5  | 159   |
| 19 | 221 | 137 | 219 | 174 | -24 | 16  | 2  | 853   |
| 19 | 221 | 137 | 219 | 174 | -36 | 3   | -1 | 608   |
| 19 | 221 | 137 | 219 | 174 | -12 | 25  | 2  | 1196  |
| 19 | 221 | 137 | 219 | 174 | -29 | 3   | -1 | 596   |
| 19 | 221 | 137 | 219 | 174 | -34 | 21  | 3  | 780   |
| 19 | 221 | 137 | 219 | 174 | 15  | 24  | 1  | 1680  |
| 19 | 221 | 137 | 219 | 174 | -12 | 10  | 1  | 522   |
| 19 | 221 | 137 | 219 | 174 | -10 | 18  | -2 | 2259  |

|    |     |     |     |     |     |     |     |       |
|----|-----|-----|-----|-----|-----|-----|-----|-------|
| 19 | 221 | 137 | 219 | 174 | -21 | 16  | -1  | 1647  |
| 19 | 221 | 137 | 219 | 174 | -5  | 21  | 2   | 1075  |
| 19 | 221 | 137 | 219 | 174 | -21 | 0   | -4  | 1140  |
| 19 | 221 | 137 | 219 | 174 | -4  | 24  | 2   | 1182  |
| 19 | 221 | 137 | 219 | 174 | 5   | 2   | -1  | 359   |
| 19 | 191 | 112 | 191 | 131 | 4   | 18  | 5   | -18   |
| 19 | 191 | 112 | 191 | 131 | 42  | 21  | 8   | -614  |
| 19 | 191 | 112 | 191 | 131 | 15  | 15  | 8   | -671  |
| 19 | 191 | 112 | 191 | 131 | 10  | 9   | 6   | -722  |
| 19 | 191 | 112 | 191 | 131 | -26 | 3   | 9   | -1937 |
| 19 | 191 | 112 | 191 | 131 | -6  | -7  | 0   | -549  |
| 19 | 191 | 112 | 191 | 131 | -6  | -7  | -1  | -179  |
| 19 | 191 | 112 | 191 | 131 | 0   | 11  | 3   | 46    |
| 19 | 191 | 112 | 191 | 131 | -10 | 18  | 5   | 91    |
| 19 | 191 | 112 | 191 | 131 | -61 | 19  | 5   | 188   |
| 19 | 191 | 112 | 191 | 131 | -10 | 19  | 3   | 716   |
| 19 | 191 | 112 | 191 | 131 | -41 | 1   | 0   | 249   |
| 19 | 191 | 112 | 191 | 131 | -39 | 19  | 4   | 421   |
| 19 | 191 | 112 | 191 | 131 | -17 | 8   | 2   | 163   |
| 19 | 191 | 112 | 191 | 131 | -26 | 14  | 0   | 1288  |
| 19 | 191 | 112 | 191 | 131 | -26 | -2  | -3  | 781   |
| 19 | 191 | 112 | 191 | 131 | 0   | 0   | 0   | 0     |
| 15 | 213 | 145 | 213 | 183 | 21  | 2   | 4   | -803  |
| 15 | 213 | 145 | 213 | 183 | 25  | -3  | 4   | -1084 |
| 15 | 213 | 145 | 213 | 183 | 17  | 10  | 5   | -768  |
| 15 | 213 | 145 | 213 | 183 | 30  | 15  | 4   | -284  |
| 15 | 213 | 145 | 213 | 183 | 29  | -15 | 4   | -1691 |
| 15 | 213 | 145 | 213 | 183 | 8   | -2  | -2  | 267   |
| 15 | 213 | 145 | 213 | 183 | 20  | -11 | 2   | -1266 |
| 15 | 213 | 145 | 213 | 183 | -4  | -16 | 2   | -1426 |
| 15 | 213 | 145 | 213 | 183 | -2  | -27 | -8  | 106   |
| 15 | 213 | 145 | 213 | 183 | -12 | -27 | -10 | 576   |
| 15 | 213 | 145 | 213 | 183 | 4   | -9  | -4  | 331   |
| 15 | 213 | 145 | 213 | 183 | 5   | -7  | -4  | 618   |
| 15 | 213 | 145 | 213 | 183 | -6  | -2  | -2  | 376   |
| 15 | 213 | 145 | 213 | 183 | -41 | 3   | -3  | 874   |
| 15 | 213 | 145 | 213 | 183 | 42  | 4   | -2  | 578   |
| 15 | 213 | 145 | 213 | 183 | -22 | -22 | -10 | 1066  |
| 15 | 213 | 145 | 213 | 183 | -22 | -6  | -7  | 1573  |
| 15 | 213 | 145 | 213 | 183 | -13 | 3   | -4  | 1122  |
| 15 | 213 | 145 | 213 | 183 | -35 | -1  | -3  | 706   |
| 15 | 213 | 145 | 213 | 183 | -1  | 5   | -6  | 1871  |
| 18 | 389 | 244 | 319 | 280 | 0   | 0   | 8   | -1780 |
| 18 | 389 | 244 | 319 | 280 | 4   | -5  | 8   | -2061 |
| 18 | 389 | 244 | 319 | 280 | 8   | -17 | 8   | -2668 |
| 18 | 389 | 244 | 319 | 280 | -13 | -4  | 2   | -710  |
| 18 | 389 | 244 | 319 | 280 | 25  | -1  | 5   | -1306 |
| 18 | 389 | 244 | 319 | 280 | -21 | -17 | 1   | -1274 |
| 18 | 389 | 244 | 319 | 280 | -2  | -7  | 5   | -1363 |
| 18 | 389 | 244 | 319 | 280 | -7  | -13 | 3   | -1414 |



|    |     |     |     |     |     |     |    |       |
|----|-----|-----|-----|-----|-----|-----|----|-------|
| 18 | 389 | 244 | 319 | 280 | -12 | -15 | 3  | -1601 |
| 18 | 389 | 244 | 319 | 280 | -43 | -19 | 6  | -2629 |
| 18 | 389 | 244 | 319 | 280 | -23 | -29 | -3 | -1241 |
| 18 | 389 | 244 | 319 | 280 | -23 | -29 | -4 | -871  |
| 18 | 389 | 244 | 319 | 280 | -24 | -18 | 0  | -1130 |
| 18 | 389 | 244 | 319 | 280 | -27 | -4  | 2  | -601  |
| 18 | 389 | 244 | 319 | 280 | -21 | 0   | 2  | -339  |
| 18 | 389 | 244 | 319 | 280 | -11 | -5  | 2  | -715  |
| 18 | 389 | 244 | 319 | 280 | -78 | -3  | 2  | -504  |
| 18 | 389 | 244 | 319 | 280 | -62 | 1   | 1  | -103  |
| 18 | 389 | 244 | 319 | 280 | 21  | 2   | 2  | -399  |
| 18 | 389 | 244 | 319 | 280 | -43 | -24 | -6 | 89    |
| 18 | 389 | 244 | 319 | 280 | -30 | 0   | -2 | 586   |
| 18 | 389 | 244 | 319 | 280 | -24 | -7  | 3  | -892  |
| 18 | 389 | 244 | 319 | 280 | -43 | -8  | -3 | 596   |
| 18 | 389 | 244 | 319 | 280 | -46 | -8  | 0  | -198  |
| 18 | 389 | 244 | 319 | 280 | -58 | -21 | -3 | -443  |
| 18 | 389 | 244 | 319 | 280 | -34 | 1   | 0  | 145   |
| 18 | 389 | 244 | 319 | 280 | -56 | -3  | 1  | -271  |
| 18 | 389 | 244 | 319 | 280 | -34 | -14 | -1 | -529  |
| 18 | 389 | 244 | 319 | 280 | -31 | -6  | 0  | -455  |
| 18 | 389 | 244 | 319 | 280 | -17 | -10 | -1 | -390  |
| 18 | 389 | 244 | 319 | 280 | -43 | -8  | -3 | 596   |
| 18 | 389 | 244 | 319 | 280 | -27 | -3  | 0  | 24    |
| 18 | 389 | 244 | 319 | 280 | -22 | 3   | -2 | 894   |
| 18 | 389 | 244 | 319 | 280 | -43 | -24 | -6 | 89    |
| 18 | 389 | 244 | 319 | 280 | -31 | 2   | -1 | 532   |
| 18 | 389 | 244 | 319 | 280 | -18 | -18 | -1 | -814  |
| 18 | 389 | 244 | 319 | 280 | -12 | 10  | 1  | 519   |
| 26 | 264 | 145 | 264 | 145 | 6   | -1  | 6  | -1441 |
| 26 | 264 | 145 | 264 | 145 | 11  | 17  | 6  | -641  |
| 26 | 264 | 145 | 264 | 145 | -11 | 0   | 0  | -90   |
| 26 | 264 | 145 | 264 | 145 | 0   | -3  | 3  | -743  |
| 26 | 264 | 145 | 264 | 145 | -5  | -9  | 1  | -794  |
| 26 | 264 | 145 | 264 | 145 | 11  | 15  | 1  | 826   |
| 26 | 264 | 145 | 264 | 145 | -41 | -15 | 4  | -2009 |
| 26 | 264 | 145 | 264 | 145 | -21 | -25 | -5 | -621  |
| 26 | 264 | 145 | 264 | 145 | -21 | -25 | -6 | -251  |
| 26 | 264 | 145 | 264 | 145 | -15 | -7  | -2 | -26   |
| 26 | 264 | 145 | 264 | 145 | -25 | 0   | 0  | 19    |
| 26 | 264 | 145 | 264 | 145 | -9  | -1  | 0  | -95   |
| 26 | 264 | 145 | 264 | 145 | -76 | 1   | 0  | 116   |
| 26 | 264 | 145 | 264 | 145 | -56 | -17 | -5 | 177   |
| 26 | 264 | 145 | 264 | 145 | -54 | 1   | -1 | 349   |
| 26 | 264 | 145 | 264 | 145 | -5  | 4   | -3 | 1249  |
| 26 | 264 | 145 | 264 | 145 | -32 | -10 | -3 | 91    |
| 26 | 264 | 145 | 264 | 145 | -41 | -4  | -5 | 1216  |
| 26 | 264 | 145 | 264 | 145 | -25 | 1   | -2 | 644   |
| 26 | 264 | 145 | 264 | 145 | -41 | -20 | -8 | 709   |
| 22 | 180 | 104 | 180 | 110 | 22  | -8  | 7  | -2292 |

|    |     |     |     |     |     |     |    |       |
|----|-----|-----|-----|-----|-----|-----|----|-------|
| 22 | 180 | 104 | 180 | 110 | 1   | 5   | 1  | -334  |
| 22 | 180 | 104 | 180 | 110 | 12  | 2   | 4  | -987  |
| 22 | 180 | 104 | 180 | 110 | -29 | -10 | 5  | -2253 |
| 22 | 180 | 104 | 180 | 110 | 13  | -4  | 5  | -1867 |
| 22 | 180 | 104 | 180 | 110 | -9  | -20 | -5 | -495  |
| 22 | 180 | 104 | 180 | 110 | -19 | -20 | -7 | -25   |
| 22 | 180 | 104 | 180 | 110 | -2  | 0   | -1 | 17    |
| 22 | 180 | 104 | 180 | 110 | -13 | 5   | 1  | -225  |
| 22 | 180 | 104 | 180 | 110 | -29 | -15 | -7 | 465   |
| 22 | 180 | 104 | 180 | 110 | -20 | 10  | -1 | 521   |
| 22 | 180 | 104 | 180 | 110 | -42 | 6   | 0  | 105   |
| 22 | 180 | 104 | 180 | 110 | -8  | 12  | -3 | 1270  |
| 12 | 286 | 214 | 245 | 263 | 28  | -3  | 6  | -1439 |
| 12 | 286 | 214 | 245 | 263 | -2  | 22  | 6  | -232  |
| 12 | 286 | 214 | 245 | 263 | 31  | 26  | 7  | -183  |
| 12 | 286 | 214 | 245 | 263 | 7   | 2   | 0  | 180   |
| 12 | 286 | 214 | 245 | 263 | 18  | 7   | 3  | -134  |
| 12 | 286 | 214 | 245 | 263 | 13  | 1   | 1  | -185  |
| 12 | 286 | 214 | 245 | 263 | 8   | -1  | 1  | -372  |
| 12 | 286 | 214 | 245 | 263 | 10  | -1  | 4  | -1157 |
| 12 | 286 | 214 | 245 | 263 | -3  | -15 | -6 | 358   |
| 12 | 286 | 214 | 245 | 263 | -13 | -15 | -8 | 828   |
| 12 | 286 | 214 | 245 | 263 | -4  | -4  | -2 | 99    |
| 12 | 286 | 214 | 245 | 263 | -5  | 13  | 1  | 738   |
| 12 | 286 | 214 | 245 | 263 | 5   | 2   | -1 | 404   |
| 12 | 286 | 214 | 245 | 263 | -7  | 10  | 0  | 628   |
| 12 | 286 | 214 | 245 | 263 | -23 | -10 | -8 | 1318  |
| 12 | 286 | 214 | 245 | 263 | -5  | 4   | -1 | 526   |
| 12 | 286 | 214 | 245 | 263 | -23 | 6   | -5 | 1825  |
| 12 | 286 | 214 | 245 | 263 | -22 | 16  | 0  | 1082  |
| 12 | 286 | 214 | 245 | 263 | -23 | 6   | -2 | 1010  |
| 12 | 286 | 214 | 245 | 263 | -5  | 11  | -1 | 1107  |
| 12 | 286 | 214 | 245 | 263 | -23 | 6   | -5 | 1825  |
| 12 | 286 | 214 | 245 | 263 | 56  | -8  | -3 | 85    |
| 12 | 286 | 214 | 245 | 263 | 7   | 3   | -5 | 1717  |
| 12 | 286 | 214 | 245 | 263 | -7  | -3  | 5  | -1717 |

| bio5ED | bio6ED | bio7ED | bio8ED | bio9ED | bio10ED | bio11ED | bio12ED | bio13ED |
|--------|--------|--------|--------|--------|---------|---------|---------|---------|
| 34     | 17     | 17     | -111   | 137    | 11      | 28      | 232     | 26      |
| 55     | 12     | 43     | -32    | 149    | 23      | 27      | -102    | -9      |
| 55     | 33     | 22     | -43    | 166    | 40      | 45      | 62      | 2       |
| 10     | 33     | -23    | -39    | 35     | 10      | 33      | -85     | -1      |
| 18     | 38     | -20    | -96    | 137    | 11      | 41      | 28      | 6       |
| 29     | 21     | 8      | -45    | 35     | 17      | 25      | -73     | -16     |
| 13     | -6     | 19     | -21    | -10    | -6      | 5       | 114     | 23      |
| 26     | 3      | 23     | -6     | 22     | 7       | 14      | 51      | 15      |
| 20     | 6      | 14     | 19     | 25     | 15      | 8       | 129     | 8       |
| 46     | 12     | 34     | -27    | 11     | 21      | 25      | 91      | 7       |
| 21     | 3      | 18     | 15     | 25     | 11      | 9       | -13     | 0       |
| 21     | -10    | 31     | -138   | 50     | 7       | -3      | 420     | 31      |
| 41     | 1      | 40     | -126   | 28     | 22      | 10      | 241     | 15      |
| -12    | 9      | -21    | 3      | -3     | 2       | 4       | -151    | -17     |
| -10    | 1      | -11    | -62    | -1     | -4      | 2       | 56      | 9       |
| -14    | 5      | -19    | -60    | -5     | -4      | 1       | -117    | -12     |
| -3     | -11    | 8      | -1     | -8     | 2       | -6      | -22     | -4      |
| 0      | -3     | 3      | 2      | -8     | 4       | -4      | -150    | -13     |
| -2     | -8     | 6      | 4      | -3     | 0       | -4      | -39     | -4      |
| 20     | -5     | 25     | 14     | 5      | 10      | -2      | -72     | -7      |
| 6      | -12    | 18     | 11     | -3     | 7       | -5      | -166    | -12     |
| 12     | 4      | 8      | 10     | 11     | 6       | 5       | 5       | 0       |
| 10     | -2     | 12     | 8      | 9      | 4       | 1       | 14      | 0       |
| 14     | -4     | 18     | 9      | 7      | 5       | -1      | 8       | 0       |
| 10     | -5     | 15     | 8      | 9      | 4       | -1      | 18      | 4       |
| 6      | -11    | 17     | 3      | 4      | -1      | -8      | 43      | 8       |
| 23     | -9     | 32     | 14     | 5      | 10      | -6      | -82     | -6      |
| -5     | -19    | 14     | -5     | -10    | -9      | -18     | 92      | 11      |
| 22     | -10    | 32     | 19     | -24    | 15      | -7      | -167    | -13     |
| -15    | -5     | -10    | -142   | 36     | -12     | -5      | 390     | 47      |
| -9     | -4     | -5     | -4     | 5      | -8      | -4      | 244     | 25      |
| 21     | 10     | 11     | 17     | 23     | 13      | 13      | 34      | -2      |
| 21     | 10     | 11     | 17     | 23     | 13      | 13      | 34      | -2      |
| 13     | 13     | 0      | 12     | 21     | 8       | 14      | 55      | -1      |
| -16    | -16    | 0      | -151   | -6     | -17     | -16     | 400     | 44      |
| 2      | -8     | 10     | -142   | 6      | -2      | -6      | 201     | 15      |
| 1      | -3     | 4      | -138   | 10     | -2      | 0       | 203     | 14      |
| 1      | -3     | 4      | -138   | 10     | -2      | 0       | 203     | 14      |
| 13     | 0      | 13     | 11     | 16     | 7       | 4       | 60      | 2       |
| 11     | -3     | 14     | -6     | 11     | 4       | -2      | 86      | 2       |
| 24     | 4      | 20     | 19     | 21     | 15      | 7       | -70     | -14     |
| 3      | -14    | 17     | -14    | 2      | -3      | -12     | 156     | 9       |
| 34     | -2     | 36     | 25     | -8     | 21      | 4       | -84     | -7      |
| 34     | -2     | 36     | 25     | -8     | 21      | 4       | -84     | -7      |
| 19     | -17    | 36     | 11     | -23    | 7       | -10     | -21     | 2       |
| 19     | -17    | 36     | 11     | -23    | 7       | -10     | -21     | 2       |
| 19     | -17    | 36     | 11     | -23    | 7       | -10     | -21     | 2       |
| 18     | -20    | 38     | 9      | -25    | 5       | -12     | 8       | 4       |
| 7      | -14    | 21     | 3      | 3      | -1      | -10     | 54      | 7       |

|     |     |     |      |     |     |     |      |    |
|-----|-----|-----|------|-----|-----|-----|------|----|
| 7   | -24 | 31  | -2   | -4  | -6  | -17 | 54   | 7  |
| 33  | -15 | 48  | 19   | -19 | 15  | -8  | -88  | -4 |
| 2   | -19 | 21  | -1   | -31 | -5  | -15 | 27   | 6  |
| 0   | -28 | 28  | -1   | -42 | -5  | -26 | -48  | 6  |
| 8   | -21 | 29  | 7    | -35 | 3   | -19 | -70  | 6  |
| 3   | -11 | 14  | -143 | 3   | -6  | -7  | 144  | 12 |
| 28  | 15  | 13  | 22   | 29  | 18  | 19  | 12   | 0  |
| 8   | -9  | 17  | -141 | 5   | -4  | -5  | 116  | 8  |
| 19  | -6  | 25  | 13   | 15  | 9   | -1  | -71  | -9 |
| 18  | -9  | 27  | 11   | 13  | 7   | -2  | 3    | -2 |
| 18  | -9  | 27  | 11   | 13  | 7   | -2  | 3    | -2 |
| 17  | 2   | 15  | 13   | 17  | 9   | 4   | -15  | -8 |
| 24  | -6  | 30  | 16   | -13 | 12  | 0   | 223  | 30 |
| 12  | -21 | 33  | 4    | -27 | 0   | -14 | 175  | 32 |
| 24  | -10 | 34  | 15   | -14 | 11  | -2  | 51   | 18 |
| 22  | -16 | 38  | 14   | -22 | 10  | -11 | 18   | 18 |
| 8   | -23 | 31  | 0    | -30 | -4  | -17 | 198  | 34 |
| 25  | -18 | 43  | 14   | -23 | 10  | -11 | -59  | 0  |
| 8   | -27 | 35  | 2    | -29 | -2  | -17 | 249  | 43 |
| 9   | -35 | 44  | 3    | -8  | -1  | -29 | -49  | 6  |
| 7   | -36 | 43  | 1    | -12 | -3  | -30 | -44  | 8  |
| 14  | -43 | 57  | 4    | -9  | 0   | -31 | 163  | 27 |
| 65  | -17 | 82  | 47   | -1  | 43  | 8   | 345  | 45 |
| -19 | -67 | 48  | -28  | -69 | -32 | -56 | 332  | 59 |
| -5  | -38 | 33  | -10  | -21 | -14 | -35 | 4    | 12 |
| 4   | -48 | 52  | -6   | -18 | -10 | -37 | 232  | 41 |
| -11 | -74 | 63  | -17  | -73 | -21 | -54 | 200  | 55 |
| 20  | -68 | 88  | 10   | -62 | 6   | -49 | 9    | 24 |
| 41  | -54 | 95  | 29   | -41 | 25  | -33 | -49  | 22 |
| -21 | -52 | 31  | -22  | -59 | -26 | -44 | 22   | 26 |
| 23  | -30 | 53  | 14   | -31 | 10  | -18 | -157 | 6  |
| 32  | -54 | 86  | 23   | -52 | 19  | -44 | -164 | 3  |
| 38  | -52 | 90  | 25   | -44 | 21  | -32 | -42  | 15 |
| 37  | -46 | 83  | 20   | -35 | 16  | -27 | 26   | 24 |
| 35  | -51 | 86  | 25   | -43 | 21  | -32 | -6   | 14 |
| 36  | -33 | 69  | 22   | -31 | 18  | -20 | 0    | 16 |
| 45  | -32 | 77  | 29   | -25 | 25  | -16 | -63  | 13 |
| 2   | -68 | 70  | -23  | -58 | -12 | -47 | 77   | 39 |
| 22  | -66 | 88  | 12   | -59 | 8   | -47 | 10   | 22 |
| 11  | -31 | 42  | -73  | -33 | -1  | -19 | 582  | 57 |
| 26  | -12 | 38  | -59  | -21 | 14  | -4  | 604  | 61 |
| 48  | -28 | 76  | 33   | -19 | 29  | -9  | 300  | 38 |
| 78  | 55  | 23  | -40  | 196 | 70  | 61  | 536  | 71 |
| -7  | -70 | 63  | -31  | -63 | -20 | -51 | 208  | 52 |
| -7  | -70 | 63  | -31  | -63 | -20 | -51 | 208  | 52 |
| 15  | -62 | 77  | -7   | -52 | 3   | -41 | 47   | 33 |
| 55  | -29 | 84  | 25   | -22 | 36  | -11 | -88  | 16 |
| 64  | -26 | 90  | 33   | -18 | 44  | -7  | -127 | 11 |
| 35  | -65 | 100 | 8    | -41 | 18  | -34 | -119 | 15 |
| 39  | -41 | 80  | 7    | -36 | 21  | -23 | -65  | 10 |

|     |     |     |      |     |     |     |      |     |
|-----|-----|-----|------|-----|-----|-----|------|-----|
| 15  | -1  | 16  | -129 | 109 | -3  | 10  | 189  | 28  |
| 36  | -6  | 42  | -50  | 121 | 9   | 9   | -145 | -7  |
| 36  | 15  | 21  | -61  | 138 | 26  | 27  | 19   | 4   |
| -9  | 15  | -24 | -57  | 7   | -4  | 15  | -128 | 1   |
| -1  | 20  | -21 | -114 | 109 | -3  | 23  | -15  | 8   |
| 10  | 3   | 7   | -63  | 7   | 3   | 7   | -116 | -14 |
| -6  | -24 | 18  | -39  | -38 | -20 | -13 | 71   | 25  |
| 1   | -12 | 13  | 1    | -3  | 1   | -10 | 86   | 10  |
| 27  | -6  | 33  | -45  | -17 | 7   | 7   | 48   | 9   |
| 4   | -16 | 20  | -148 | -6  | -1  | -13 | 99   | 10  |
| 2   | -15 | 17  | -3   | -3  | -3  | -9  | -56  | 2   |
| 2   | -28 | 30  | -156 | 22  | -7  | -21 | 377  | 33  |
| -1  | -9  | 8   | -144 | 30  | -4  | -6  | 208  | 29  |
| 22  | -17 | 39  | -144 | 0   | 8   | -8  | 198  | 17  |
| -31 | -9  | -22 | -15  | -31 | -12 | -14 | -194 | -15 |
| -29 | -17 | -12 | -80  | -29 | -18 | -16 | 13   | 11  |
| -33 | -13 | -20 | -78  | -33 | -18 | -17 | -160 | -10 |
| -22 | -29 | 7   | -19  | -36 | -12 | -24 | -65  | -2  |
| -19 | -21 | 2   | -16  | -36 | -10 | -22 | -193 | -11 |
| -21 | -26 | 5   | -14  | -31 | -14 | -22 | -82  | -2  |
| -13 | -30 | 17  | -7   | -31 | -7  | -23 | -209 | -10 |
| -7  | -14 | 7   | -8   | -17 | -8  | -13 | -38  | 2   |
| -9  | -20 | 11  | -10  | -19 | -10 | -17 | -29  | 2   |
| -5  | -22 | 17  | -9   | -21 | -9  | -19 | -35  | 2   |
| -9  | -23 | 14  | -10  | -19 | -10 | -19 | -25  | 6   |
| -13 | -29 | 16  | -15  | -24 | -15 | -26 | 0    | 10  |
| -12 | -31 | 19  | -13  | -55 | -13 | -28 | -59  | 6   |
| 4   | -27 | 31  | -4   | -23 | -4  | -24 | -125 | -4  |
| -24 | -37 | 13  | -23  | -38 | -23 | -36 | 49   | 13  |
| 3   | -28 | 31  | 1    | -52 | 1   | -25 | -210 | -11 |
| 8   | -34 | 42  | 5    | -54 | 5   | -29 | -222 | -13 |
| -34 | -23 | -11 | -160 | 8   | -26 | -23 | 347  | 49  |
| -29 | -24 | -5  | -23  | -24 | -23 | -23 | 163  | 24  |
| 2   | -8  | 10  | -1   | -5  | -1  | -5  | -9   | 0   |
| 2   | -8  | 10  | -1   | -5  | -1  | -5  | -9   | 0   |
| -6  | -5  | -1  | -6   | -7  | -6  | -4  | 12   | 1   |
| -35 | -34 | -1  | -169 | -34 | -31 | -34 | 357  | 46  |
| -17 | -26 | 9   | -160 | -22 | -16 | -24 | 158  | 17  |
| -17 | -19 | 2   | -155 | -18 | -15 | -17 | 161  | 16  |
| -18 | -21 | 3   | -156 | -18 | -16 | -18 | 160  | 16  |
| -18 | -21 | 3   | -156 | -18 | -16 | -18 | 160  | 16  |
| -6  | -18 | 12  | -7   | -12 | -7  | -14 | 17   | 4   |
| -9  | -18 | 9   | -9   | -13 | -9  | -13 | 14   | 6   |
| -8  | -21 | 13  | -24  | -17 | -10 | -20 | 43   | 4   |
| 5   | -14 | 19  | 1    | -7  | 1   | -11 | -113 | -12 |
| -16 | -32 | 16  | -32  | -26 | -17 | -30 | 113  | 11  |
| 15  | -20 | 35  | 7    | -36 | 7   | -14 | -127 | -5  |
| 15  | -20 | 35  | 7    | -36 | 7   | -14 | -127 | -5  |
| 0   | -35 | 35  | -7   | -51 | -7  | -28 | -64  | 4   |
| 0   | -35 | 35  | -7   | -51 | -7  | -28 | -64  | 4   |

|      |     |      |      |      |      |     |      |     |
|------|-----|------|------|------|------|-----|------|-----|
| 0    | -35 | 35   | -7   | -51  | -7   | -28 | -64  | 4   |
| -1   | -38 | 37   | -9   | -53  | -9   | -30 | -35  | 6   |
| -12  | -32 | 20   | -15  | -25  | -15  | -28 | 11   | 9   |
| -12  | -42 | 30   | -20  | -32  | -20  | -35 | 11   | 9   |
| 14   | -33 | 47   | 1    | -47  | 1    | -26 | -131 | -2  |
| -17  | -37 | 20   | -19  | -59  | -19  | -33 | -16  | 8   |
| -19  | -46 | 27   | -19  | -70  | -19  | -44 | -91  | 8   |
| -11  | -39 | 28   | -11  | -63  | -11  | -37 | -113 | 8   |
| -224 | 5   | -229 | -170 | -58  | -170 | -24 | -778 | -77 |
| -16  | -29 | 13   | -161 | -25  | -20  | -25 | 101  | 14  |
| 9    | -3  | 12   | 4    | 1    | 4    | 1   | -31  | 2   |
| -11  | -27 | 16   | -159 | -23  | -18  | -23 | 73   | 10  |
| 0    | -24 | 24   | -5   | -13  | -5   | -19 | -114 | -7  |
| -1   | -27 | 26   | -7   | -15  | -7   | -20 | -40  | 0   |
| -1   | -27 | 26   | -7   | -15  | -7   | -20 | -40  | 0   |
| -2   | -16 | 14   | -5   | -11  | -5   | -14 | -58  | -6  |
| 5    | -24 | 29   | -2   | -41  | -2   | -18 | 180  | 32  |
| -7   | -39 | 32   | -14  | -55  | -14  | -32 | 132  | 34  |
| 5    | -28 | 33   | -3   | -42  | -3   | -20 | 8    | 20  |
| -11  | -41 | 30   | -18  | -58  | -18  | -35 | 155  | 36  |
| 6    | -36 | 42   | -4   | -51  | -4   | -29 | -102 | 2   |
| -11  | -45 | 34   | -16  | -57  | -16  | -35 | 206  | 45  |
| -10  | -53 | 43   | -15  | -36  | -15  | -47 | -92  | 8   |
| -5   | -61 | 56   | -14  | -37  | -14  | -49 | 120  | 29  |
| 46   | -35 | 81   | 29   | -29  | 29   | -10 | 302  | 47  |
| -38  | -85 | 47   | -46  | -97  | -46  | -74 | 289  | 61  |
| -24  | -56 | 32   | -28  | -49  | -28  | -53 | -39  | 14  |
| -15  | -66 | 51   | -24  | -46  | -24  | -55 | 189  | 43  |
| -30  | -92 | 62   | -35  | -101 | -35  | -72 | 157  | 57  |
| 22   | -72 | 94   | 11   | -69  | 11   | -51 | -92  | 24  |
| -40  | -70 | 30   | -40  | -87  | -40  | -62 | -21  | 28  |
| 4    | -48 | 52   | -4   | -59  | -4   | -36 | -200 | 8   |
| 13   | -72 | 85   | 5    | -80  | 5    | -62 | -207 | 5   |
| 19   | -70 | 89   | 7    | -72  | 7    | -50 | -85  | 17  |
| 19   | -57 | 76   | 5    | -59  | 5    | -40 | -50  | 24  |
| 18   | -64 | 82   | 2    | -63  | 2    | -45 | -17  | 26  |
| 16   | -69 | 85   | 7    | -71  | 7    | -50 | -49  | 16  |
| 17   | -51 | 68   | 4    | -59  | 4    | -38 | -43  | 18  |
| 26   | -50 | 76   | 11   | -53  | 11   | -34 | -106 | 15  |
| -17  | -86 | 69   | -41  | -86  | -26  | -65 | 34   | 41  |
| 3    | -84 | 87   | -6   | -87  | -6   | -65 | -33  | 24  |
| -8   | -49 | 41   | -91  | -61  | -15  | -37 | 539  | 59  |
| 7    | -30 | 37   | -77  | -49  | 0    | -22 | 561  | 63  |
| 29   | -46 | 75   | 15   | -47  | 15   | -27 | 257  | 40  |
| -26  | -88 | 62   | -49  | -91  | -34  | -69 | 165  | 54  |
| -4   | -80 | 76   | -25  | -80  | -11  | -59 | 4    | 35  |
| 45   | -44 | 89   | 15   | -46  | 30   | -25 | -170 | 13  |
| -9   | -63 | 54   | -32  | -73  | -16  | -48 | 39   | 47  |
| 16   | -83 | 99   | -10  | -69  | 4    | -52 | -162 | 17  |
| 14   | -80 | 94   | -11  | -79  | 4    | -59 | -195 | 12  |

|     |     |     |     |     |     |     |      |     |
|-----|-----|-----|-----|-----|-----|-----|------|-----|
| 20  | -59 | 79  | -11 | -64 | 7   | -41 | -108 | 12  |
| 0   | -89 | 89  | -8  | -93 | -8  | -72 | -80  | 19  |
| 18  | -5  | 23  | -26 | 107 | 4   | 3   | 262  | 32  |
| 39  | -10 | 49  | 53  | 119 | 16  | 2   | -72  | -3  |
| 2   | 16  | -14 | -11 | 107 | 4   | 16  | 58   | 12  |
| 10  | -19 | 29  | 79  | -8  | 0   | -11 | 81   | 21  |
| 7   | -20 | 27  | -45 | -8  | 6   | -20 | 172  | 14  |
| 8   | -39 | 47  | 21  | 100 | -3  | -30 | 303  | 24  |
| -28 | -13 | -15 | 88  | -33 | -5  | -21 | -121 | -11 |
| -26 | -21 | -5  | 23  | -31 | -11 | -23 | 86   | 15  |
| -30 | -17 | -13 | 25  | -35 | -11 | -24 | -87  | -6  |
| -4  | -18 | 14  | 95  | -19 | -1  | -20 | 35   | 6   |
| -6  | -24 | 18  | 93  | -21 | -3  | -24 | 44   | 6   |
| -10 | -33 | 23  | 88  | -26 | -8  | -33 | 73   | 14  |
| 7   | -31 | 38  | 99  | -25 | 3   | -31 | -52  | 0   |
| -21 | -41 | 20  | 80  | -40 | -16 | -43 | 122  | 17  |
| 6   | -32 | 38  | 104 | -54 | 8   | -32 | -137 | -7  |
| -5  | -25 | 20  | 79  | -19 | -3  | -27 | 116  | 8   |
| 8   | -18 | 26  | 104 | -9  | 8   | -18 | -40  | -8  |
| 18  | -24 | 42  | 110 | -38 | 14  | -21 | -54  | -1  |
| 18  | -24 | 42  | 110 | -38 | 14  | -21 | -54  | -1  |
| 3   | -39 | 42  | 96  | -53 | 0   | -35 | 9    | 8   |
| 2   | -42 | 44  | 94  | -55 | -2  | -37 | 38   | 10  |
| -9  | -46 | 37  | 83  | -34 | -13 | -42 | 84   | 13  |
| 17  | -37 | 54  | 104 | -49 | 8   | -33 | -58  | 2   |
| -14 | -41 | 27  | 84  | -61 | -12 | -40 | 57   | 12  |
| -16 | -50 | 34  | 84  | -72 | -12 | -51 | -18  | 12  |
| -8  | -43 | 35  | 92  | -65 | -4  | -44 | -40  | 12  |
| -13 | -33 | 20  | -58 | -27 | -13 | -32 | 174  | 18  |
| 12  | -7  | 19  | 107 | -1  | 11  | -6  | 42   | 6   |
| -8  | -31 | 23  | -56 | -25 | -11 | -30 | 146  | 14  |
| 3   | -28 | 31  | 98  | -15 | 2   | -26 | -41  | -3  |
| 2   | -31 | 33  | 96  | -17 | 0   | -27 | 33   | 4   |
| 1   | -20 | 21  | 98  | -13 | 2   | -21 | 15   | -2  |
| 8   | -28 | 36  | 101 | -43 | 5   | -25 | 253  | 36  |
| 8   | -32 | 40  | 100 | -44 | 4   | -27 | 81   | 24  |
| -8  | -45 | 37  | 85  | -60 | -11 | -42 | 228  | 40  |
| 9   | -40 | 49  | 99  | -53 | 3   | -36 | -29  | 6   |
| -8  | -49 | 41  | 87  | -59 | -9  | -42 | 279  | 49  |
| -7  | -57 | 50  | 88  | -38 | -8  | -54 | -19  | 12  |
| -2  | -65 | 63  | 89  | -39 | -7  | -56 | 193  | 33  |
| 49  | -39 | 88  | 132 | -31 | 36  | -17 | 375  | 51  |
| -21 | -60 | 39  | 75  | -51 | -21 | -60 | 34   | 18  |
| -12 | -70 | 58  | 79  | -48 | -17 | -62 | 262  | 47  |
| 4   | -90 | 94  | 95  | -92 | -1  | -74 | 39   | 30  |
| 22  | -74 | 96  | 110 | -74 | 14  | -57 | -12  | 21  |
| 20  | -55 | 75  | 107 | -61 | 11  | -45 | 30   | 22  |
| 29  | -54 | 83  | 114 | -55 | 18  | -41 | -33  | 19  |
| -14 | -90 | 76  | 62  | -88 | -19 | -72 | 107  | 45  |
| 48  | -48 | 96  | 118 | -48 | 37  | -32 | -97  | 17  |

|     |     |     |      |     |     |     |     |     |
|-----|-----|-----|------|-----|-----|-----|-----|-----|
| 10  | 67  | -57 | -129 | 184 | -3  | 63  | 358 | 18  |
| 22  | 69  | -47 | -36  | 71  | 15  | 70  | 221 | -1  |
| 5   | 71  | -66 | -63  | 82  | 3   | 60  | 53  | -24 |
| 2   | 53  | -51 | -24  | 69  | -7  | 49  | 177 | 7   |
| -1  | 52  | -53 | -148 | 69  | -1  | 40  | 268 | 0   |
| -36 | 59  | -95 | -15  | 44  | -12 | 39  | -25 | -25 |
| -34 | 51  | -85 | -80  | 46  | -18 | 37  | 182 | 1   |
| -38 | 55  | -93 | -78  | 42  | -18 | 36  | 9   | -20 |
| -13 | 55  | -68 | -7   | 59  | -7  | 42  | 144 | -8  |
| -12 | 54  | -66 | -8   | 58  | -8  | 40  | 131 | -8  |
| -14 | 48  | -62 | -10  | 56  | -10 | 36  | 140 | -8  |
| -10 | 46  | -56 | -9   | 54  | -9  | 34  | 134 | -8  |
| -18 | 39  | -57 | -15  | 51  | -15 | 27  | 169 | 0   |
| -1  | 41  | -42 | -4   | 52  | -4  | 29  | 44  | -14 |
| -29 | 31  | -60 | -23  | 37  | -23 | 17  | 218 | 3   |
| -13 | 47  | -60 | -24  | 58  | -10 | 33  | 212 | -6  |
| 0   | 54  | -54 | 1    | 68  | 1   | 42  | 56  | -22 |
| 10  | 48  | -38 | 7    | 39  | 7   | 39  | 42  | -15 |
| 10  | 48  | -38 | 7    | 39  | 7   | 39  | 42  | -15 |
| -5  | 33  | -38 | -7   | 24  | -7  | 25  | 105 | -6  |
| -6  | 30  | -36 | -9   | 22  | -9  | 23  | 134 | -4  |
| -17 | 26  | -43 | -20  | 43  | -20 | 18  | 180 | -1  |
| 9   | 35  | -26 | 1    | 28  | 1   | 27  | 38  | -12 |
| -22 | 31  | -53 | -19  | 16  | -19 | 20  | 153 | -2  |
| -24 | 22  | -46 | -19  | 5   | -19 | 9   | 78  | -2  |
| -16 | 29  | -45 | -11  | 12  | -11 | 16  | 56  | -2  |
| -21 | 39  | -60 | -161 | 50  | -20 | 28  | 270 | 4   |
| 4   | 65  | -61 | 4    | 76  | 4   | 54  | 138 | -8  |
| -16 | 41  | -57 | -159 | 52  | -18 | 30  | 242 | 0   |
| -5  | 44  | -49 | -5   | 62  | -5  | 34  | 55  | -17 |
| -6  | 41  | -47 | -7   | 60  | -7  | 33  | 129 | -10 |
| -7  | 52  | -59 | -5   | 64  | -5  | 39  | 111 | -16 |
| 0   | 44  | -44 | -2   | 34  | -2  | 35  | 349 | 22  |
| 0   | 40  | -40 | -3   | 33  | -3  | 33  | 177 | 10  |
| -16 | 27  | -43 | -18  | 17  | -18 | 18  | 324 | 26  |
| -16 | 23  | -39 | -16  | 18  | -16 | 18  | 375 | 35  |
| -15 | 15  | -30 | -15  | 39  | -15 | 6   | 77  | -2  |
| -10 | 7   | -17 | -14  | 38  | -14 | 4   | 289 | 19  |
| 41  | 33  | 8   | 29   | 46  | 29  | 43  | 471 | 37  |
| -29 | 12  | -41 | -28  | 26  | -28 | 0   | 130 | 4   |
| -20 | 2   | -22 | -24  | 29  | -24 | -2  | 358 | 33  |
| -35 | -24 | -11 | -35  | -26 | -35 | -19 | 326 | 47  |
| 14  | -2  | 16  | 7    | 3   | 7   | 3   | 84  | 7   |
| 14  | 11  | 3   | 5    | 16  | 5   | 13  | 119 | 14  |
| 12  | 17  | -5  | 4    | 16  | 4   | 15  | 126 | 8   |
| 21  | 18  | 3   | 11   | 22  | 11  | 19  | 63  | 5   |
| -22 | -18 | -4  | -41  | -11 | -26 | -12 | 203 | 31  |
| -2  | -16 | 14  | -6   | -12 | -6  | -12 | 136 | 14  |
| -5  | -21 | 16  | -8   | -18 | -8  | -19 | 89  | 9   |
| 17  | 48  | -31 | 1    | 27  | 8   | 48  | 191 | 27  |



|     |     |     |      |     |     |    |      |     |
|-----|-----|-----|------|-----|-----|----|------|-----|
| 50  | 66  | -16 | -5   | 48  | 35  | 68 | 168  | 11  |
| 25  | 57  | -32 | 37   | 62  | 25  | 52 | 64   | 4   |
| -10 | 59  | -69 | -38  | 32  | 10  | 44 | -40  | -8  |
| 4   | 51  | -47 | 24   | 29  | 18  | 39 | -73  | -9  |
| 16  | 58  | -42 | 32   | 48  | 20  | 48 | 82   | 4   |
| 14  | 52  | -38 | 30   | 46  | 18  | 44 | 91   | 4   |
| 18  | 50  | -32 | 31   | 44  | 19  | 42 | 85   | 4   |
| 14  | 49  | -35 | 30   | 46  | 18  | 42 | 95   | 8   |
| 10  | 43  | -33 | 25   | 41  | 13  | 35 | 120  | 12  |
| 27  | 45  | -18 | 36   | 42  | 24  | 37 | -5   | -2  |
| -1  | 35  | -36 | 17   | 27  | 5   | 25 | 169  | 15  |
| 25  | 64  | -39 | 39   | 60  | 27  | 56 | 111  | 2   |
| 15  | 51  | -36 | 16   | 48  | 18  | 41 | 163  | 6   |
| 28  | 58  | -30 | 41   | 58  | 29  | 50 | 7    | -10 |
| 38  | 52  | -14 | 47   | 29  | 35  | 47 | -7   | -3  |
| 38  | 52  | -14 | 47   | 29  | 35  | 47 | -7   | -3  |
| 23  | 37  | -14 | 33   | 14  | 21  | 33 | 56   | 6   |
| 37  | 39  | -2  | 41   | 18  | 29  | 35 | -11  | 0   |
| 6   | 35  | -29 | 21   | 6   | 9   | 28 | 104  | 10  |
| 7   | 43  | -36 | -121 | 40  | 8   | 36 | 221  | 16  |
| 32  | 69  | -37 | 44   | 66  | 32  | 62 | 89   | 4   |
| 23  | 48  | -25 | 35   | 52  | 23  | 42 | 6    | -5  |
| 22  | 45  | -23 | 33   | 50  | 21  | 41 | 80   | 2   |
| 21  | 56  | -35 | 35   | 54  | 23  | 47 | 62   | -4  |
| 28  | 48  | -20 | 38   | 24  | 26  | 43 | 300  | 34  |
| 12  | 31  | -19 | 22   | 7   | 10  | 26 | 275  | 38  |
| 18  | 11  | 7   | 26   | 28  | 14  | 12 | 240  | 31  |
| 40  | 21  | 19  | 44   | 6   | 32  | 23 | 77   | 20  |
| 49  | 22  | 27  | 51   | 12  | 39  | 27 | 14   | 17  |
| 26  | -12 | 38  | 34   | -22 | 22  | -4 | 87   | 26  |
| 30  | 42  | -12 | -37  | 16  | 28  | 39 | 681  | 65  |
| 52  | 26  | 26  | 55   | 18  | 43  | 34 | 377  | 42  |
| 19  | -8  | 27  | 15   | -15 | 17  | 2  | 124  | 37  |
| 39  | -11 | 50  | 30   | -4  | 32  | 9  | -42  | 19  |
| -2  | 58  | -60 | -13  | 40  | -8  | 45 | 83   | -8  |
| 6   | 67  | -61 | 23   | 75  | 9   | 49 | -44  | -31 |
| 26  | 65  | -39 | -118 | 78  | 20  | 50 | 210  | -16 |
| -29 | 69  | -98 | -52  | 45  | -6  | 41 | -148 | -43 |
| -15 | 61  | -76 | 10   | 42  | 2   | 36 | -181 | -44 |
| -3  | 68  | -71 | 18   | 61  | 4   | 45 | -26  | -31 |
| -9  | 53  | -62 | 11   | 54  | -3  | 32 | 12   | -23 |
| -20 | 45  | -65 | 3    | 40  | -11 | 22 | 61   | -20 |
| 6   | 74  | -68 | 25   | 73  | 11  | 53 | 3    | -33 |
| -4  | 61  | -65 | 2    | 61  | 2   | 38 | 55   | -29 |
| 19  | 62  | -43 | 33   | 42  | 19  | 44 | -115 | -38 |
| 4   | 47  | -43 | 19   | 27  | 5   | 30 | -52  | -29 |
| 18  | 49  | -31 | 27   | 31  | 13  | 32 | -119 | -35 |
| -13 | 45  | -58 | 7    | 19  | -7  | 25 | -4   | -25 |
| -12 | 53  | -65 | -135 | 53  | -8  | 33 | 113  | -19 |
| 3   | 55  | -52 | 19   | 63  | 5   | 38 | -28  | -33 |

|     |     |     |      |     |     |     |      |     |
|-----|-----|-----|------|-----|-----|-----|------|-----|
| 2   | 66  | -64 | 21   | 67  | 7   | 44  | -46  | -39 |
| 9   | 58  | -49 | 24   | 37  | 10  | 40  | 192  | -1  |
| -7  | 41  | -48 | 8    | 20  | -6  | 23  | 167  | 3   |
| -1  | 21  | -22 | 12   | 41  | -2  | 9   | 132  | -4  |
| 21  | 31  | -10 | 30   | 19  | 16  | 20  | -31  | -15 |
| 30  | 32  | -2  | 37   | 25  | 23  | 24  | -94  | -18 |
| 7   | -2  | 9   | 20   | -9  | 6   | -7  | -21  | -9  |
| 11  | 52  | -41 | -51  | 29  | 12  | 36  | 573  | 30  |
| 0   | 2   | -2  | 1    | -2  | 1   | -1  | 16   | 2   |
| 20  | -1  | 21  | 16   | 9   | 16  | 6   | -150 | -16 |
| 27  | 23  | 4   | -108 | 36  | 12  | 29  | -44  | -10 |
| 22  | 31  | -9  | -74  | 40  | 12  | 37  | -53  | -4  |
| 34  | 17  | 17  | -111 | 137 | 11  | 28  | 232  | 26  |
| 54  | 18  | 36  | -19  | 19  | 29  | 32  | 60   | 4   |
| 27  | -5  | 32  | -134 | 18  | 13  | 1   | 362  | 25  |
| 60  | 37  | 23  | -58  | 171 | 45  | 49  | 35   | 0   |
| 3   | 5   | -2  | -135 | 11  | 0   | 4   | 148  | 10  |
| 21  | 15  | 6   | -85  | 32  | 14  | 21  | 77   | -4  |
| 15  | 16  | -1  | 14   | 25  | 10  | 17  | 51   | -1  |
| 5   | 13  | -8  | 3    | 16  | 2   | 15  | 69   | -1  |
| 69  | -5  | 74  | -119 | 167 | 46  | 11  | -189 | -17 |
| -40 | -6  | -34 | -136 | 45  | -38 | 0   | 185  | 13  |
| 0   | 24  | -24 | -108 | 26  | -4  | 29  | -29  | -6  |
| -20 | 12  | -32 | -124 | 68  | -19 | 14  | 328  | 35  |
| -10 | 1   | -11 | -62  | -1  | -4  | 2   | 56   | 9   |
| -12 | -8  | -4  | 3    | -6  | 2   | 0   | -135 | -16 |
| -4  | -3  | -1  | 0    | -5  | 3   | -1  | -101 | -13 |
| 0   | -5  | 5   | 0    | -8  | 2   | -5  | -139 | -11 |
| -8  | -22 | 14  | -72  | -18 | -2  | -20 | 12   | 7   |
| 19  | -5  | 24  | 14   | 5   | 10  | -2  | -68  | -7  |
| 0   | -5  | 5   | -140 | 8   | -3  | -2  | 210  | 15  |
| 16  | -22 | 38  | 7    | 3   | 3   | -15 | 44   | 6   |
| 24  | -7  | 31  | 19   | -20 | 15  | -5  | -174 | -14 |
| 12  | -20 | 32  | 4    | -26 | 0   | -14 | 154  | 30  |
| 24  | -18 | 42  | 13   | -24 | 9   | -12 | -50  | 1   |
| 30  | 2   | 28  | 19   | 20  | 15  | 4   | 163  | 32  |
| -39 | -79 | 40  | -46  | -53 | -50 | -66 | 789  | 107 |
| -15 | -70 | 55  | -25  | -68 | -29 | -56 | 449  | 74  |
| 68  | 20  | 48  | -21  | 19  | 52  | 32  | 516  | 51  |
| -6  | -40 | 34  | -4   | -25 | -8  | -40 | -111 | 0   |
| 24  | -55 | 79  | 13   | -48 | 9   | -38 | 140  | 48  |
| 6   | -11 | 17  | 3    | 4   | -1  | -8  | 43   | 8   |
| -5  | -46 | 41  | -10  | -22 | -14 | -39 | 130  | 23  |
| -32 | -53 | 21  | -26  | -64 | -30 | -48 | 34   | 17  |
| 16  | -47 | 63  | 5    | -44 | 1   | -33 | 80   | 34  |
| -22 | -41 | 19  | -18  | -56 | -22 | -39 | 82   | 17  |
| -15 | -59 | 44  | -21  | -32 | -25 | -48 | 389  | 53  |
| 47  | -27 | 74  | 20   | -23 | 31  | -15 | -47  | 15  |
| 5   | -25 | 30  | -76  | -37 | -5  | -20 | 610  | 62  |
| 27  | -56 | 83  | 7    | -59 | 16  | -44 | -114 | 12  |

|     |     |      |      |     |     |     |      |     |
|-----|-----|------|------|-----|-----|-----|------|-----|
| 4   | -64 | 68   | -1   | -63 | -5  | -50 | 47   | 29  |
| 21  | -30 | 51   | 12   | -34 | 8   | -22 | -177 | -3  |
| -6  | -40 | 34   | -4   | -25 | -8  | -40 | -111 | 0   |
| 23  | -37 | 60   | 12   | -36 | 8   | -25 | -47  | 18  |
| 8   | -4  | 12   | 14   | 3   | 10  | -1  | -139 | -15 |
| 19  | -1  | 20   | -148 | 15  | 3   | 2   | 501  | 40  |
| 52  | 41  | 11   | -72  | 168 | 35  | 50  | 174  | 15  |
| 13  | 19  | -6   | -99  | 29  | 4   | 22  | 216  | 11  |
| 7   | 20  | -13  | 0    | 22  | 0   | 18  | 190  | 14  |
| -48 | -2  | -46  | -150 | 42  | -48 | 1   | 324  | 28  |
| -18 | 5   | -23  | -76  | -4  | -14 | 3   | 195  | 24  |
| -12 | 1   | -13  | -14  | -8  | -7  | 0   | 38   | 2   |
| 11  | -1  | 12   | 0    | 2   | 0   | -1  | 71   | 8   |
| 4   | -16 | 20   | -10  | -29 | -10 | -13 | 293  | 45  |
| -47 | -75 | 28   | -60  | -56 | -60 | -65 | 928  | 122 |
| 13  | -26 | 39   | -2   | -37 | -2  | -21 | -38  | 12  |
| -40 | -49 | 9    | -40  | -67 | -40 | -47 | 173  | 32  |
| -23 | -55 | 32   | -35  | -35 | -35 | -47 | 528  | 68  |
| -3  | -21 | 18   | -90  | -40 | -15 | -19 | 749  | 77  |
| -4  | -60 | 56   | -15  | -66 | -15 | -49 | 186  | 44  |
| -14 | -36 | 22   | -18  | -28 | -18 | -39 | 28   | 15  |
| 0   | 0   | 0    | 0    | 0   | 0   | 0   | 0    | 0   |
| 12  | 33  | -21  | -113 | 26  | 11  | 32  | -27  | -8  |
| 7   | 41  | -34  | -79  | 30  | 11  | 40  | -36  | -2  |
| 19  | 27  | -8   | -116 | 127 | 10  | 31  | 249  | 28  |
| 39  | 28  | 11   | -24  | 9   | 28  | 35  | 77   | 6   |
| -8  | 57  | -65  | -93  | 60  | 8   | 51  | 37   | 9   |
| 12  | 5   | 7    | -139 | 8   | 12  | 4   | 379  | 27  |
| -3  | 40  | -43  | -107 | 108 | 6   | 38  | 104  | 15  |
| -35 | 22  | -57  | -129 | 58  | -20 | 17  | 345  | 37  |
| -19 | 7   | -26  | -5   | -15 | 2   | 2   | -84  | -11 |
| -23 | -12 | -11  | -77  | -28 | -3  | -17 | 29   | 9   |
| 4   | 5   | -1   | 9    | -5  | 9   | 1   | -51  | -5  |
| 9   | 3   | 6    | 14   | -30 | 14  | -2  | -157 | -12 |
| -3  | -10 | 7    | -1   | -36 | -1  | -11 | 171  | 32  |
| -30 | -60 | 30   | -30  | -78 | -30 | -53 | 466  | 76  |
| 53  | 30  | 23   | -26  | 9   | 51  | 35  | 533  | 53  |
| -21 | -30 | 9    | -9   | -35 | -9  | -37 | -94  | 2   |
| -11 | -54 | 43   | -6   | -73 | -6  | -47 | 64   | 31  |
| 1   | -37 | 38   | 0    | -54 | 0   | -30 | 97   | 36  |
| -30 | -49 | 19   | -26  | -42 | -26 | -45 | 406  | 55  |
| 19  | -46 | 65   | 18   | -53 | 18  | -33 | -7   | 28  |
| -26 | 30  | -56  | -64  | 45  | -23 | 24  | -570 | -69 |
| -31 | 38  | -69  | -30  | 49  | -23 | 32  | -579 | -63 |
| -46 | 54  | -100 | -44  | 79  | -26 | 43  | -506 | -52 |
| -26 | 2   | -28  | -90  | 27  | -22 | -4  | -164 | -34 |
| 7   | 44  | -37  | -14  | 180 | 10  | 44  | -491 | -59 |
| -50 | 12  | -62  | -91  | 20  | -35 | -1  | -378 | -49 |
| -32 | 22  | -54  | -41  | 41  | -21 | 16  | -449 | -63 |
| -38 | 23  | -61  | 58   | 34  | -25 | 12  | -475 | -60 |

|     |     |     |      |     |     |     |      |     |
|-----|-----|-----|------|-----|-----|-----|------|-----|
| -48 | 20  | -68 | 47   | 25  | -33 | 10  | -457 | -60 |
| -93 | 1   | -94 | -92  | 54  | -73 | -5  | -341 | -46 |
| -63 | 8   | -71 | -18  | 8   | -39 | -3  | -470 | -50 |
| -57 | 4   | -61 | 44   | 4   | -32 | -6  | -627 | -72 |
| -53 | 2   | -55 | -96  | 17  | -38 | -7  | -316 | -44 |
| -41 | -13 | -28 | 48   | -17 | -35 | -19 | -372 | -29 |
| -29 | -11 | -18 | 57   | -15 | -26 | -17 | -576 | -58 |
| -23 | 9   | -32 | 63   | 29  | -20 | -1  | -363 | -27 |
| -92 | -72 | -20 | -2   | -44 | -85 | -71 | 263  | 48  |
| -68 | -63 | -5  | 19   | -59 | -64 | -61 | -77  | 15  |
| 15  | 27  | -12 | 23   | 28  | 17  | 27  | -10  | -8  |
| -59 | -33 | -26 | 40   | -16 | -43 | -45 | -637 | -59 |
| -29 | -48 | 19  | 57   | -39 | -26 | -43 | -386 | -11 |
| -47 | -4  | -43 | 47   | 13  | -36 | -13 | -483 | -51 |
| -49 | -57 | 8   | 43   | -54 | -40 | -55 | -479 | -30 |
| -58 | -39 | -19 | 34   | -13 | -49 | -44 | -396 | -36 |
| -85 | -46 | -39 | 18   | -55 | -65 | -53 | -492 | -42 |
| -37 | -40 | 3   | 49   | -35 | -34 | -38 | -446 | -25 |
| -68 | -52 | -16 | 23   | -23 | -60 | -53 | -137 | -6  |
| -48 | -18 | -30 | -32  | -28 | -40 | -25 | 84   | 3   |
| -42 | -24 | -18 | -29  | -24 | -36 | -24 | 56   | -2  |
| -27 | -5  | -22 | -15  | -12 | -21 | -10 | 86   | 4   |
| -49 | -57 | 8   | 43   | -54 | -40 | -55 | -479 | -30 |
| -32 | -23 | -9  | 56   | -25 | -27 | -27 | -703 | -62 |
| -19 | -49 | 30  | 67   | -34 | -16 | -41 | -550 | -33 |
| -59 | -33 | -26 | 40   | -16 | -43 | -45 | -637 | -59 |
| -31 | -49 | 18  | 54   | -39 | -29 | -43 | -367 | -6  |
| -35 | 9   | -44 | -53  | 143 | -27 | -2  | -454 | -34 |
| -5  | -29 | 24  | 74   | -16 | -9  | -23 | -602 | -55 |
| -19 | 21  | -40 | -104 | 39  | -14 | 25  | -98  | -23 |
| 13  | 8   | 5   | -49  | 18  | 3   | 20  | 15   | -15 |
| -14 | -15 | 1   | -164 | 17  | -13 | -11 | 317  | 6   |
| -20 | 5   | -25 | -115 | 31  | -12 | 9   | 32   | -23 |
| -26 | 6   | -32 | -16  | 24  | -16 | 5   | 6    | -20 |
| 28  | -15 | 43  | -149 | 166 | 20  | -1  | -234 | -36 |
| -81 | -16 | -65 | -166 | 44  | -64 | -12 | 140  | -6  |
| -51 | -9  | -42 | -92  | -2  | -30 | -10 | 11   | -10 |
| -45 | -13 | -32 | -30  | -6  | -23 | -13 | -146 | -32 |
| -22 | -15 | -7  | -16  | 4   | -16 | -14 | -113 | -26 |
| -29 | -30 | 1   | -26  | -27 | -26 | -26 | 109  | 11  |
| -11 | -8  | -3  | -11  | 19  | -11 | -8  | 118  | 13  |
| -80 | -89 | 9   | -76  | -54 | -76 | -78 | 744  | 88  |
| -73 | -63 | -10 | -56  | -65 | -56 | -60 | -11  | -2  |
| -56 | -69 | 13  | -51  | -33 | -51 | -60 | 344  | 34  |
| 6   | -37 | 43  | -10  | -24 | 5   | -27 | -92  | -4  |
| -36 | -35 | -1  | -106 | -38 | -31 | -32 | 565  | 43  |
| -37 | -74 | 37  | -31  | -64 | -31 | -62 | 2    | 10  |
| -20 | -40 | 20  | -18  | -35 | -18 | -34 | -222 | -22 |
| -47 | -50 | 3   | -34  | -26 | -34 | -52 | -156 | -19 |
| -19 | 51  | -70 | -109 | 87  | -8  | 50  | 218  | 22  |

|     |     |     |      |     |     |     |      |     |
|-----|-----|-----|------|-----|-----|-----|------|-----|
| 1   | -1  | 2   | -155 | 35  | -4  | 3   | 560  | 40  |
| -5  | 19  | -24 | -106 | 49  | -3  | 23  | 275  | 11  |
| -66 | -2  | -64 | -157 | 62  | -55 | 2   | 383  | 28  |
| -14 | 34  | -48 | -123 | 135 | -10 | 37  | 285  | 28  |
| -30 | 1   | -31 | -21  | 12  | -14 | 1   | 97   | 2   |
| -34 | -18 | -16 | -93  | -1  | -19 | -18 | 210  | 22  |
| -2  | -3  | 1   | -2   | -3  | -2  | -3  | 24   | 1   |
| -14 | -16 | 2   | -17  | -9  | -17 | -12 | 352  | 45  |
| -32 | -36 | 4   | -25  | -8  | -25 | -38 | 87   | 15  |
| -10 | -43 | 33  | -16  | -27 | -16 | -31 | 278  | 49  |
| -41 | -55 | 14  | -42  | -15 | -42 | -46 | 587  | 68  |
| 8   | -52 | 60  | 2    | -26 | 2   | -34 | 174  | 41  |
| 2   | 44  | -42 | 47   | 58  | 9   | 45  | -222 | -15 |
| 12  | -10 | 22  | 115  | -23 | -5  | 1   | -170 | -6  |
| 41  | 16  | 25  | 117  | 12  | 29  | 32  | -147 | -15 |
| 14  | 5   | 9   | 33   | 7   | 9   | 4   | -136 | -19 |
| 16  | 12  | 4   | 50   | 20  | 14  | 18  | -165 | -26 |
| 10  | 13  | -3  | 149  | 13  | 10  | 14  | -191 | -23 |
| 0   | 10  | -10 | 138  | 4   | 2   | 12  | -173 | -23 |
| -5  | 21  | -26 | 27   | 14  | -4  | 26  | -271 | -28 |
| -9  | -6  | -3  | 135  | -17 | 3   | -4  | -343 | -35 |
| -13 | -25 | 12  | 63   | -30 | -2  | -23 | -230 | -15 |
| -5  | -8  | 3   | -5   | -4  | -3  | -5  | -32  | -7  |
| 11  | -25 | 36  | 142  | -9  | 3   | -18 | -198 | -16 |
| 12  | -4  | 16  | 133  | 3   | 9   | -2  | -202 | -27 |
| 7   | -23 | 30  | 139  | -38 | 0   | -17 | -88  | 8   |
| -11 | -43 | 32  | 131  | -37 | -8  | -43 | -353 | -22 |
| 2   | -16 | 18  | 140  | -39 | 1   | -13 | -258 | -18 |
| -1  | -67 | 66  | 134  | -75 | -5  | -53 | -195 | 7   |
| 1   | -50 | 51  | 130  | -60 | -9  | -38 | -51  | 19  |
| -8  | -48 | 40  | 127  | -61 | -12 | -39 | -268 | -5  |
| 16  | -30 | 46  | 147  | -54 | 8   | -21 | -403 | -20 |
| -1  | -67 | 66  | 134  | -75 | -5  | -53 | -195 | 7   |
| 60  | 60  | 0   | 98   | 173 | 60  | 62  | -382 | -14 |
| 29  | -27 | 56  | 164  | -41 | 25  | -21 | -418 | -31 |
| -29 | 27  | -56 | -164 | 41  | -25 | 21  | 418  | 31  |

| bio14ED | bio15ED | bio16ED | bio17ED | bio18ED | bio19ED |
|---------|---------|---------|---------|---------|---------|
| 7       | -1      | 71      | 47      | -35     | 100     |
| -10     | -1      | -37     | -15     | -97     | -8      |
| -2      | -4      | -1      | 33      | -49     | 22      |
| -4      | -1      | -17     | -5      | -57     | -11     |
| 5       | -2      | 16      | 26      | -56     | 41      |
| 1       | -10     | -41     | 6       | -51     | -13     |
| 8       | 1       | 35      | 29      | 22      | 6       |
| 4       | 2       | 20      | 15      | 11      | -9      |
| 15      | -6      | 11      | 42      | 13      | 36      |
| 7       | -4      | 2       | 46      | -24     | 30      |
| -2      | -1      | -4      | 6       | -2      | 8       |
| 36      | -8      | 102     | 120     | 83      | 133     |
| 24      | -8      | 47      | 79      | 43      | 75      |
| -12     | 1       | -45     | -33     | -50     | -62     |
| -2      | 3       | 25      | 2       | -4      | 6       |
| -9      | 0       | -38     | -26     | -43     | -52     |
| -6      | 4       | 0       | -13     | -13     | -5      |
| -10     | 2       | -40     | -32     | -52     | -36     |
| 0       | -2      | -13     | -2      | -11     | -9      |
| -5      | -2      | -15     | -9      | -13     | -23     |
| -17     | 6       | -27     | -43     | -25     | -54     |
| -1      | -2      | 9       | 4       | 11      | -10     |
| 3       | -3      | 10      | 16      | 12      | 0       |
| -1      | -1      | 9       | 5       | 11      | -6      |
| 6       | -2      | 16      | 16      | 18      | 1       |
| 6       | -1      | 25      | 20      | 27      | 6       |
| -6      | 0       | -11     | -12     | -9      | -32     |
| 12      | -5      | 27      | 46      | 29      | 18      |
| -13     | 4       | -32     | -32     | -30     | -55     |
| 34      | -5      | 104     | 109     | 83      | 142     |
| 20      | -5      | 55      | 70      | 57      | 90      |
| 5       | -5      | 7       | 22      | 9       | 10      |
| 5       | -5      | 7       | 22      | 9       | 10      |
| 3       | -5      | 4       | 24      | 6       | 18      |
| 27      | -3      | 119     | 117     | 56      | 152     |
| 17      | -7      | 38      | 65      | 27      | 73      |
| 19      | -7      | 36      | 65      | 36      | 72      |
| 19      | -7      | 36      | 65      | 36      | 72      |
| 8       | -5      | 11      | 26      | 13      | 19      |
| 10      | -8      | 1       | 39      | 0       | 35      |
| -2      | -6      | -28     | -3      | -26     | -18     |
| 14      | -7      | 29      | 50      | 28      | 46      |
| -4      | -2      | -22     | -7      | -20     | -35     |
| -4      | -2      | -22     | -7      | -20     | -35     |
| -1      | -2      | -2      | 6       | 0       | -17     |
| -1      | -2      | -2      | 6       | 0       | -17     |
| -1      | -2      | -2      | 6       | 0       | -17     |
| 1       | -3      | 3       | 15      | 5       | -7      |
| 7       | -3      | 20      | 22      | 22      | 9       |

|     |    |     |     |     |     |
|-----|----|-----|-----|-----|-----|
| 6   | -4 | 11  | 27  | 13  | 11  |
| -5  | -1 | -20 | -6  | -18 | -31 |
| 7   | -3 | 13  | 24  | 15  | -2  |
| -4  | 6  | 18  | -9  | 20  | -38 |
| -6  | 7  | 13  | -16 | 15  | -46 |
| 11  | -6 | 27  | 48  | 22  | 64  |
| 4   | -3 | 12  | 14  | 14  | -4  |
| 9   | -6 | 17  | 42  | 17  | 55  |
| 0   | -4 | -20 | -3  | -18 | -15 |
| 5   | -5 | -1  | 16  | 1   | 6   |
| 5   | -5 | -1  | 16  | 1   | 6   |
| 2   | -6 | -12 | 10  | -10 | 2   |
| 17  | 0  | 79  | 61  | 81  | 32  |
| 10  | 7  | 95  | 32  | 97  | 6   |
| 3   | 6  | 44  | 8   | 46  | -19 |
| -1  | 11 | 51  | -2  | 53  | -32 |
| 12  | 7  | 102 | 38  | 104 | 12  |
| -2  | -1 | -5  | 1   | -3  | -24 |
| 11  | 11 | 138 | 36  | 140 | 6   |
| -5  | 7  | 20  | -12 | 22  | -29 |
| -5  | 7  | 22  | -12 | 24  | -29 |
| 11  | 3  | 72  | 36  | 74  | 40  |
| 9   | 4  | 110 | 44  | 112 | 12  |
| 12  | 13 | 178 | 46  | 180 | 13  |
| -1  | 5  | 33  | 2   | 35  | -16 |
| 13  | 7  | 119 | 52  | 121 | 32  |
| 1   | 19 | 148 | 15  | 150 | -12 |
| -7  | 17 | 71  | -17 | 73  | -43 |
| -15 | 25 | 66  | -40 | 68  | -72 |
| -7  | 21 | 87  | -24 | 89  | -51 |
| -19 | 26 | 22  | -60 | 24  | -93 |
| -17 | 18 | 1   | -49 | 3   | -79 |
| -8  | 16 | 46  | -25 | 48  | -48 |
| -3  | 12 | 53  | -11 | 55  | -36 |
| -3  | 9  | 38  | -7  | 40  | -27 |
| -4  | 13 | 55  | -13 | 57  | -41 |
| -10 | 15 | 32  | -33 | 34  | -61 |
| -5  | 19 | 90  | -16 | 88  | -50 |
| -5  | 15 | 65  | -13 | 67  | -38 |
| 29  | 0  | 168 | 99  | 156 | 75  |
| 41  | -3 | 187 | 121 | 125 | 112 |
| 7   | 7  | 114 | 24  | 116 | 7   |
| 29  | 5  | 209 | 112 | 30  | 155 |
| 8   | 12 | 117 | 23  | 115 | -5  |
| 8   | 12 | 117 | 23  | 115 | -5  |
| -2  | 17 | 81  | -8  | 79  | -31 |
| -8  | 12 | 16  | -22 | 5   | -42 |
| -10 | 12 | 1   | -29 | -9  | -49 |
| -17 | 26 | 39  | -51 | 34  | -82 |
| -3  | 8  | 17  | -6  | -12 | -37 |

|     |    |     |     |      |     |
|-----|----|-----|-----|------|-----|
| 3   | 4  | 66  | 26  | -42  | 87  |
| -14 | 4  | -42 | -36 | -104 | -21 |
| -6  | 1  | -6  | 12  | -56  | 9   |
| -8  | 4  | -22 | -26 | -64  | -24 |
| 1   | 3  | 11  | 5   | -63  | 28  |
| -3  | -5 | -46 | -15 | -58  | -26 |
| 4   | 6  | 30  | 8   | 15   | -7  |
| 11  | -1 | 6   | 21  | 6    | 23  |
| 3   | 1  | -3  | 25  | -31  | 17  |
| 9   | 0  | 11  | 28  | 8    | 47  |
| -6  | 4  | -9  | -15 | -9   | -5  |
| 32  | -3 | 97  | 99  | 76   | 120 |
| 16  | -1 | 69  | 60  | 15   | 95  |
| 20  | -3 | 42  | 58  | 36   | 62  |
| -16 | 6  | -50 | -54 | -57  | -75 |
| -6  | 8  | 20  | -19 | -11  | -7  |
| -13 | 5  | -43 | -47 | -50  | -65 |
| -10 | 9  | -5  | -34 | -20  | -18 |
| -14 | 7  | -45 | -53 | -59  | -49 |
| -4  | 3  | -18 | -23 | -18  | -22 |
| -21 | 11 | -32 | -64 | -32  | -67 |
| -5  | 3  | 4   | -17 | 4    | -23 |
| -1  | 2  | 5   | -5  | 5    | -13 |
| -5  | 4  | 4   | -16 | 4    | -19 |
| 2   | 3  | 11  | -5  | 11   | -12 |
| 2   | 4  | 20  | -1  | 20   | -7  |
| -1  | 3  | 0   | -7  | 0    | -29 |
| -10 | 5  | -16 | -33 | -16  | -45 |
| 8   | 0  | 22  | 25  | 22   | 5   |
| -17 | 9  | -37 | -53 | -37  | -68 |
| -17 | 8  | -41 | -54 | -41  | -70 |
| 30  | 0  | 99  | 88  | 76   | 129 |
| 12  | 1  | 40  | 38  | 40   | 68  |
| 1   | 0  | 2   | 1   | 2    | -3  |
| 1   | 0  | 2   | 1   | 2    | -3  |
| -1  | 0  | -1  | 3   | -1   | 5   |
| 23  | 2  | 114 | 96  | 49   | 139 |
| 13  | -2 | 33  | 44  | 20   | 60  |
| 14  | -2 | 33  | 44  | 28   | 61  |
| 15  | -2 | 31  | 44  | 29   | 59  |
| 15  | -2 | 31  | 44  | 29   | 59  |
| 4   | 0  | 6   | 5   | 6    | 6   |
| 5   | 0  | 11  | 5   | 11   | 4   |
| 6   | -3 | -4  | 18  | -7   | 22  |
| -6  | -1 | -33 | -24 | -33  | -31 |
| 10  | -2 | 24  | 29  | 21   | 33  |
| -8  | 3  | -27 | -28 | -27  | -48 |
| -8  | 3  | -27 | -28 | -27  | -48 |
| -5  | 3  | -7  | -15 | -7   | -30 |
| -5  | 3  | -7  | -15 | -7   | -30 |



|     |     |      |      |      |      |
|-----|-----|------|------|------|------|
| -5  | 3   | -7   | -15  | -7   | -30  |
| -3  | 2   | -2   | -6   | -2   | -20  |
| 3   | 2   | 15   | 1    | 15   | -4   |
| 2   | 1   | 6    | 6    | 6    | -2   |
| -9  | 4   | -25  | -27  | -25  | -44  |
| 3   | 2   | 8    | 3    | 8    | -15  |
| -8  | 11  | 13   | -30  | 13   | -51  |
| -10 | 12  | 8    | -37  | 8    | -59  |
| -48 | -14 | -226 | -158 | -226 | -187 |
| 7   | -1  | 22   | 27   | 15   | 51   |
| 0   | 2   | 7    | -7   | 7    | -17  |
| 5   | -1  | 12   | 21   | 10   | 42   |
| -4  | 1   | -25  | -24  | -25  | -28  |
| 1   | 0   | -6   | -5   | -6   | -7   |
| 1   | 0   | -6   | -5   | -6   | -7   |
| -2  | -1  | -17  | -11  | -17  | -11  |
| 13  | 5   | 74   | 40   | 74   | 19   |
| 6   | 12  | 90   | 11   | 90   | -7   |
| -1  | 11  | 39   | -13  | 39   | -32  |
| 8   | 12  | 97   | 17   | 97   | -1   |
| -6  | 4   | -10  | -20  | -10  | -37  |
| 7   | 16  | 133  | 15   | 133  | -7   |
| -9  | 12  | 15   | -33  | 15   | -42  |
| 7   | 8   | 67   | 15   | 67   | 27   |
| 5   | 9   | 105  | 23   | 105  | -1   |
| 8   | 18  | 173  | 25   | 173  | 0    |
| -5  | 10  | 28   | -19  | 28   | -29  |
| 9   | 12  | 114  | 31   | 114  | 19   |
| -3  | 24  | 143  | -6   | 143  | -25  |
| -19 | 30  | 61   | -61  | 61   | -85  |
| -11 | 26  | 82   | -45  | 82   | -64  |
| -23 | 31  | 17   | -81  | 17   | -106 |
| -21 | 23  | -4   | -70  | -4   | -92  |
| -12 | 21  | 41   | -46  | 41   | -61  |
| -12 | 21  | 49   | -46  | 49   | -66  |
| -7  | 17  | 48   | -32  | 48   | -49  |
| -7  | 14  | 33   | -28  | 33   | -40  |
| -8  | 18  | 50   | -34  | 50   | -54  |
| -14 | 20  | 27   | -54  | 27   | -74  |
| -9  | 24  | 85   | -37  | 81   | -63  |
| -9  | 20  | 60   | -34  | 60   | -51  |
| 25  | 5   | 163  | 78   | 149  | 62   |
| 37  | 2   | 182  | 100  | 118  | 99   |
| 3   | 12  | 109  | 3    | 109  | -6   |
| 4   | 17  | 112  | 2    | 108  | -18  |
| -6  | 22  | 76   | -29  | 72   | -44  |
| -14 | 17  | -4   | -50  | -16  | -62  |
| -3  | 23  | 95   | -21  | 81   | -43  |
| -21 | 31  | 34   | -72  | 27   | -95  |
| -22 | 33  | 23   | -77  | 14   | -106 |

|     |    |     |     |     |     |
|-----|----|-----|-----|-----|-----|
| -7  | 13 | 12  | -27 | -19 | -50 |
| -14 | 22 | 45  | -50 | 45  | -68 |
| 5   | 6  | 86  | 32  | 19  | 91  |
| -12 | 6  | -22 | -30 | -43 | -17 |
| 3   | 5  | 31  | 11  | -2  | 32  |
| 2   | 9  | 35  | 0   | 65  | -18 |
| 11  | 2  | 31  | 34  | 69  | 51  |
| 17  | -1 | 72  | 82  | 69  | 55  |
| -14 | 8  | -30 | -48 | 4   | -71 |
| -4  | 10 | 40  | -13 | 50  | -3  |
| -11 | 7  | -23 | -41 | 11  | -61 |
| -3  | 5  | 24  | -11 | 65  | -19 |
| 1   | 4  | 25  | 1   | 66  | -9  |
| 4   | 6  | 40  | 5   | 81  | -3  |
| -8  | 7  | 4   | -27 | 45  | -41 |
| 10  | 2  | 42  | 31  | 83  | 9   |
| -15 | 11 | -17 | -47 | 24  | -64 |
| 8   | -1 | 16  | 24  | 54  | 26  |
| -4  | 1  | -13 | -18 | 28  | -27 |
| -6  | 5  | -7  | -22 | 34  | -44 |
| -6  | 5  | -7  | -22 | 34  | -44 |
| -3  | 5  | 13  | -9  | 54  | -26 |
| -1  | 4  | 18  | 0   | 59  | -16 |
| 4   | 3  | 26  | 12  | 67  | 2   |
| -7  | 6  | -5  | -21 | 36  | -40 |
| 5   | 4  | 28  | 9   | 69  | -11 |
| -6  | 13 | 33  | -24 | 74  | -47 |
| -8  | 14 | 28  | -31 | 69  | -55 |
| 9   | 1  | 42  | 33  | 76  | 55  |
| 2   | 4  | 27  | -1  | 68  | -13 |
| 7   | 1  | 32  | 27  | 71  | 46  |
| -2  | 3  | -5  | -18 | 36  | -24 |
| 3   | 2  | 14  | 1   | 55  | -3  |
| 0   | 1  | 3   | -5  | 44  | -7  |
| 15  | 7  | 94  | 46  | 135 | 23  |
| 1   | 13 | 59  | -7  | 100 | -28 |
| 10  | 14 | 117 | 23  | 158 | 3   |
| -4  | 6  | 10  | -14 | 51  | -33 |
| 9   | 18 | 153 | 21  | 194 | -3  |
| -7  | 14 | 35  | -27 | 76  | -38 |
| 9   | 10 | 87  | 21  | 128 | 31  |
| 7   | 11 | 125 | 29  | 166 | 3   |
| -3  | 12 | 48  | -13 | 89  | -25 |
| 11  | 14 | 134 | 37  | 175 | 23  |
| -9  | 24 | 86  | -32 | 127 | -52 |
| -10 | 23 | 61  | -40 | 102 | -57 |
| -6  | 20 | 70  | -28 | 111 | -50 |
| -12 | 22 | 47  | -48 | 88  | -70 |
| -7  | 26 | 105 | -31 | 142 | -59 |
| -12 | 19 | 16  | -44 | 45  | -58 |

|    |     |     |     |     |     |
|----|-----|-----|-----|-----|-----|
| 24 | -23 | 47  | 98  | -61 | 183 |
| 26 | -28 | -6  | 97  | -40 | 98  |
| 18 | -32 | -65 | 57  | -77 | 70  |
| 21 | -20 | -4  | 66  | -15 | 74  |
| 30 | -27 | -8  | 100 | -11 | 143 |
| 5  | -21 | -69 | 18  | -76 | 21  |
| 15 | -19 | 1   | 53  | -30 | 89  |
| 8  | -22 | -62 | 25  | -69 | 31  |
| 16 | -24 | -13 | 57  | -13 | 78  |
| 16 | -24 | -15 | 55  | -15 | 73  |
| 20 | -25 | -14 | 67  | -14 | 83  |
| 16 | -23 | -15 | 56  | -15 | 77  |
| 23 | -23 | 1   | 71  | 1   | 89  |
| 11 | -22 | -35 | 39  | -35 | 51  |
| 29 | -27 | 3   | 97  | 3   | 101 |
| 27 | -30 | -23 | 90  | -26 | 118 |
| 15 | -28 | -52 | 48  | -52 | 65  |
| 13 | -24 | -46 | 44  | -46 | 48  |
| 13 | -24 | -46 | 44  | -46 | 48  |
| 16 | -24 | -26 | 57  | -26 | 66  |
| 18 | -25 | -21 | 66  | -21 | 76  |
| 23 | -26 | -13 | 78  | -13 | 94  |
| 12 | -23 | -44 | 45  | -44 | 52  |
| 24 | -25 | -11 | 75  | -11 | 81  |
| 13 | -16 | -6  | 42  | -6  | 45  |
| 11 | -15 | -11 | 35  | -11 | 37  |
| 28 | -28 | 3   | 99  | -4  | 147 |
| 21 | -25 | -12 | 65  | -12 | 79  |
| 26 | -28 | -7  | 93  | -9  | 138 |
| 17 | -26 | -44 | 48  | -44 | 68  |
| 22 | -27 | -25 | 67  | -25 | 89  |
| 19 | -28 | -36 | 61  | -36 | 85  |
| 34 | -22 | 55  | 112 | 55  | 115 |
| 20 | -16 | 20  | 59  | 20  | 64  |
| 29 | -15 | 78  | 89  | 78  | 95  |
| 28 | -11 | 114 | 87  | 114 | 89  |
| 12 | -15 | -4  | 39  | -4  | 54  |
| 28 | -19 | 48  | 87  | 48  | 123 |
| 26 | -18 | 86  | 95  | 86  | 95  |
| 16 | -17 | 9   | 53  | 9   | 67  |
| 30 | -15 | 95  | 103 | 95  | 115 |
| 18 | -3  | 124 | 66  | 124 | 71  |
| 9  | -6  | 22  | 26  | 22  | 35  |
| 9  | -6  | 30  | 26  | 30  | 30  |
| 13 | -9  | 31  | 38  | 31  | 42  |
| 7  | -7  | 8   | 18  | 8   | 22  |
| 12 | -3  | 66  | 35  | 62  | 33  |
| 12 | -7  | 41  | 38  | 41  | 45  |
| 7  | -5  | 26  | 22  | 26  | 28  |
| 18 | -6  | 37  | 58  | 39  | 47  |

|    |     |      |     |      |     |
|----|-----|------|-----|------|-----|
| 17 | -11 | 4    | 75  | -7   | 71  |
| 8  | -8  | -2   | 35  | 15   | 49  |
| 1  | -7  | -36  | 3   | -26  | -11 |
| 0  | -5  | -38  | -3  | -35  | 5   |
| 9  | -9  | 11   | 33  | 28   | 31  |
| 13 | -10 | 12   | 45  | 29   | 41  |
| 9  | -8  | 11   | 34  | 28   | 35  |
| 16 | -9  | 18   | 45  | 35   | 42  |
| 16 | -8  | 27   | 49  | 44   | 47  |
| 4  | -7  | -9   | 17  | 8    | 9   |
| 22 | -12 | 29   | 75  | 46   | 59  |
| 15 | -12 | 9    | 51  | 26   | 51  |
| 20 | -15 | 3    | 68  | 17   | 76  |
| 8  | -13 | -26  | 26  | -9   | 23  |
| 6  | -9  | -20  | 22  | -3   | 6   |
| 6  | -9  | -20  | 22  | -3   | 6   |
| 9  | -9  | 0    | 35  | 17   | 24  |
| 5  | -8  | -18  | 23  | -1   | 10  |
| 17 | -10 | 15   | 53  | 32   | 39  |
| 21 | -13 | 29   | 77  | 39   | 105 |
| 14 | -10 | 14   | 43  | 31   | 37  |
| 10 | -11 | -18  | 26  | -1   | 26  |
| 15 | -12 | 1    | 45  | 18   | 47  |
| 12 | -13 | -10  | 39  | 7    | 43  |
| 27 | -7  | 81   | 90  | 98   | 73  |
| 22 | 0   | 104  | 67  | 121  | 53  |
| 21 | -4  | 74   | 65  | 91   | 81  |
| 6  | 6   | 57   | 16  | 74   | 0   |
| 0  | 8   | 34   | -4  | 51   | -20 |
| 5  | 8   | 67   | 16  | 84   | 3   |
| 51 | -10 | 189  | 150 | 142  | 153 |
| 17 | 0   | 116  | 53  | 133  | 48  |
| 8  | 10  | 83   | 21  | 96   | 10  |
| -7 | 19  | 41   | -22 | 51   | -41 |
| 12 | -16 | -39  | 39  | -50  | 37  |
| 2  | -18 | -78  | 16  | -74  | 39  |
| 28 | -25 | -27  | 89  | -29  | 106 |
| -5 | -17 | -112 | -16 | -115 | -21 |
| -6 | -15 | -114 | -22 | -124 | -5  |
| 3  | -19 | -65  | 14  | -61  | 21  |
| 10 | -18 | -49  | 30  | -45  | 37  |
| 16 | -22 | -47  | 56  | -43  | 49  |
| 9  | -22 | -67  | 32  | -63  | 41  |
| 14 | -25 | -73  | 49  | -72  | 66  |
| 0  | -19 | -96  | 3   | -92  | -4  |
| 3  | -19 | -76  | 16  | -72  | 14  |
| -1 | -18 | -94  | 4   | -90  | 0   |
| 11 | -20 | -61  | 34  | -57  | 29  |
| 15 | -23 | -47  | 58  | -50  | 95  |
| 9  | -22 | -75  | 26  | -71  | 37  |

|     |     |     |     |     |     |
|-----|-----|-----|-----|-----|-----|
| 6   | -23 | -86 | 20  | -82 | 33  |
| 21  | -17 | 5   | 71  | 9   | 63  |
| 16  | -10 | 28  | 48  | 32  | 43  |
| 15  | -14 | -2  | 46  | 2   | 71  |
| 0   | -4  | -19 | -3  | -15 | -10 |
| -6  | -2  | -42 | -23 | -38 | -30 |
| -1  | -2  | -9  | -3  | -5  | -7  |
| 45  | -20 | 113 | 131 | 53  | 143 |
| 2   | 0   | 7   | 2   | 7   | 0   |
| -13 | 9   | -35 | -41 | -38 | -51 |
| 5   | -7  | -17 | 18  | -62 | 17  |
| 0   | -3  | -12 | 7   | -69 | 9   |
| 7   | -1  | 71  | 47  | -35 | 100 |
| 4   | -5  | -7  | 41  | -34 | 25  |
| 34  | -9  | 79  | 114 | 58  | 112 |
| -5  | -3  | -7  | 22  | -60 | 18  |
| 13  | -6  | 31  | 47  | 17  | 50  |
| 10  | -9  | -1  | 42  | -10 | 26  |
| 1   | -5  | 4   | 22  | 6   | 14  |
| 5   | -4  | 7   | 18  | 6   | 23  |
| -16 | 3   | -55 | -38 | -94 | -29 |
| 12  | -3  | 53  | 46  | 3   | 76  |
| 1   | -5  | -13 | 10  | -48 | 10  |
| 18  | 2   | 117 | 61  | 17  | 121 |
| -2  | 3   | 25  | 2   | -4  | 6   |
| -13 | 1   | -41 | -30 | -46 | -57 |
| -10 | 2   | -29 | -24 | -37 | -25 |
| -10 | 2   | -36 | -30 | -48 | -34 |
| -5  | 6   | 24  | -12 | -12 | -12 |
| -5  | -2  | -15 | -8  | -13 | -21 |
| 19  | -7  | 38  | 65  | 38  | 74  |
| 3   | -4  | 11  | 23  | 13  | 3   |
| -10 | 2   | -36 | -28 | -34 | -56 |
| 9   | 6   | 86  | 29  | 88  | 2   |
| -2  | -1  | -3  | 3   | -1  | -22 |
| 13  | 2   | 74  | 47  | 76  | 18  |
| 44  | 6   | 312 | 158 | 314 | 157 |
| 19  | 12  | 220 | 66  | 222 | 34  |
| 32  | -1  | 150 | 93  | 120 | 78  |
| -15 | 11  | -2  | -42 | 0   | -56 |
| -2  | 21  | 129 | -6  | 131 | -36 |
| 6   | -1  | 25  | 20  | 27  | 6   |
| 8   | 2   | 64  | 28  | 66  | 26  |
| 0   | 9   | 54  | -1  | 56  | -30 |
| -2  | 16  | 88  | -8  | 90  | -31 |
| 6   | 2   | 50  | 26  | 52  | -1  |
| 24  | 4   | 154 | 86  | 156 | 88  |
| -9  | 8   | 12  | -12 | 10  | -35 |
| 39  | -3  | 184 | 124 | 129 | 111 |
| -14 | 20  | 23  | -43 | 22  | -71 |

|     |    |      |      |      |     |
|-----|----|------|------|------|-----|
| -4  | 16 | 77   | -11  | 79   | -36 |
| -19 | 20 | -3   | -51  | -1   | -88 |
| -15 | 11 | -2   | -42  | 0    | -56 |
| -10 | 20 | 52   | -33  | 54   | -62 |
| -11 | 0  | -30  | -25  | -28  | -43 |
| 45  | -9 | 109  | 139  | 86   | 155 |
| 6   | -3 | 23   | 47   | -32  | 61  |
| 21  | -9 | 29   | 67   | 18   | 69  |
| 12  | -5 | 34   | 47   | 34   | 57  |
| 23  | -3 | 83   | 71   | 31   | 119 |
| 9   | 3  | 55   | 27   | 24   | 49  |
| 1   | 2  | 1    | 1    | -9   | 18  |
| 6   | -2 | 15   | 17   | 15   | 22  |
| 20  | 6  | 116  | 54   | 116  | 45  |
| 55  | 6  | 342  | 183  | 342  | 200 |
| -8  | 20 | 27   | -26  | 27   | -45 |
| 11  | 9  | 84   | 24   | 84   | 13  |
| 35  | 4  | 184  | 111  | 184  | 131 |
| 50  | -3 | 214  | 149  | 157  | 154 |
| 7   | 16 | 107  | 14   | 107  | 7   |
| -4  | 11 | 28   | -17  | 28   | -13 |
| 0   | 0  | 0    | 0    | 0    | 0   |
| 3   | -3 | -9   | 10   | -56  | 8   |
| -2  | 1  | -4   | -1   | -63  | 0   |
| 5   | 3  | 79   | 39   | -29  | 91  |
| 2   | -1 | 1    | 33   | -28  | 16  |
| -1  | 5  | 29   | 7    | -38  | 40  |
| 32  | -5 | 87   | 106  | 64   | 103 |
| 3   | 7  | 57   | 14   | -50  | 57  |
| 16  | 6  | 125  | 53   | 23   | 112 |
| -12 | 6  | -21  | -32  | -31  | -34 |
| -7  | 10 | 32   | -20  | -6   | -21 |
| -7  | 2  | -7   | -16  | -7   | -30 |
| -12 | 6  | -28  | -36  | -28  | -65 |
| 7   | 10 | 94   | 21   | 94   | -7  |
| 17  | 16 | 228  | 58   | 228  | 25  |
| 30  | 3  | 158  | 85   | 126  | 69  |
| -17 | 15 | 6    | -50  | 6    | -65 |
| -6  | 20 | 85   | -19  | 85   | -45 |
| -4  | 20 | 96   | -16  | 96   | -40 |
| 22  | 8  | 162  | 78   | 162  | 79  |
| -16 | 29 | 85   | -45  | 85   | -78 |
| -30 | -6 | -185 | -89  | -162 | -89 |
| -35 | -2 | -180 | -100 | -169 | -97 |
| -34 | 2  | -147 | -92  | -144 | -57 |
| -1  | -8 | -89  | 7    | -42  | 6   |
| -40 | -2 | -175 | -85  | -160 | -88 |
| -22 | -5 | -137 | -60  | -83  | -56 |
| -25 | -8 | -169 | -65  | -110 | -80 |
| -34 | -4 | -164 | -85  | -94  | -92 |

|     |     |      |      |      |      |
|-----|-----|------|------|------|------|
| -30 | -3  | -161 | -89  | -94  | -83  |
| -23 | -2  | -115 | -61  | -97  | -30  |
| -37 | 4   | -143 | -105 | -104 | -100 |
| -45 | 3   | -197 | -131 | -137 | -131 |
| -16 | -6  | -130 | -42  | -62  | -32  |
| -26 | 7   | -82  | -78  | -12  | -104 |
| -37 | 0   | -171 | -104 | -101 | -128 |
| -22 | 3   | -94  | -60  | -24  | -88  |
| 9   | 7   | 144  | 51   | 214  | 51   |
| -16 | 13  | 52   | -41  | 122  | -72  |
| -3  | 0   | -18  | -14  | 20   | -28  |
| -50 | 12  | -170 | -149 | -100 | -162 |
| -37 | 22  | -39  | -113 | 31   | -142 |
| -29 | 0   | -143 | -87  | -73  | -100 |
| -39 | 17  | -91  | -118 | -21  | -142 |
| -27 | 3   | -104 | -79  | -34  | -80  |
| -35 | 10  | -114 | -108 | -44  | -136 |
| -37 | 17  | -80  | -115 | -10  | -137 |
| -11 | 5   | -14  | -21  | 56   | -18  |
| 4   | -2  | 16   | 17   | 29   | 5    |
| -6  | 1   | 0    | -8   | 56   | -31  |
| 7   | -2  | 23   | 18   | 23   | 11   |
| -39 | 17  | -91  | -118 | -21  | -142 |
| -54 | 21  | -171 | -158 | -101 | -194 |
| -49 | 26  | -91  | -144 | -21  | -175 |
| -50 | 12  | -170 | -149 | -100 | -162 |
| -37 | 22  | -30  | -112 | 40   | -141 |
| -36 | 6   | -113 | -93  | -168 | -75  |
| -43 | 9   | -163 | -130 | -93  | -153 |
| 0   | -10 | -55  | -1   | -114 | 38   |
| 4   | -12 | -50  | 33   | -79  | 54   |
| 34  | -16 | 36   | 106  | 13   | 141  |
| 10  | -16 | -44  | 34   | -55  | 55   |
| 1   | -12 | -39  | 14   | -39  | 43   |
| -16 | -4  | -98  | -46  | -139 | 0    |
| 12  | -10 | 10   | 38   | -42  | 105  |
| -2  | -4  | -18  | -6   | -49  | 35   |
| -10 | -5  | -72  | -32  | -82  | 4    |
| -5  | -9  | -58  | -16  | -58  | 8    |
| 9   | -1  | 43   | 21   | 43   | 31   |
| 13  | -5  | 31   | 39   | 31   | 47   |
| 44  | -1  | 269  | 150  | 269  | 186  |
| 0   | 2   | 11   | -9   | 11   | -1   |
| 24  | -3  | 111  | 78   | 111  | 117  |
| -9  | 1   | -31  | -20  | -35  | -6   |
| 39  | -10 | 141  | 116  | 84   | 140  |
| -4  | 9   | 34   | -19  | 34   | -7   |
| -19 | 13  | -46  | -59  | -46  | -59  |
| -15 | 4   | -45  | -50  | -45  | -27  |
| 13  | -2  | 62   | 48   | -5   | 113  |

|     |     |     |      |      |      |
|-----|-----|-----|------|------|------|
| 46  | -12 | 120 | 147  | 97   | 176  |
| 22  | -12 | 40  | 75   | 29   | 90   |
| 24  | -6  | 94  | 79   | 42   | 140  |
| 17  | 0   | 90  | 55   | -17  | 130  |
| 2   | -1  | 12  | 9    | 2    | 39   |
| 7   | 3   | 65  | 21   | 27   | 52   |
| 2   | -1  | 5   | 5    | 5    | 8    |
| 21  | 3   | 127 | 62   | 127  | 66   |
| -3  | 8   | 39  | -9   | 39   | 8    |
| 10  | 13  | 129 | 25   | 129  | 33   |
| 36  | 1   | 195 | 119  | 195  | 152  |
| -2  | 22  | 118 | -4   | 118  | -5   |
| -20 | 8   | -44 | -62  | -70  | -40  |
| -19 | 8   | -44 | -62  | -17  | -98  |
| -12 | 1   | -47 | -31  | -40  | -74  |
| -9  | -2  | -53 | -33  | -27  | -51  |
| -11 | -2  | -66 | -35  | -36  | -63  |
| -20 | 2   | -61 | -55  | -20  | -75  |
| -16 | 3   | -58 | -59  | -20  | -66  |
| -20 | 2   | -78 | -67  | -74  | -79  |
| -31 | 9   | -94 | -101 | -63  | -114 |
| -26 | 13  | -41 | -89  | -38  | -101 |
| -2  | 0   | -27 | -12  | 12   | -15  |
| -18 | 3   | -54 | -54  | -13  | -86  |
| -15 | -1  | -72 | -49  | -35  | -72  |
| -12 | 13  | 21  | -48  | 62   | -87  |
| -36 | 18  | -67 | -119 | -26  | -145 |
| -18 | 5   | -60 | -63  | -19  | -105 |
| -25 | 23  | 12  | -88  | 53   | -125 |
| -11 | 19  | 56  | -42  | 97   | -84  |
| -29 | 26  | -6  | -103 | 35   | -148 |
| -40 | 30  | -53 | -131 | -12  | -180 |
| -25 | 23  | 12  | -88  | 53   | -125 |
| -53 | 39  | -47 | -170 | -167 | -69  |
| -36 | 15  | -91 | -120 | -50  | -154 |
| 36  | -15 | 91  | 120  | 50   | 154  |
